# Supplementary material for: Inhibition of Soluble Epoxide Hydrolase Is Protective against the Multiomic Effects of a High Glycemic Diet on Brain Microvascular Inflammation and Cognitive Dysfunction
Source: MDPI journal article supplement (doi:10.3390/nu13113913), 2021-11-01
Supplement: s1 [file s1]

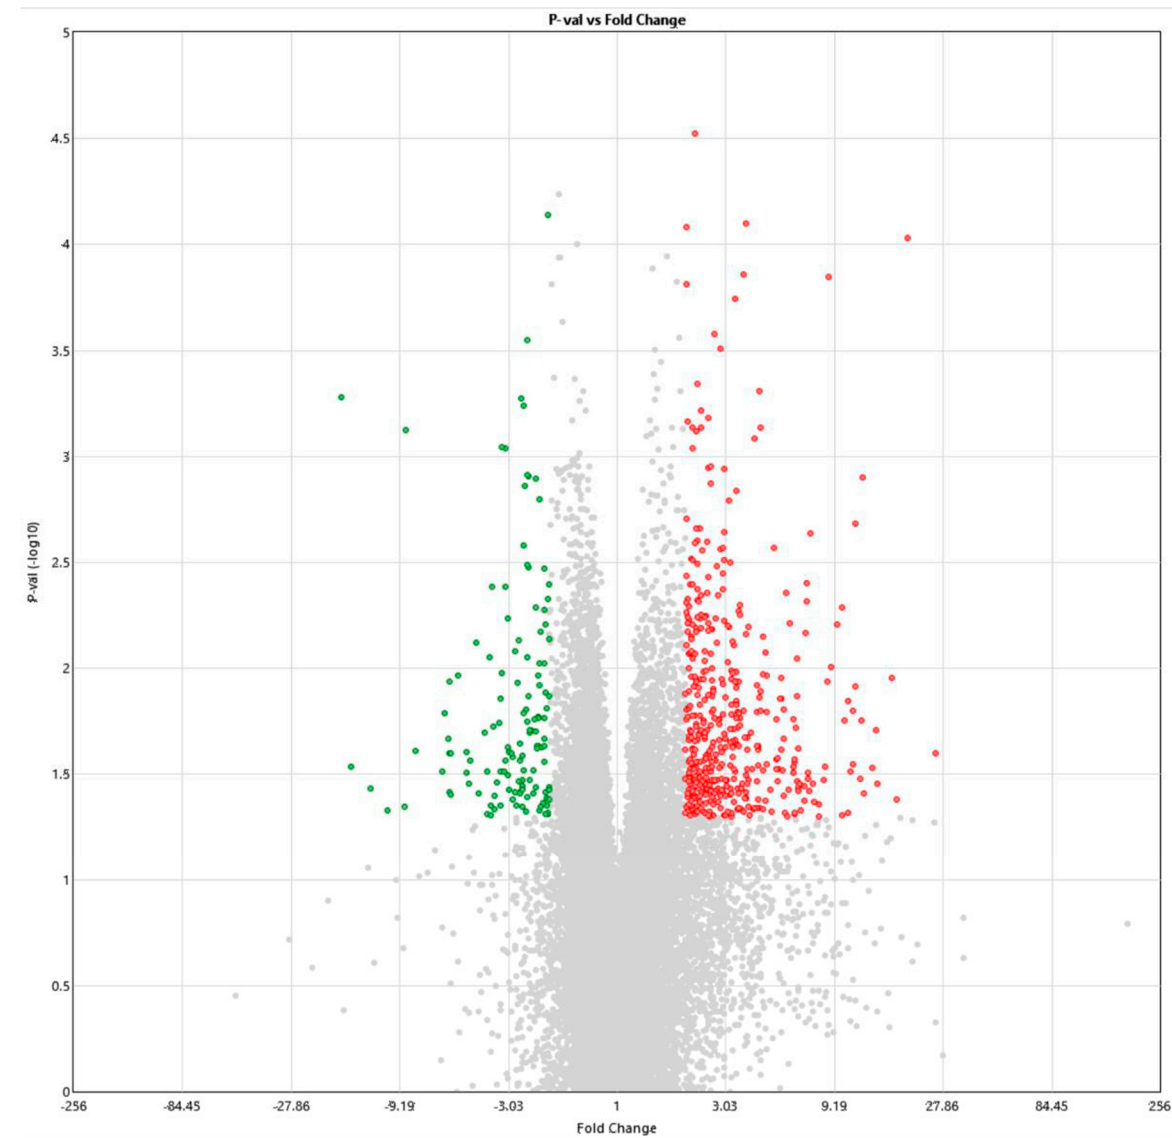

**Supplement Figure S1: Volcano plot of differential gene expression changes in hippocampal microvessels for the high glycemic diet (HGD) compared to the low glycemic diet (LGD).** The transcriptome of hippocampus microvessels from the high glycemic diet (HGD) compared to low glycemic diet (LGD). The data are shown for three biological replicates for each dietary group. The x-axis specifies the fold-changes (FC), and the y-axis specifies the negative logarithm to the base 10 of the p-values. Filtering criteria for differentially expressed genes (DEGs) is  $FC = \pm 2.0$  and  $p\text{-value} < 0.05$ . Red and green dots represent probe sets for transcripts expressed at significantly higher or lower levels than LGD, respectively.

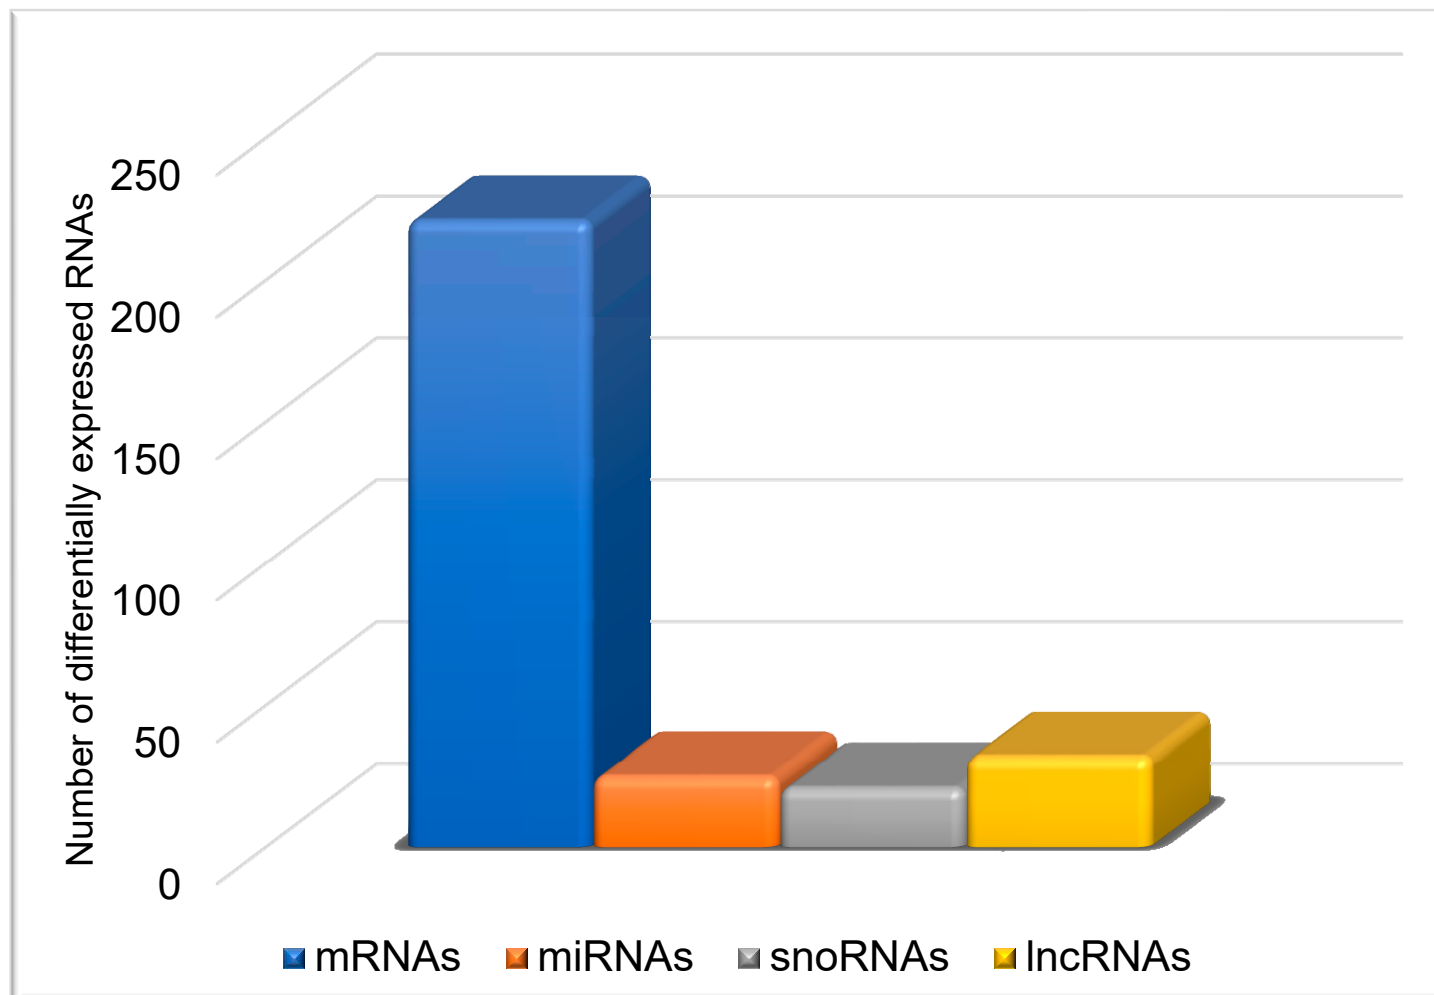

**Supplemental Figure S2: Distribution of differentially expressed RNAs in hippocampal microvessels for the high glycemic diet (HGD) when compared to the low glycemic diet (LGD).** Number of differentially expressed protein coding (messenger RNAs=mRNAs, blue) and non-protein coding RNAs (microRNAs=miRNAs, orange; small nucleolar RNA=snoRNAs, grey; and long non-coding RNA=lncRNAs, yellow) in hippocampal microvessels from the high glycemic diet (HGD) compared to low glycemic diet (LGD). The data are shown for three biological replicates for each dietary group.

Supplemental Figure S3

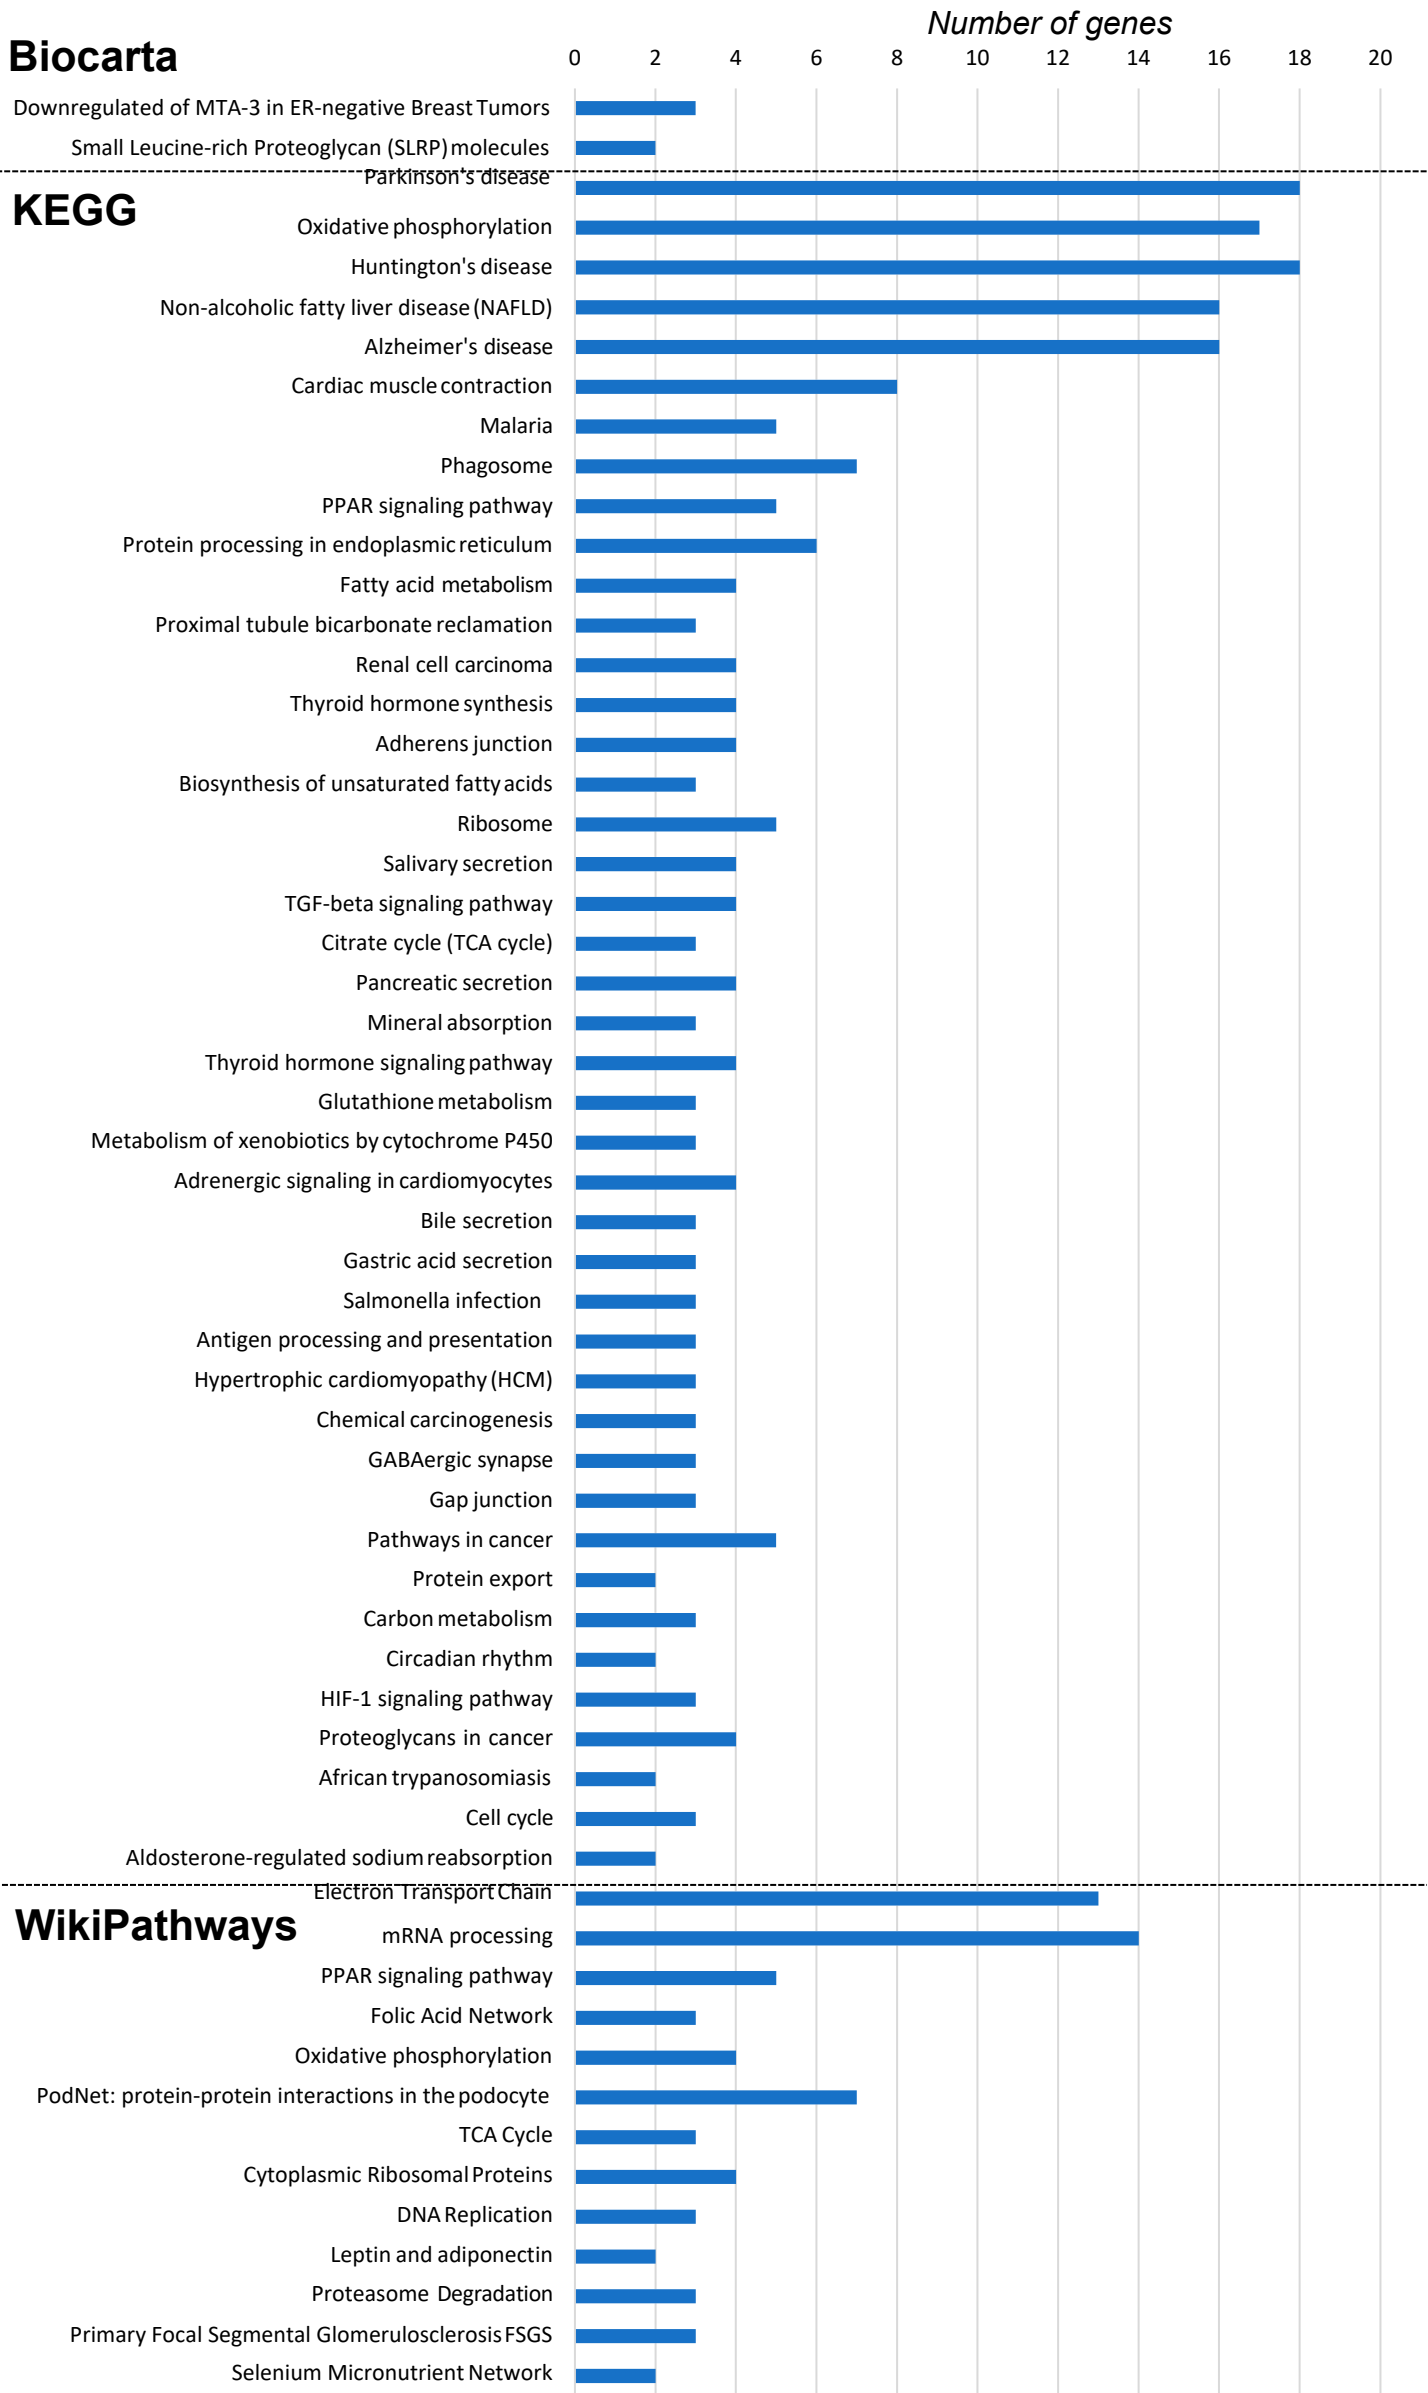

**Supplemental Figure S3: Histogram of differentially expressed protein coding genes pathways in hippocampal microvessels for the high glycemic diet (HGD) when compared to the low glycemic diet (LGD).** Significant cellular pathways ( $p < 0.05$ ) of differentially expressed protein coding genes in hippocampus microvessels from the high glycemic diet (HGD) compared to low glycemic diet (LGD). The data are shown for three biological replicates for each dietary group. Biocarta, KEGG and WikiPathways were identified using Genetrial2 online database.



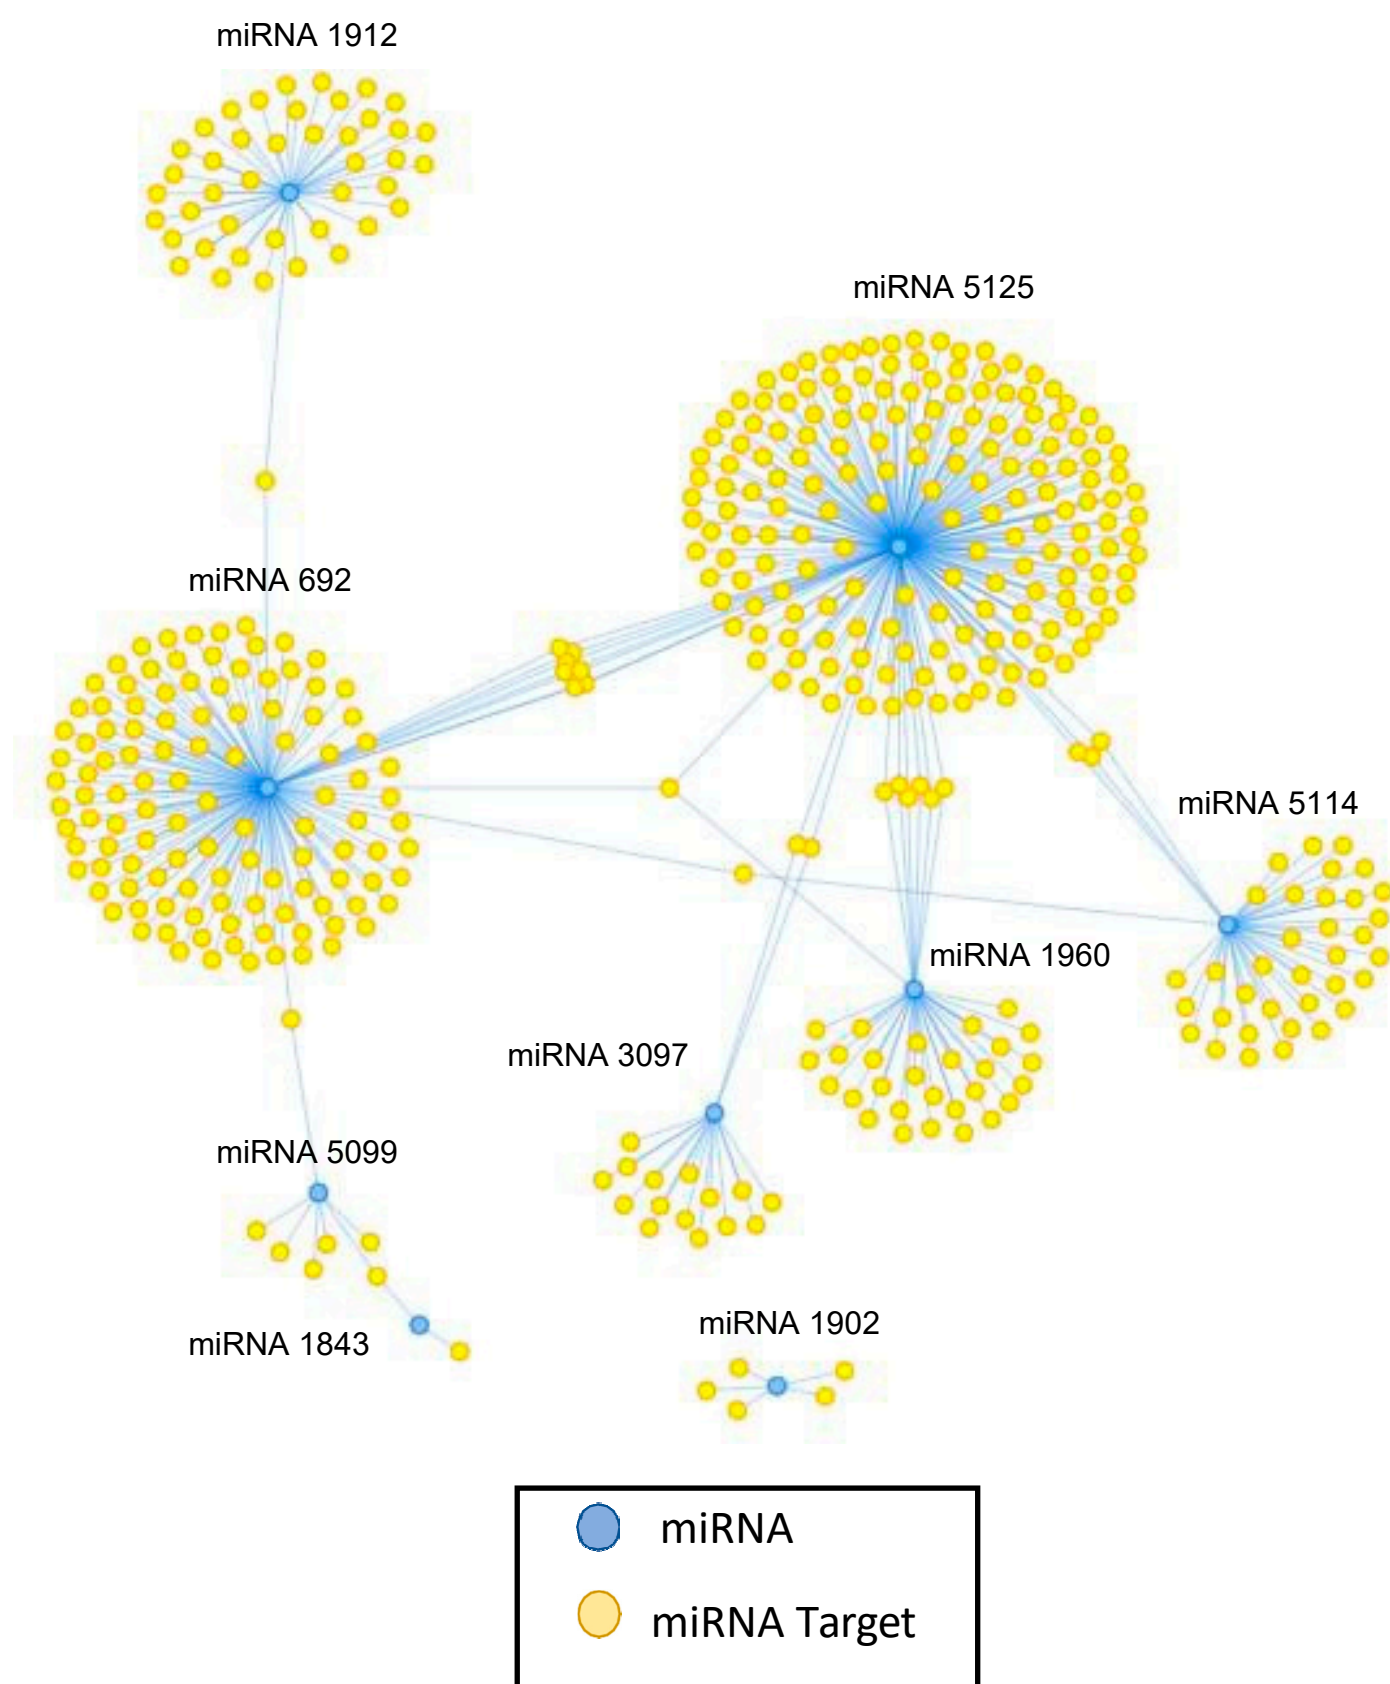

**Supplemental Figure S5. Target gene networks of differentially expressed miRNAs in hippocampal microvessels with the high glycemic diet (HGD) compared to the low glycemic diet (LGD).** The network of interactions between differentially expressed miRNAs (blue circles) and their target genes (yellow circles) of the high glycemic diet (HGD) compared to the low glycemic diet (LGD). The data are shown for three biological replicates for each dietary group. miRNA targets were identified using Mienturnet database.

Supplemental Figure S6

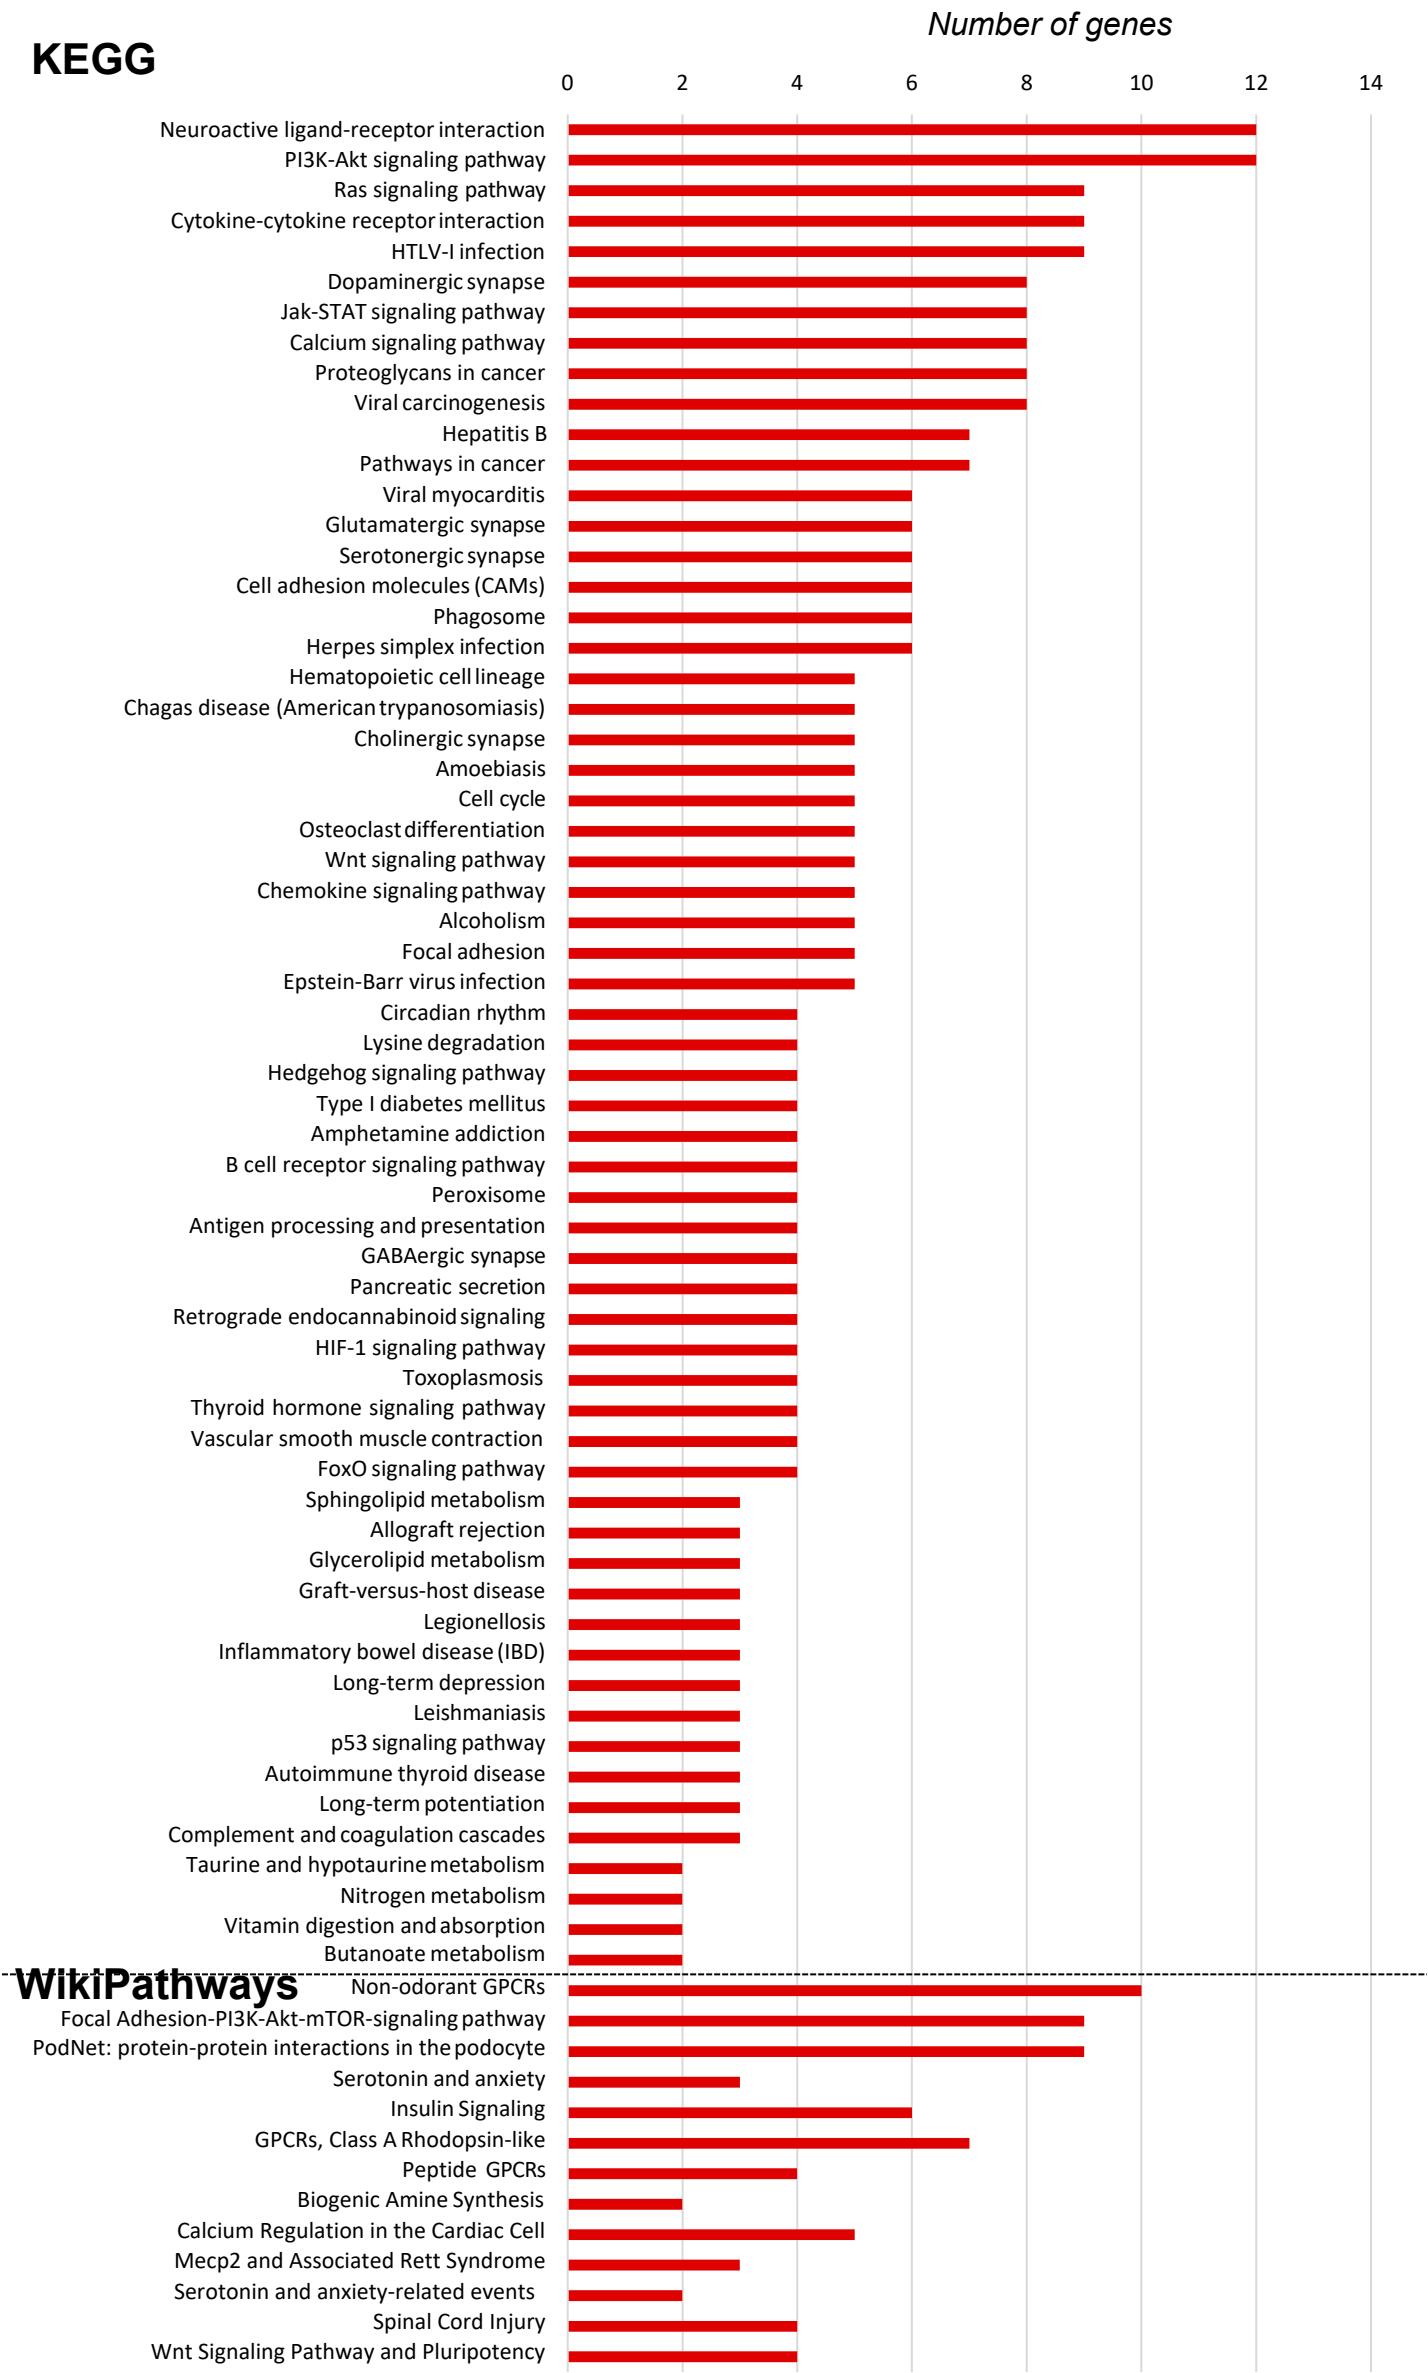

**Supplemental Figure S6: Histogram of differentially expressed miRNA targets pathways in hippocampal microvessels with the high glycemic diet (HGD) when compared to the low glycemic diet (LGD).** Significant cellular pathways ( $p < 0.05$ ) of differentially expressed miRNA target genes in hippocampus microvessels from the high glycemic diet (HGD) compared to low glycemic diet (LGD). KEGG and WikiPathways were identified using Genetrial2 online database. The data are shown for three biological replicates for each dietary group.



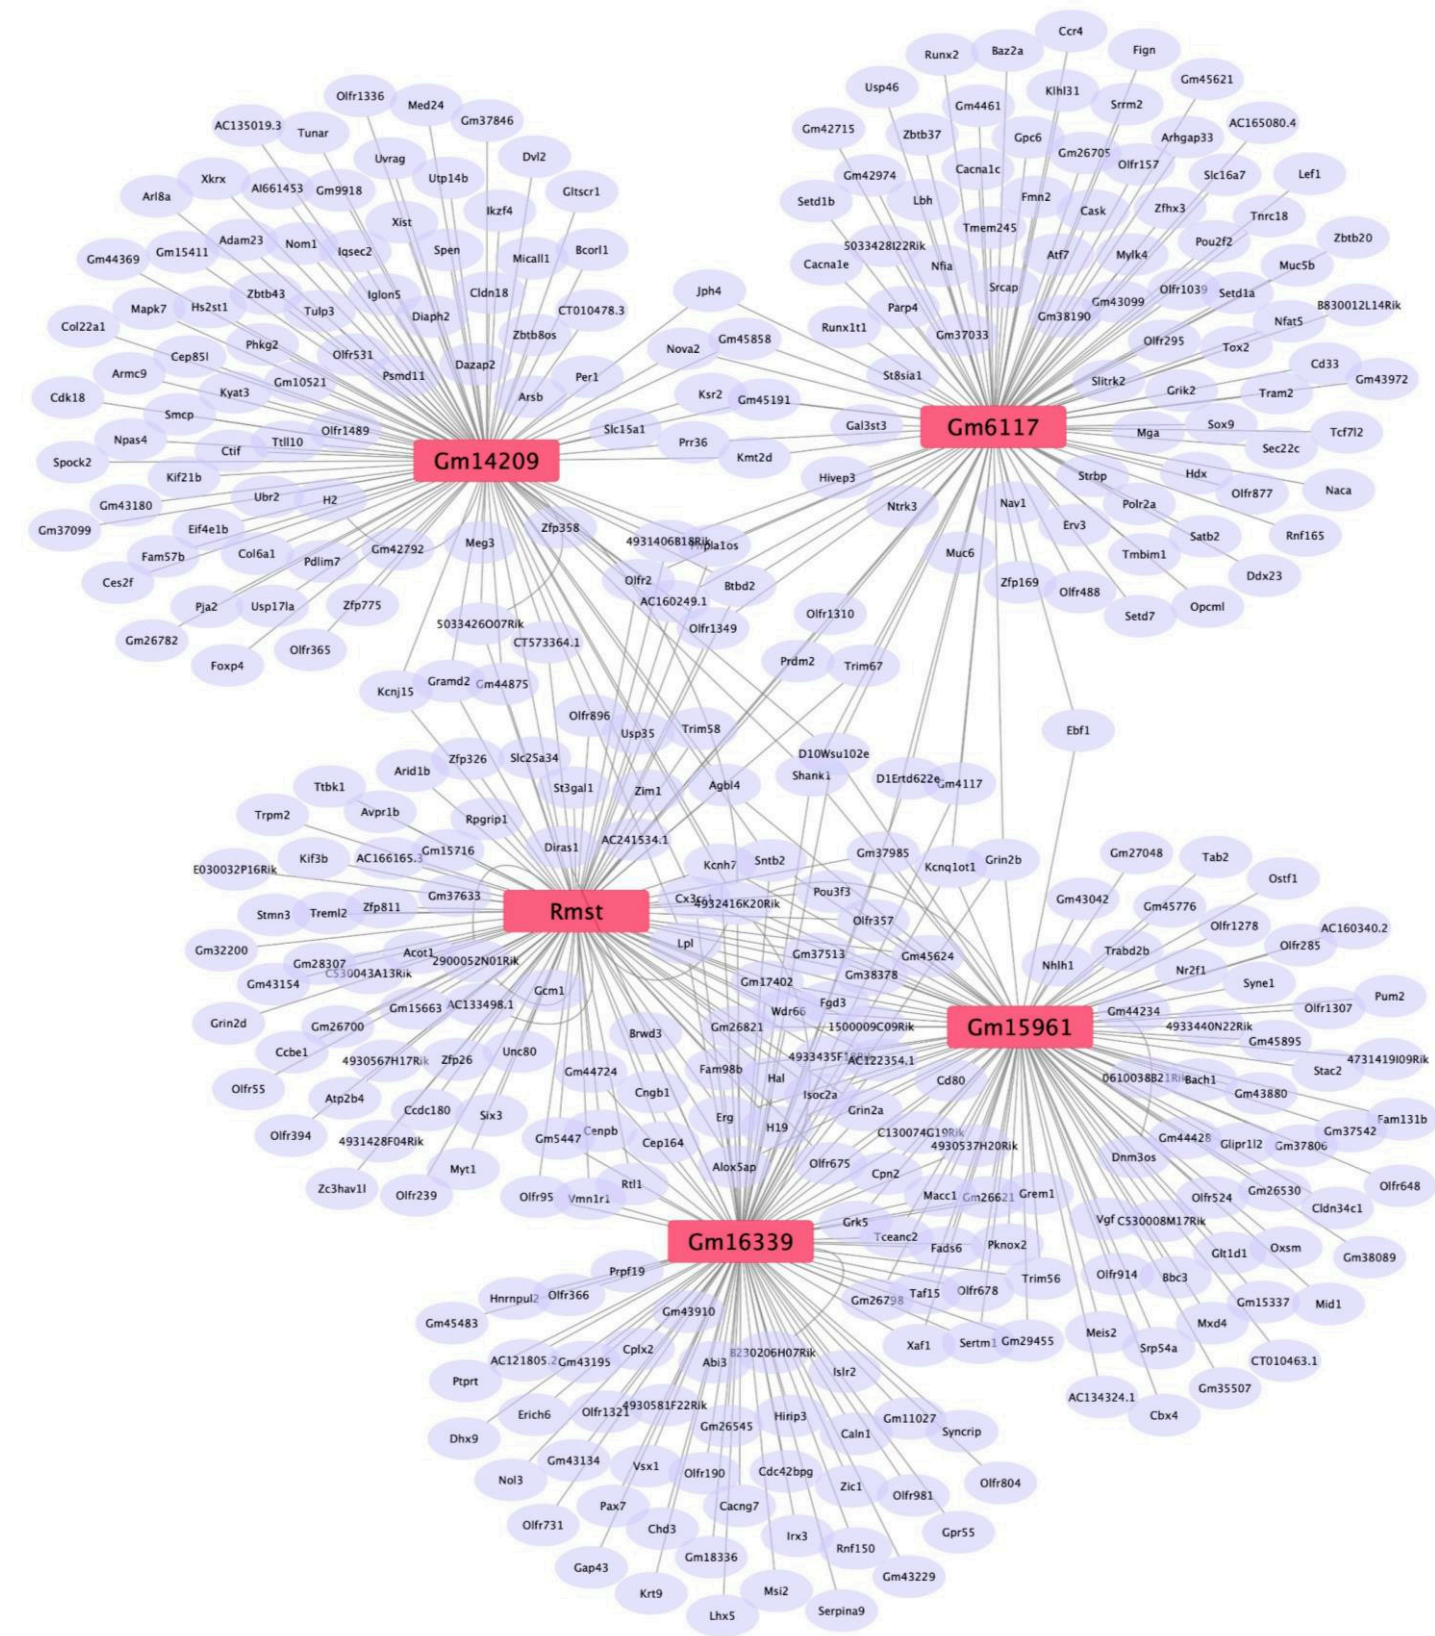

**Supplemental Figure S7. Target gene networks of differentially expressed lncRNAs in hippocampal microvessels with the high glycemic diet (HGD) compared to the low glycemic diet (LGD).** The network of interactions between differentially expressed lncRNAs (red boxes) and their target genes (purple circles) of the high glycemic diet (HGD) compared to the low glycemic diet (LGD). The data are shown for three biological replicates for each dietary group. lncRNA targets were identified using lncRRsearch and Rtools CBRC databases.

Supplemental Figure S8

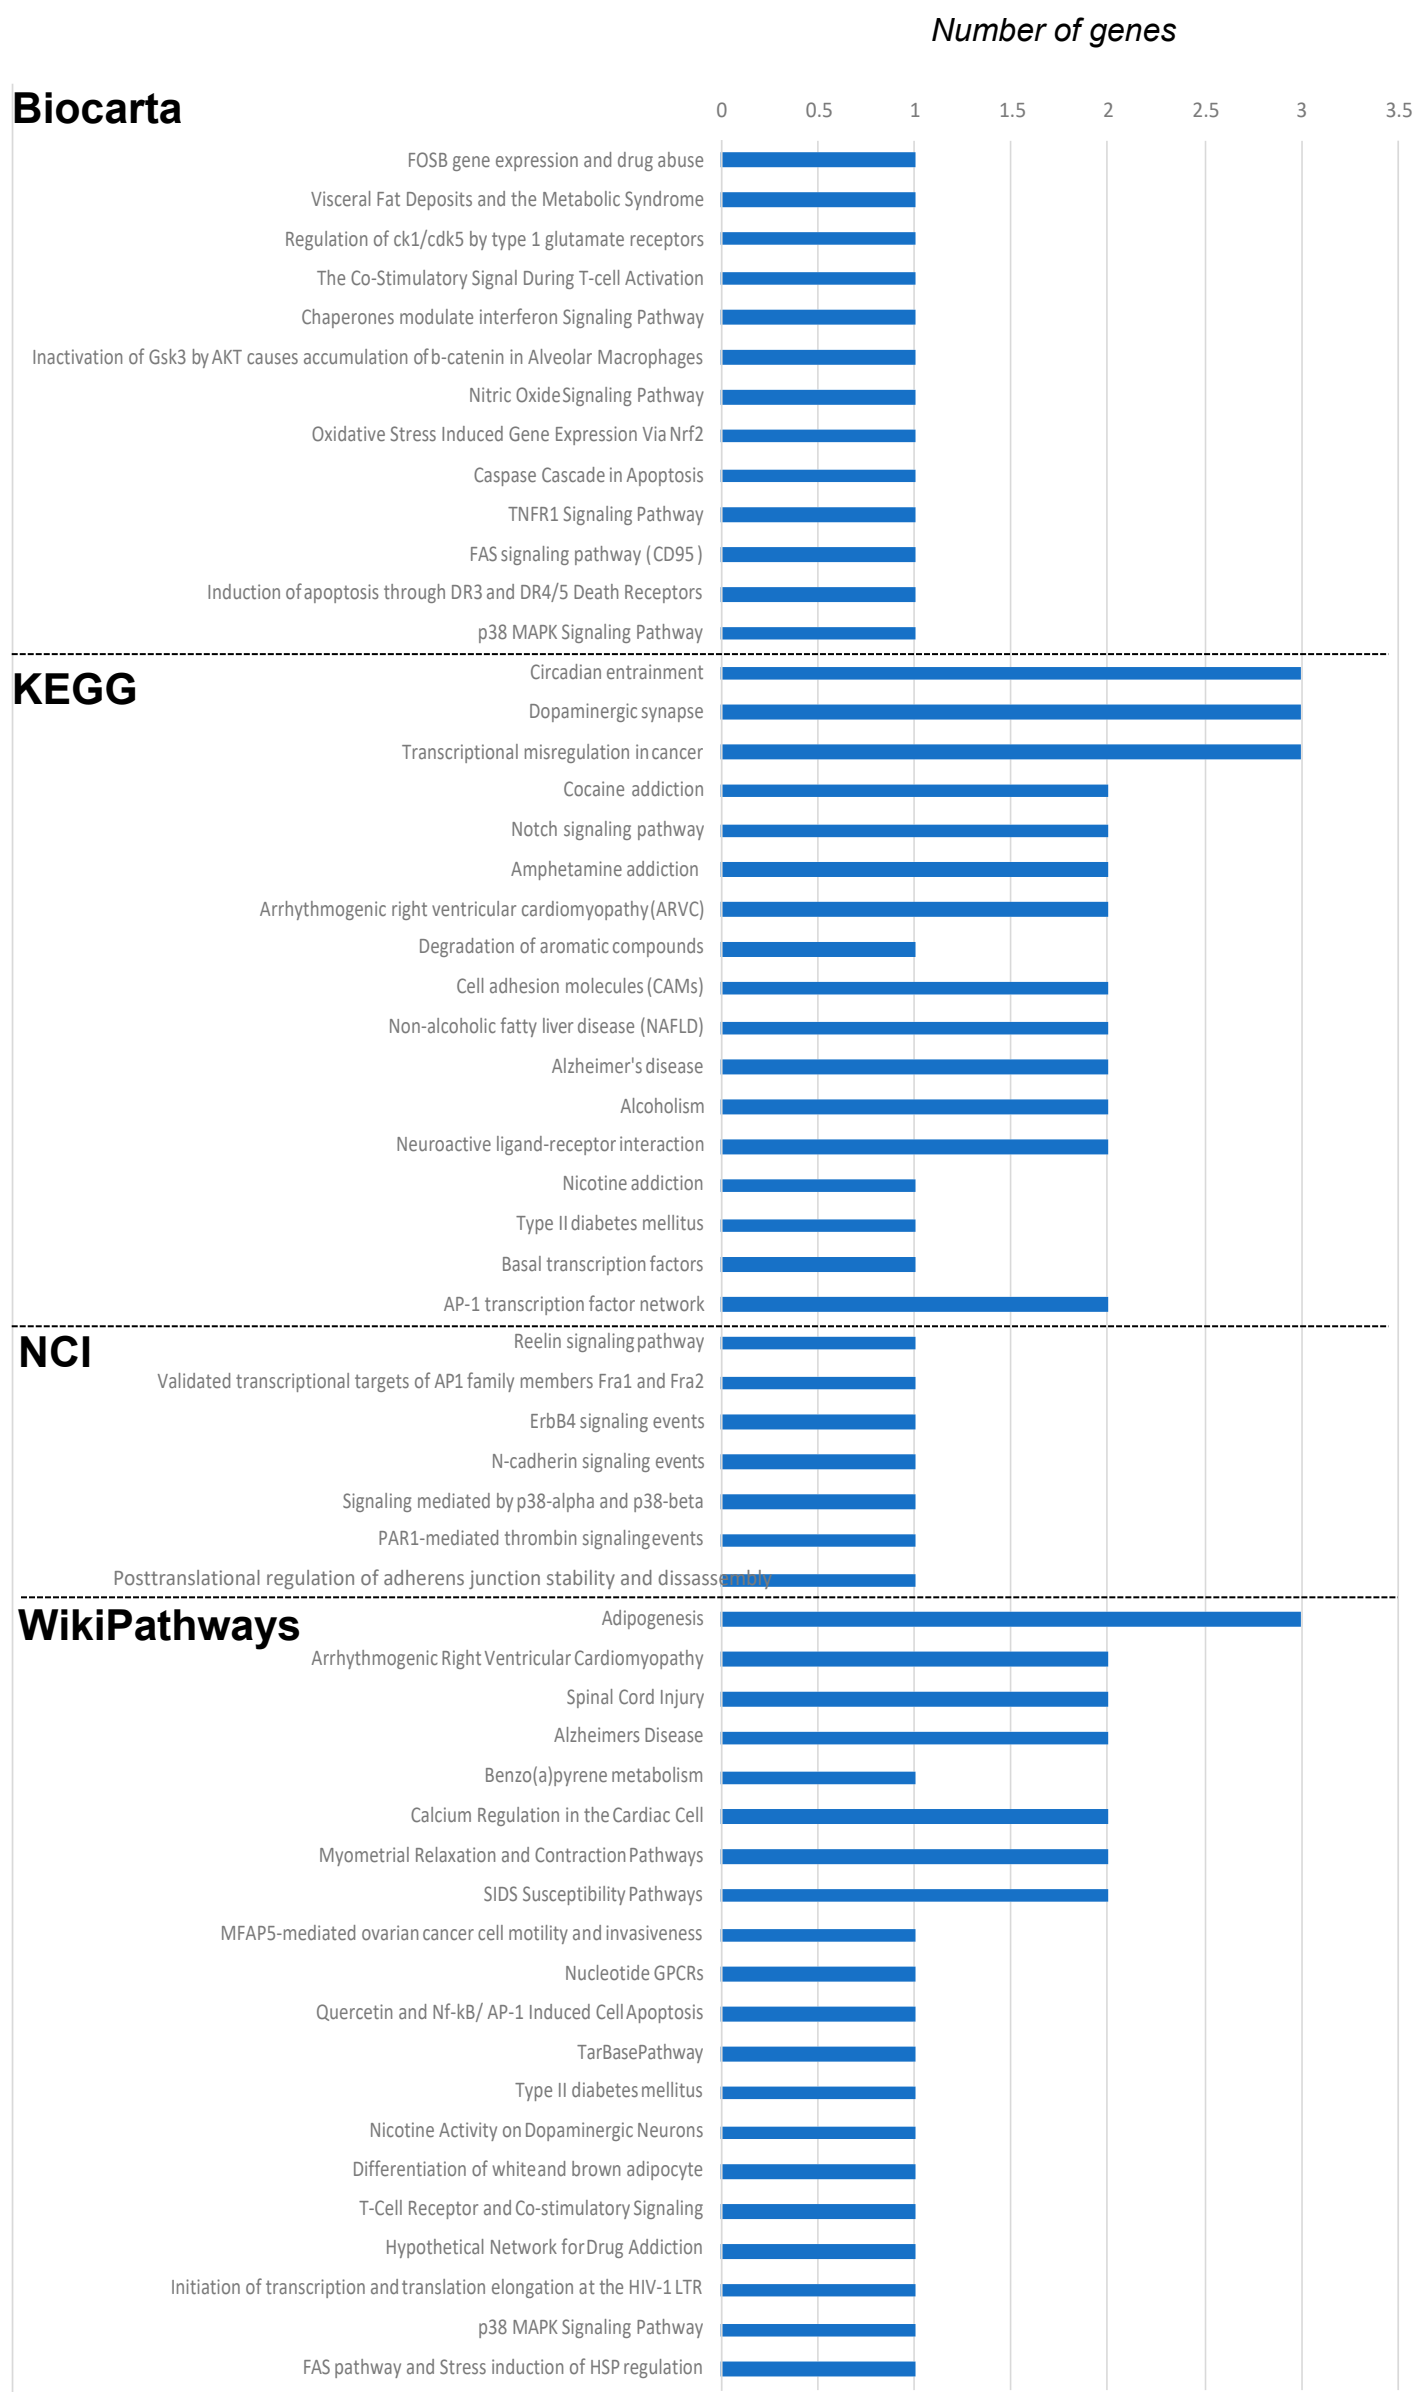

**Supplemental Figure S8: Histogram of differentially expressed lncRNA targets pathways in hippocampal microvessels with the high glycemic diet (HGD) when compared to the low glycemic diet (LGD).** Significant cellular pathways ( $p < 0.05$ ) of differentially expressed lncRNA target genes in hippocampus microvessels from the high glycemic diet (HGD) compared to low glycemic diet (LGD). The data are shown for three biological replicates for each dietary group. Biocarta, KEGG, NCI and WikiPathways were identified using Genetrial2 online database.

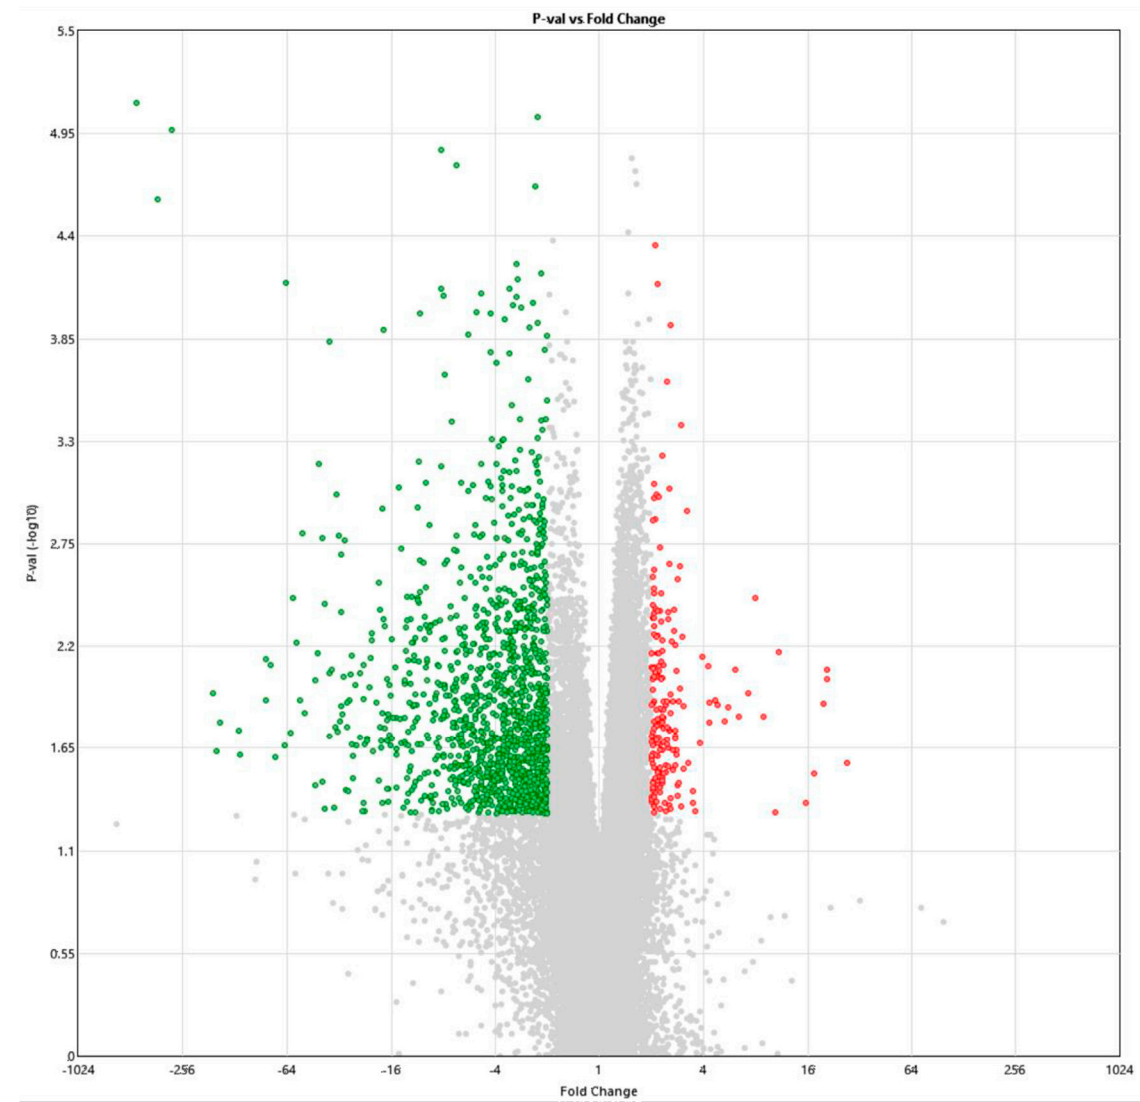

**Supplement Figure S9: Volcano plot of differential gene expression changes in hippocampal microvessels for the high glycemic diet (HGD) with soluble epoxide hydrolase inhibitor (sEHI) compared to without sEHI treatment.** The transcriptome of hippocampus microvessels from the high glycemic diet (HGD) with soluble epoxide hydrolase inhibitor (sEHI) compared to without sEHI treatment. The data are shown for three biological replicates for each dietary group. The x-axis specifies the fold-changes (FC), and the y-axis specifies the negative logarithm to the base 10 of the p-values. Filtering criteria for differentially expressed genes (DEGs) is  $FC = \pm 2.0$  and  $p\text{-value} < 0.05$ . Red and green dots represent probe sets for transcripts expressed at significantly higher or lower levels than the HGD without sEHI treatment, respectively.

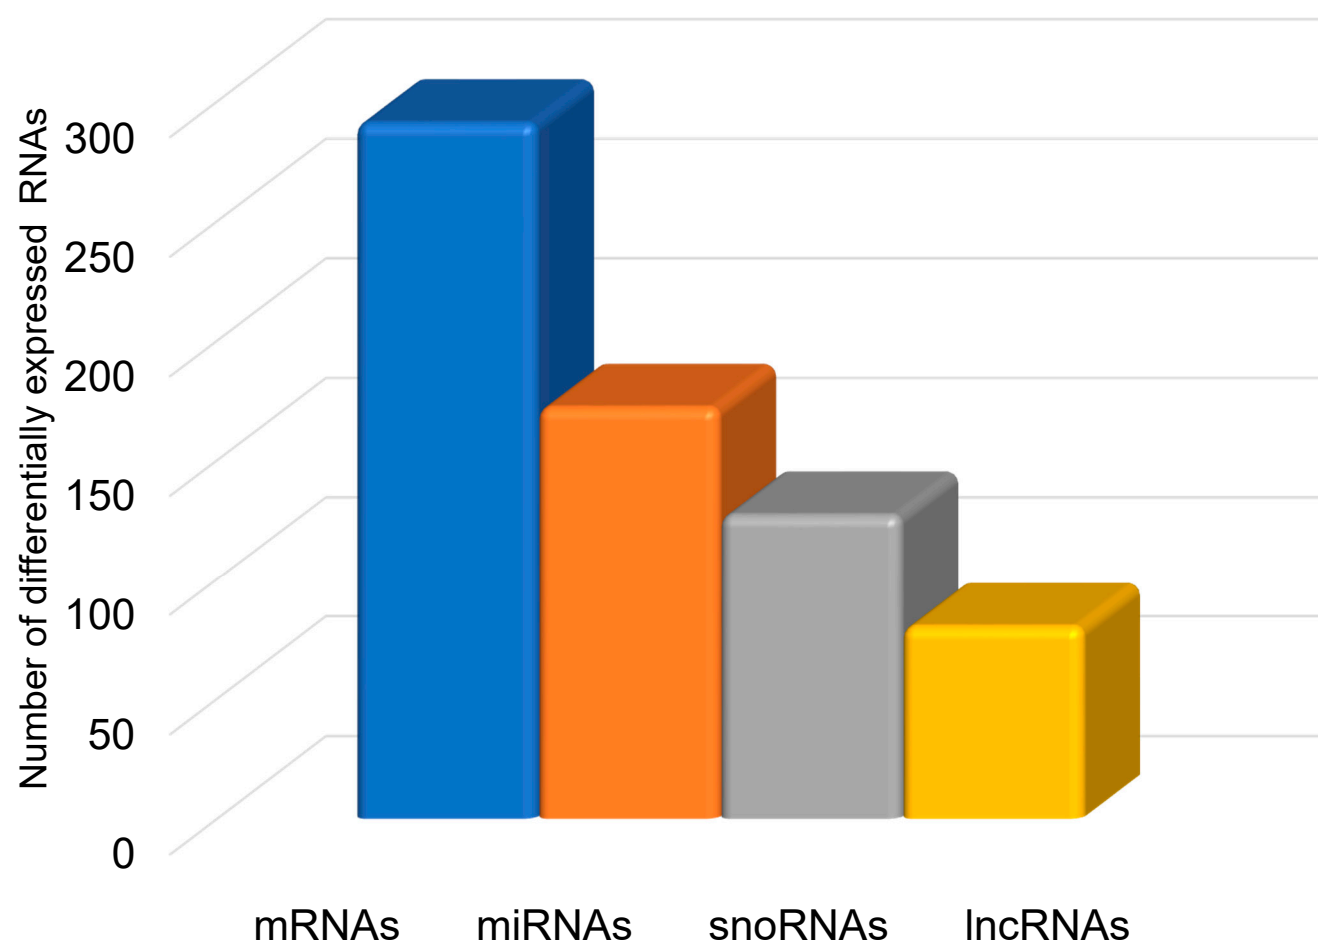

**Supplemental Figure S10: Distribution of differentially expressed RNAs in hippocampal microvessels for the high glycemic diet (HGD) with soluble epoxide hydrolase inhibitor (sEHI) compared to without sEHI treatment.** Number of differentially expressed protein coding (messenger RNAs=mRNAs, blue) and non-protein coding RNAs (microRNAs=miRNAs, orange; small nucleolar RNA=snoRNAs, grey; and long non-coding RNA=lncRNAs, yellow) in hippocampal microvessels from the high glycemic diet (HGD) with soluble epoxide hydrolase inhibitor (sEHI) compared to without sEHI treatment. The data are shown for three biological replicates for each dietary group.



Supplemental Figure S11

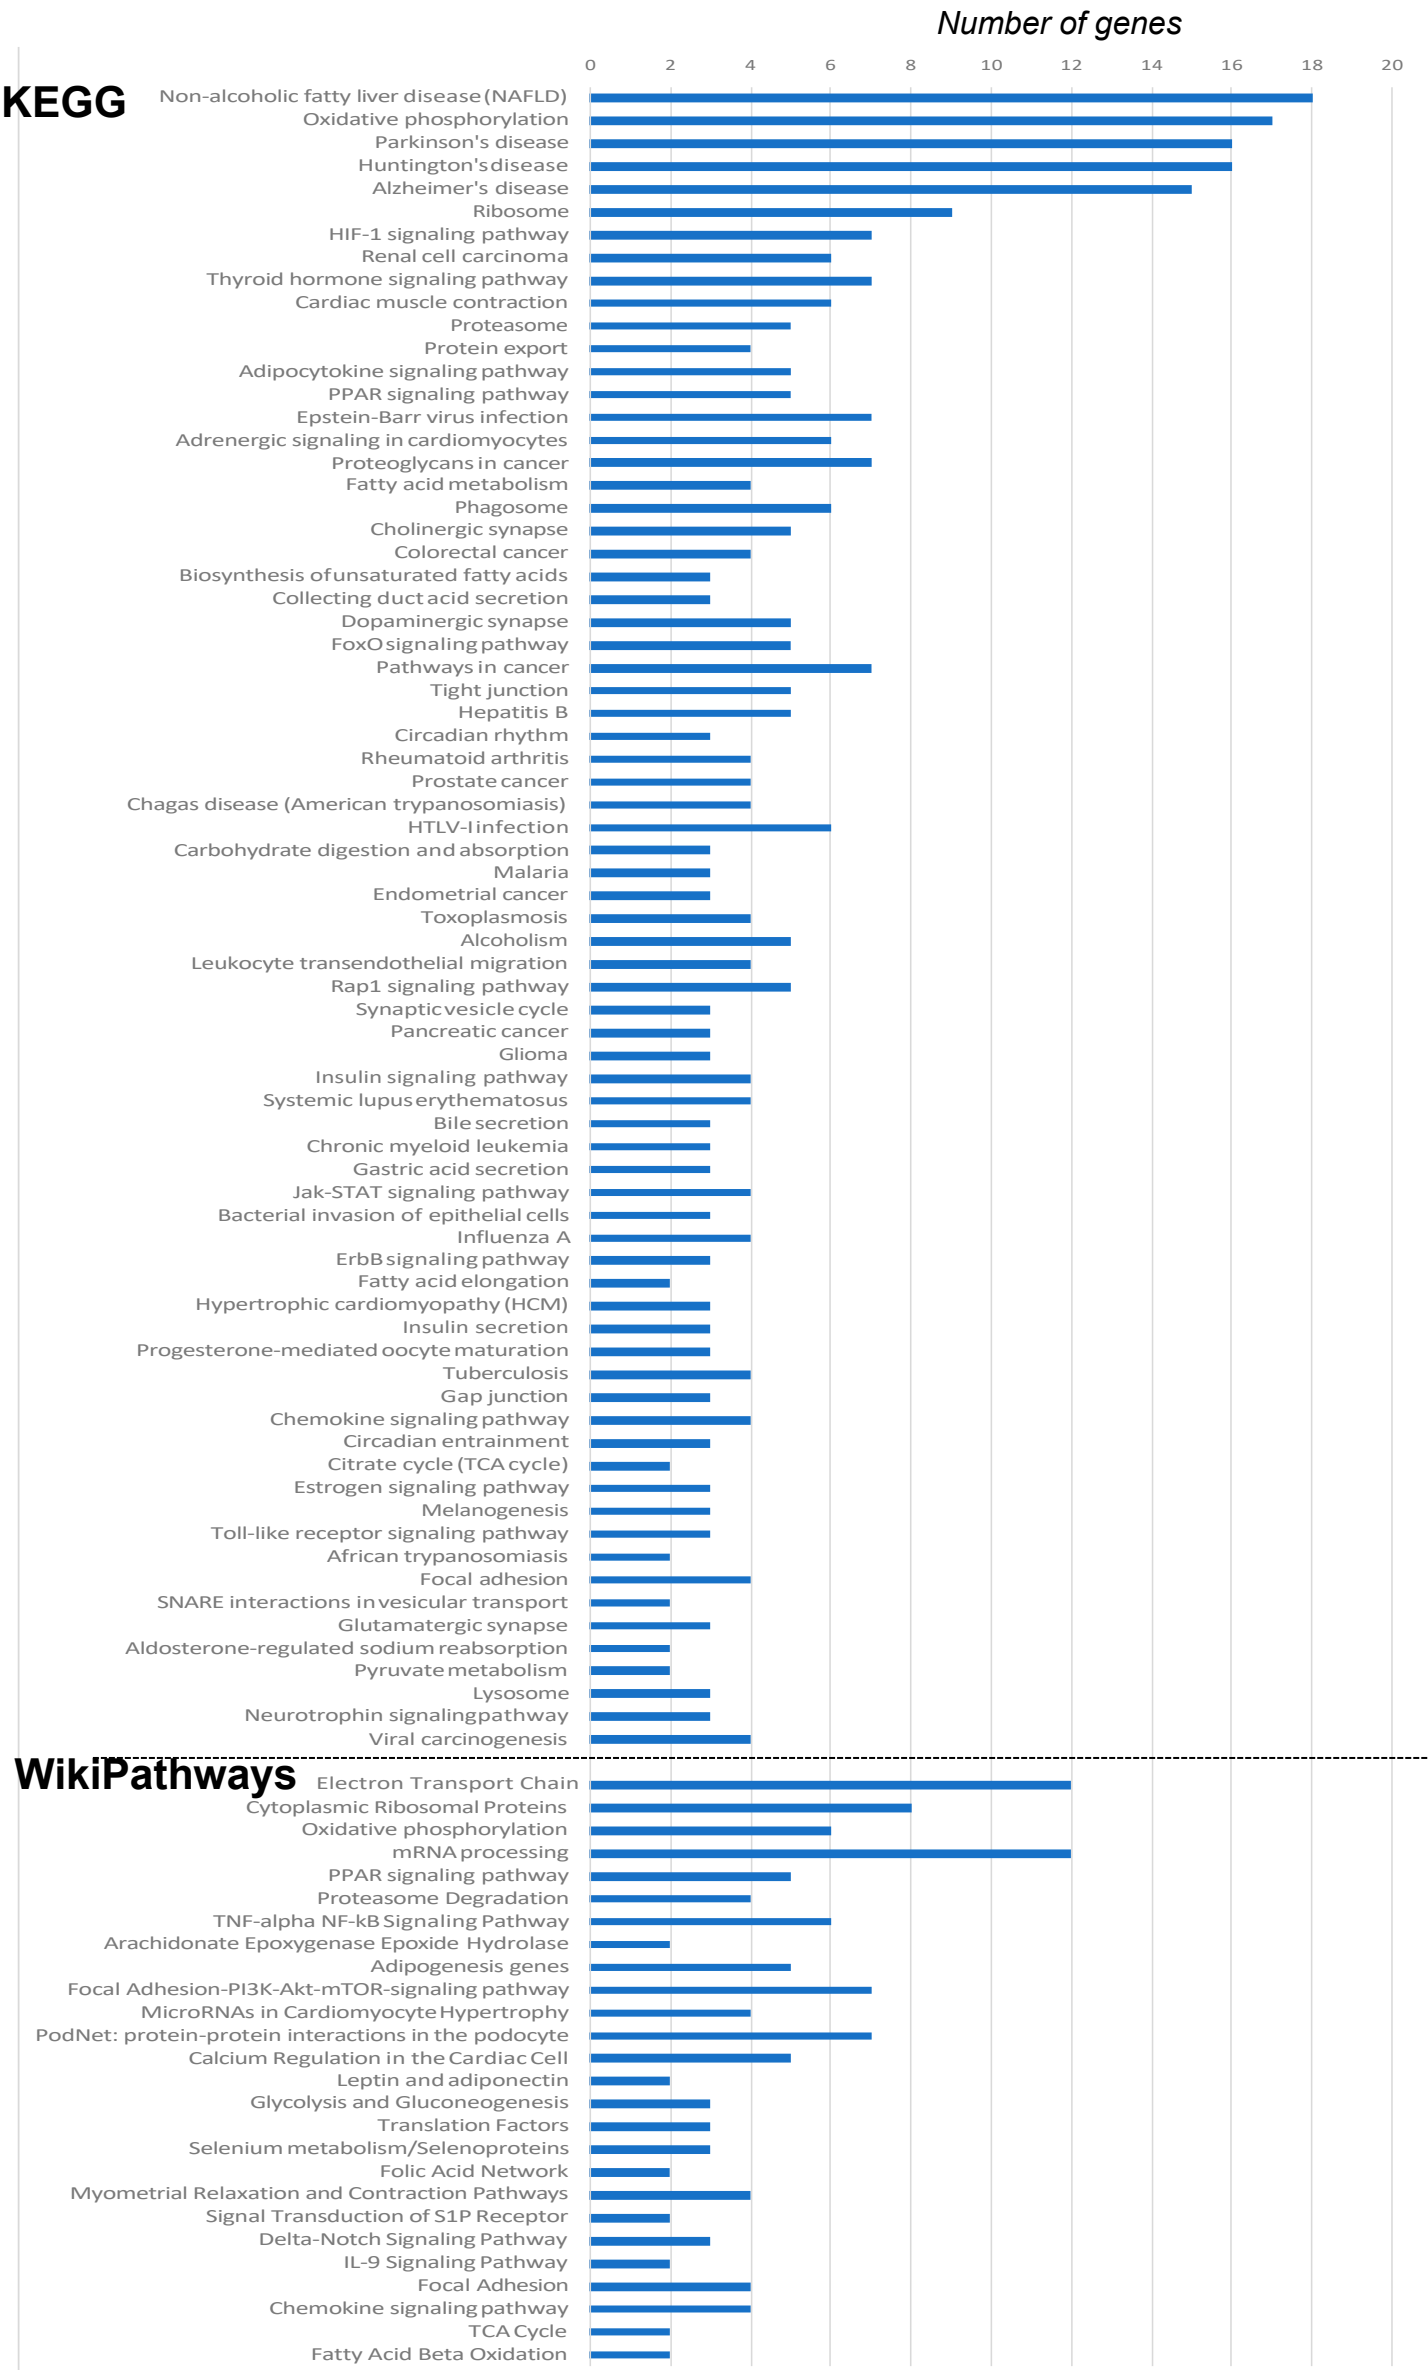

**Supplemental Figure S11: Histogram of protein coding differentially expressed genes pathways in hippocampal microvessels for the high glycemic diet (HGD) with soluble epoxide hydrolase inhibitor (sEHI) compared to without sEHI treatment.** Significant cellular pathways ( $p < 0.05$ ) of differentially expressed protein coding genes in hippocampus microvessels from the high glycemic diet (HGD) with soluble epoxide hydrolase inhibitor (sEHI) compared to without sEHI treatment. The data are shown for three biological replicates for each dietary group. KEGG and WikiPathways were identified using Genetrial2 online database.







Biocarta

KEGG

WikiPathways

Number of genes

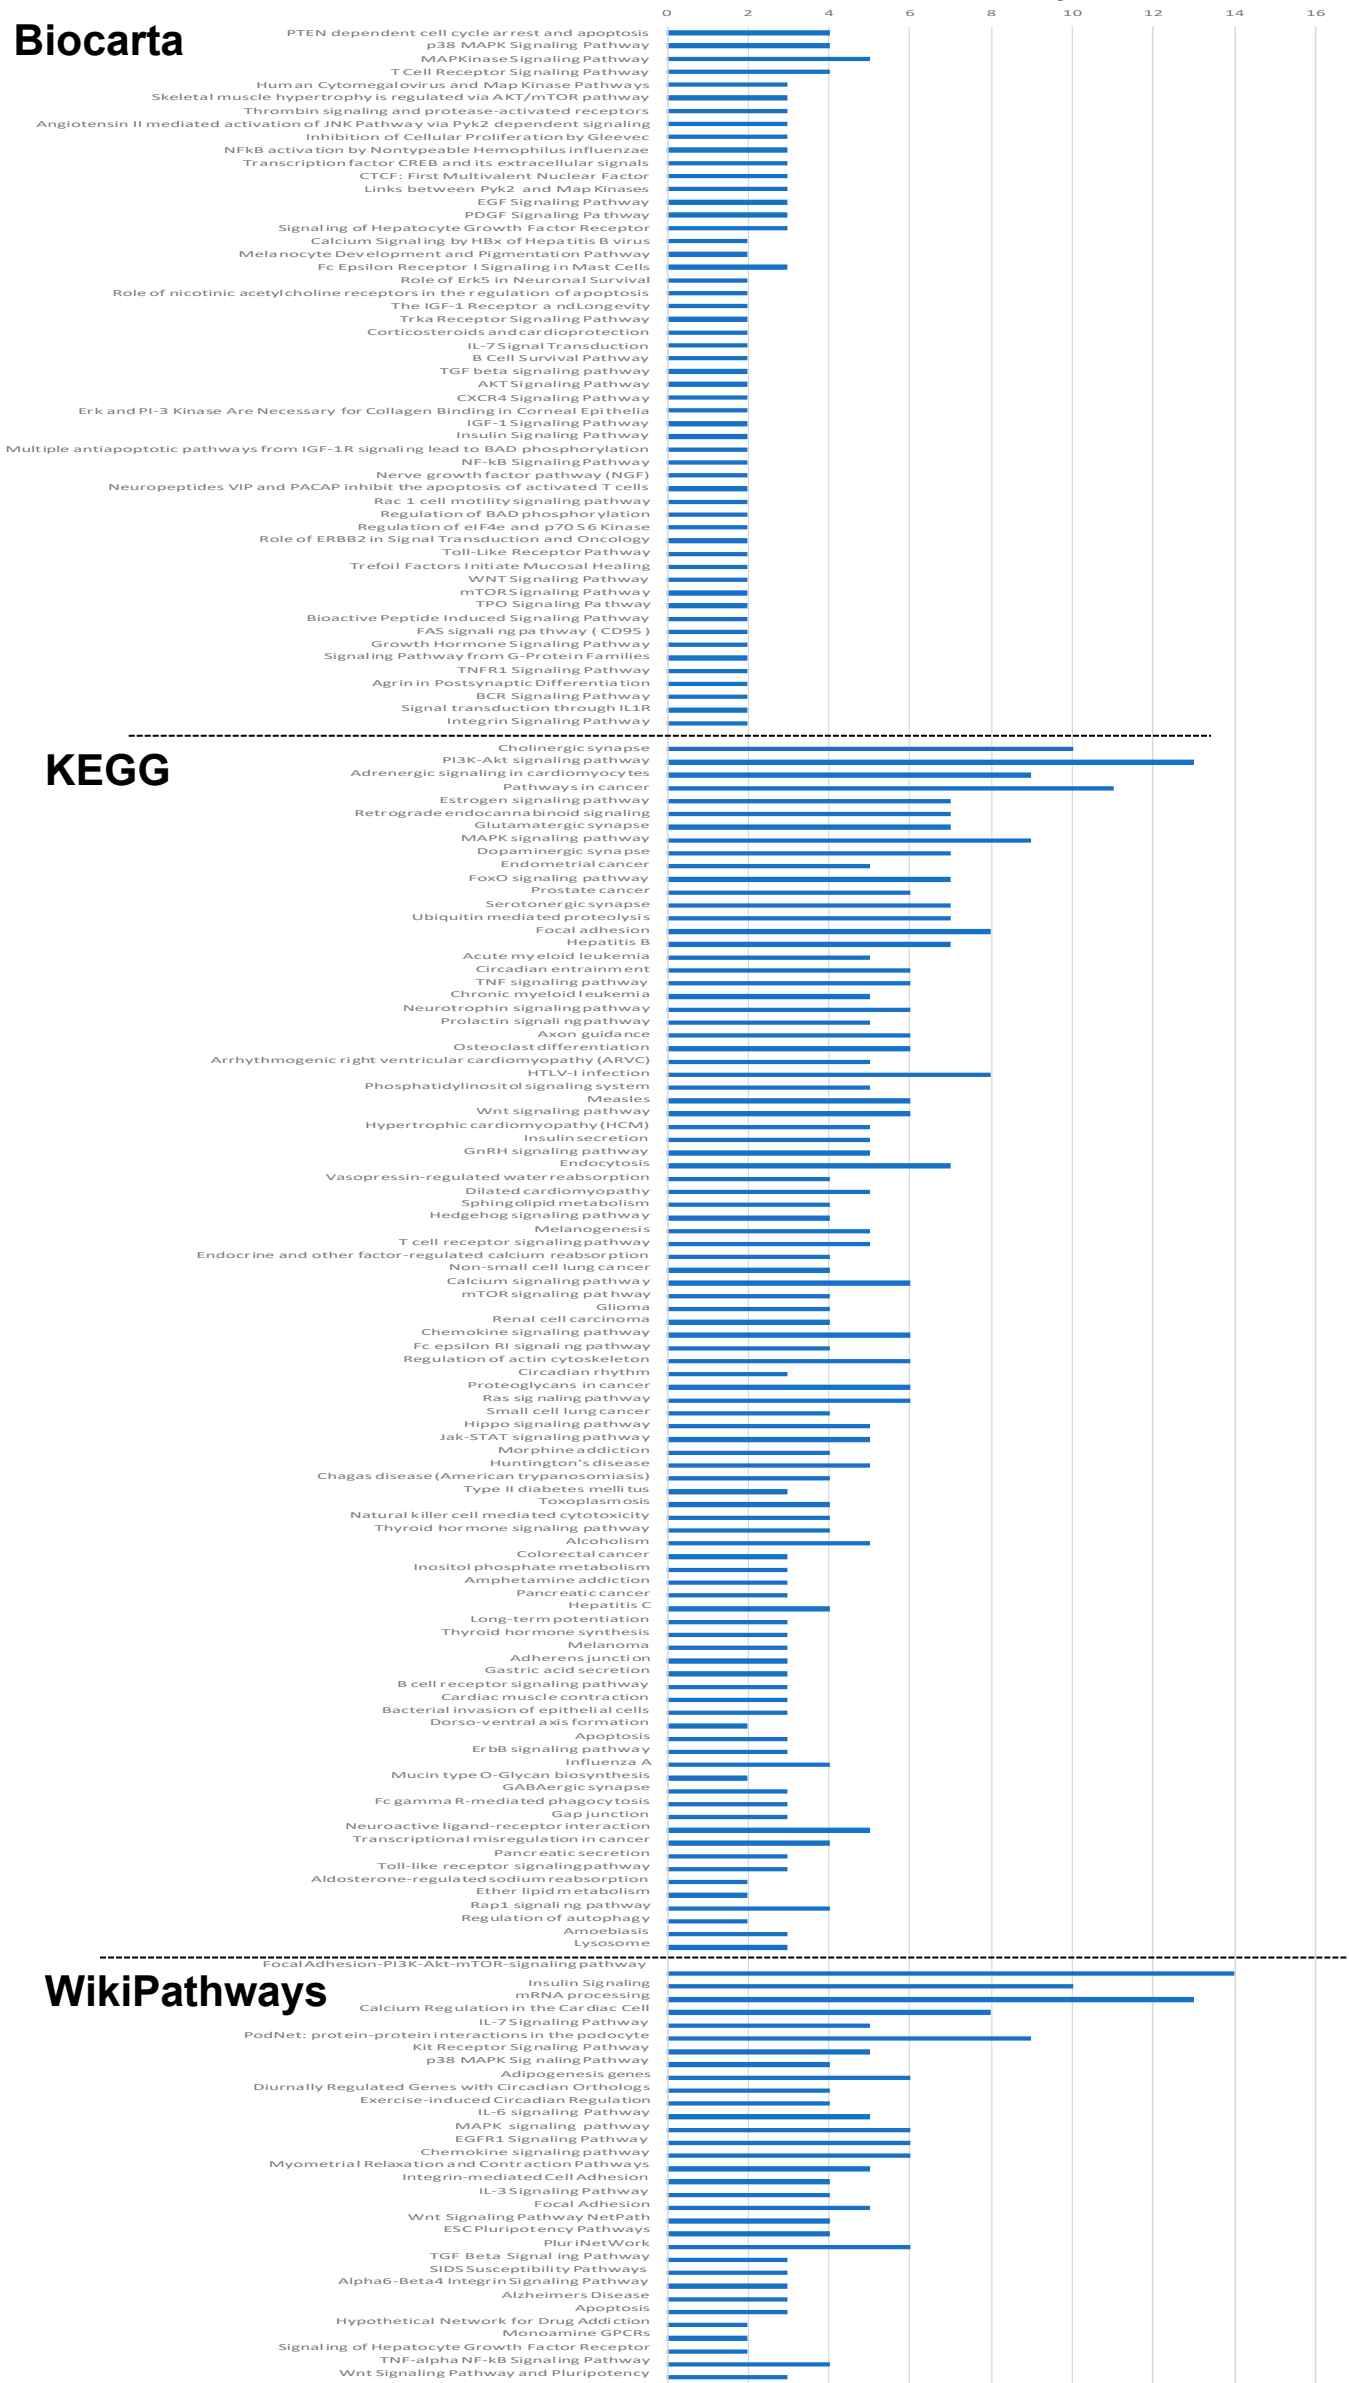

**Supplemental Figure S14: Histogram of differentially expressed miRNA targets pathways in hippocampal microvessels for the high glycemic diet (HGD) with soluble epoxide hydrolase inhibitor (sEHI) compared to without sEHI treatment.** Significant cellular pathways ( $p < 0.05$ ) of differentially expressed miRNA target genes in hippocampus microvessels of the high glycemic diet (HGD) with soluble epoxide hydrolase inhibitor (sEHI) compared to without sEHI treatment. The data are shown for three biological replicates for each dietary group. Biocarta, KEGG and WikiPathways were identified using Genetrial2 online database.

Supplemental Figure S15

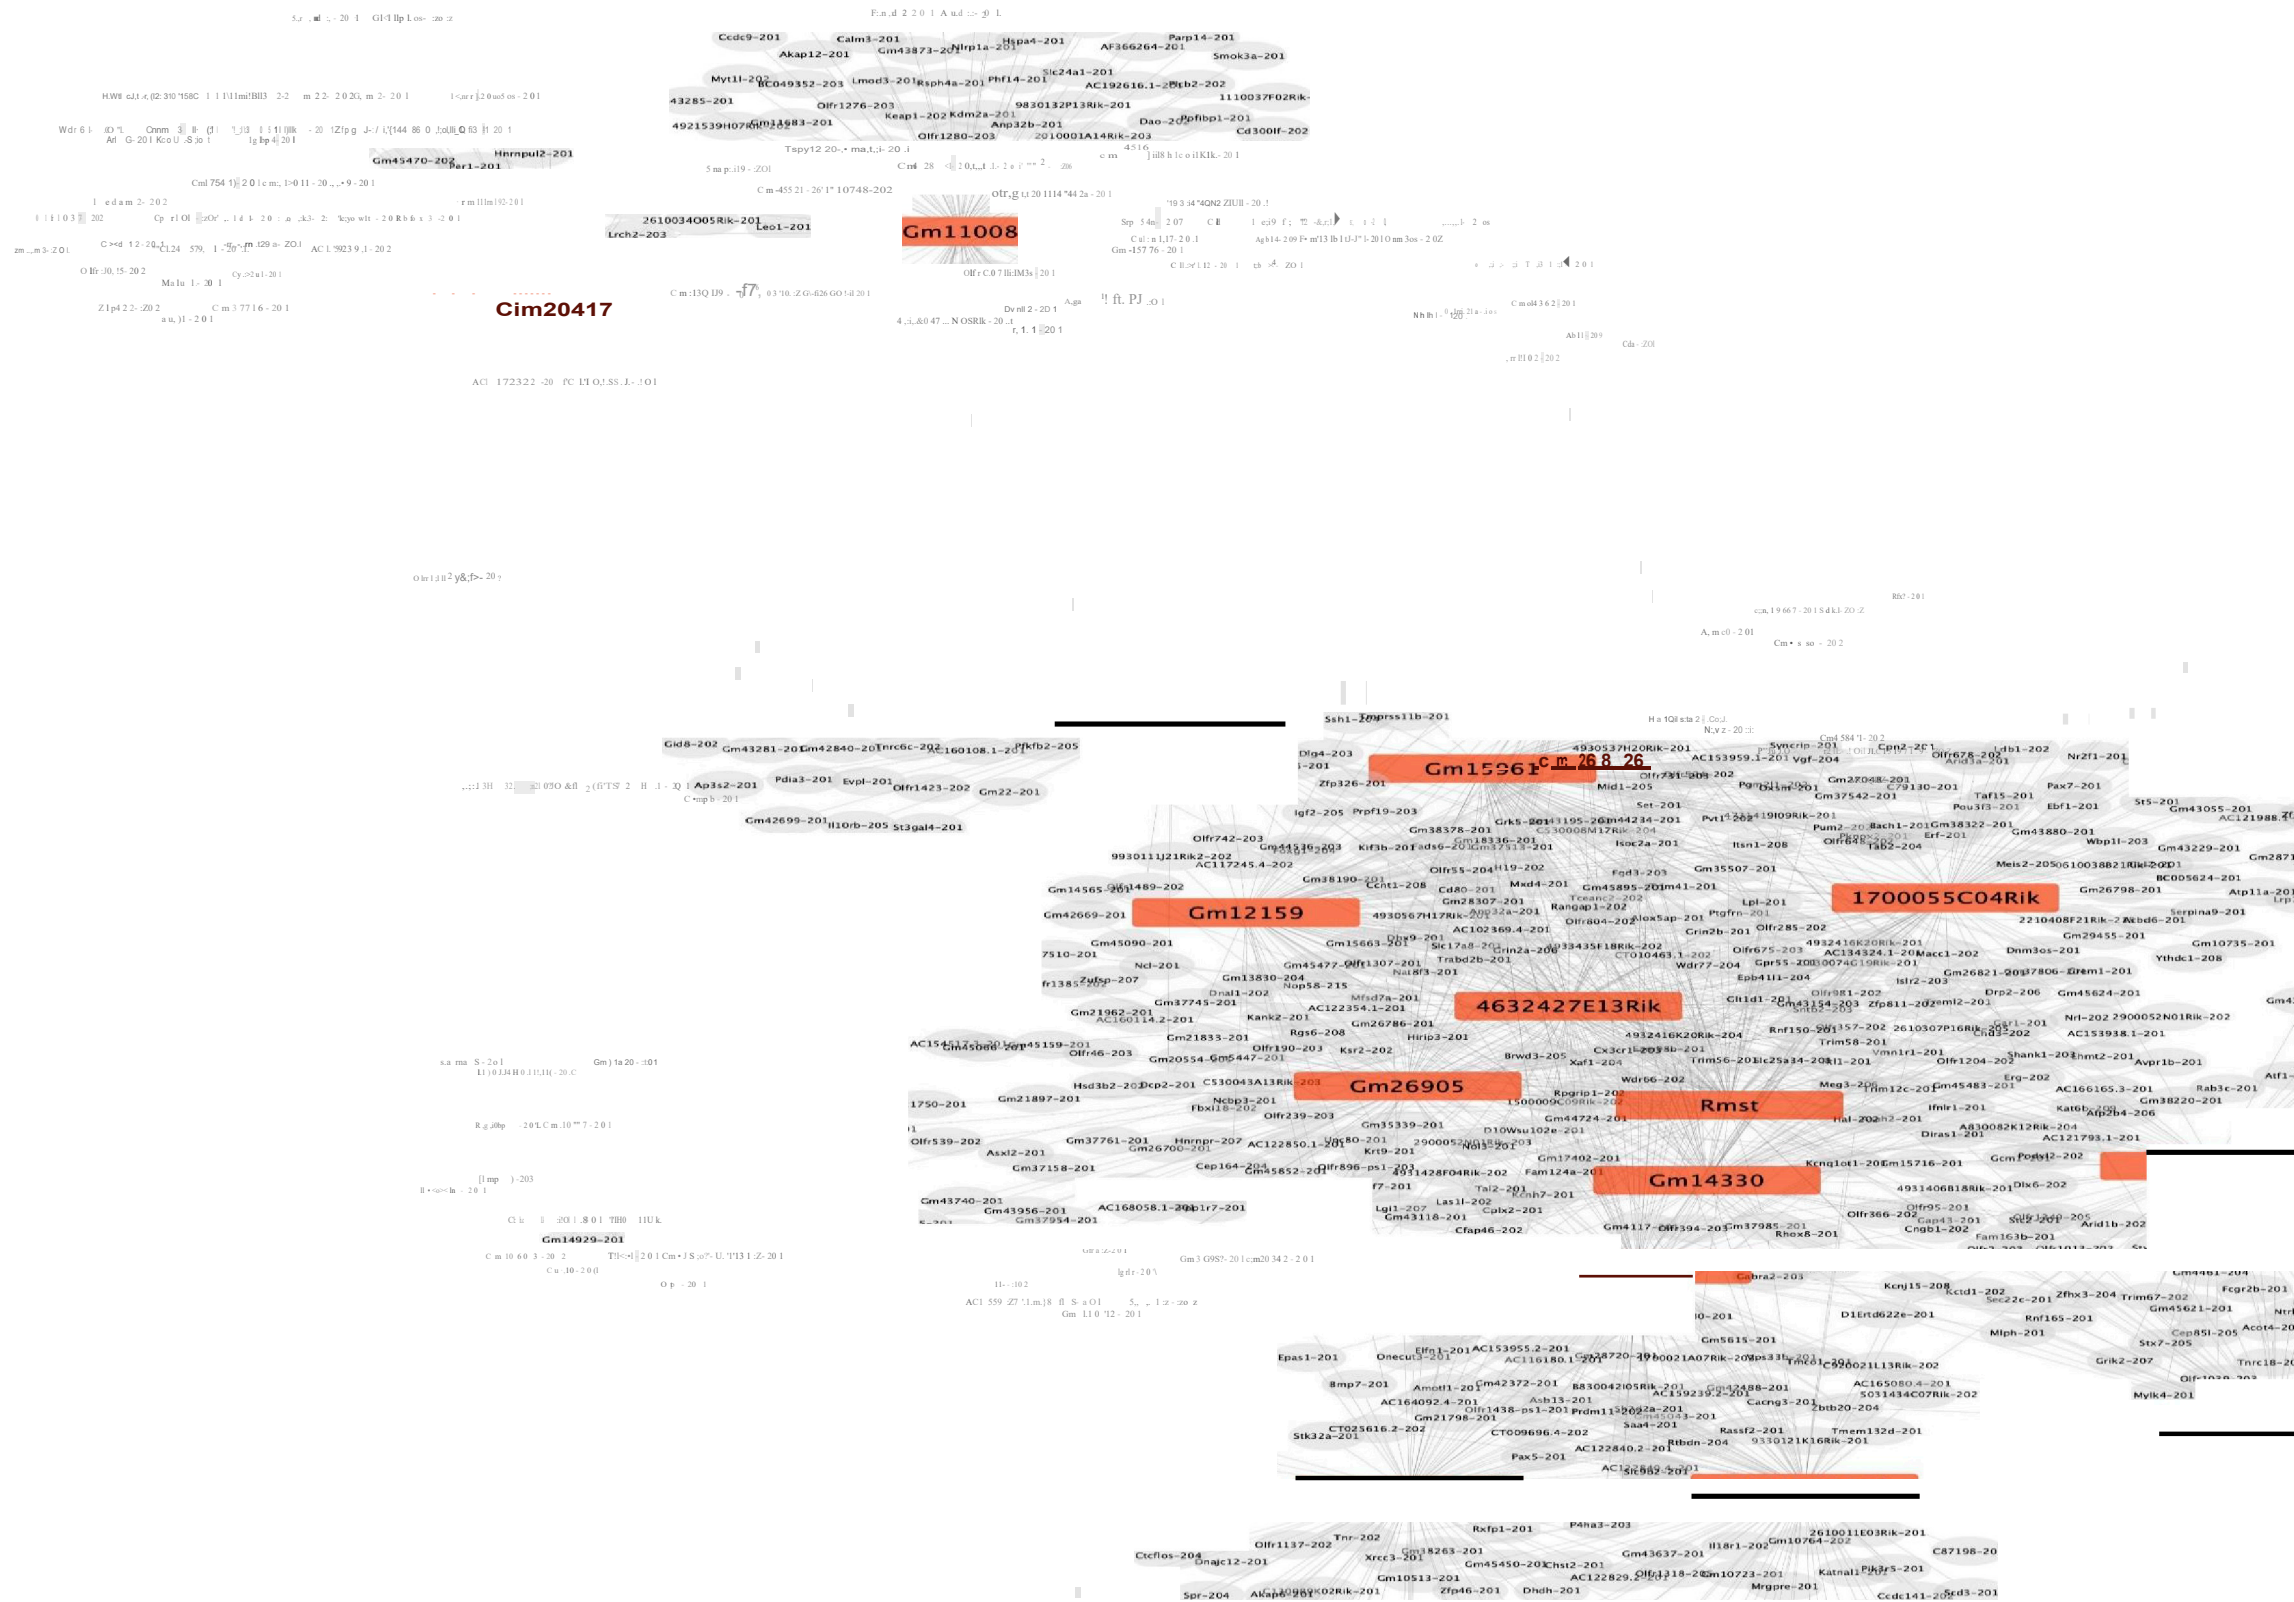

**Supplemental Figure S15. Target gene networks of differentially expressed lncRNAs in hippocampal microvessels for the high glycemic diet (HGD) with and without soluble epoxide hydrolase inhibitor (sEHI).** The network of interactions between differentially expressed lncRNAs (red boxes) and their target genes (purple circles) of the high glycemic diet (HGD) with soluble epoxide hydrolase inhibitor (sEHI) when compared to HGD without inhibitor. The data are shown for three biological replicates for each dietary group. LncRNA targets were identified using LncRRIs search and Rtools CBRC databases.

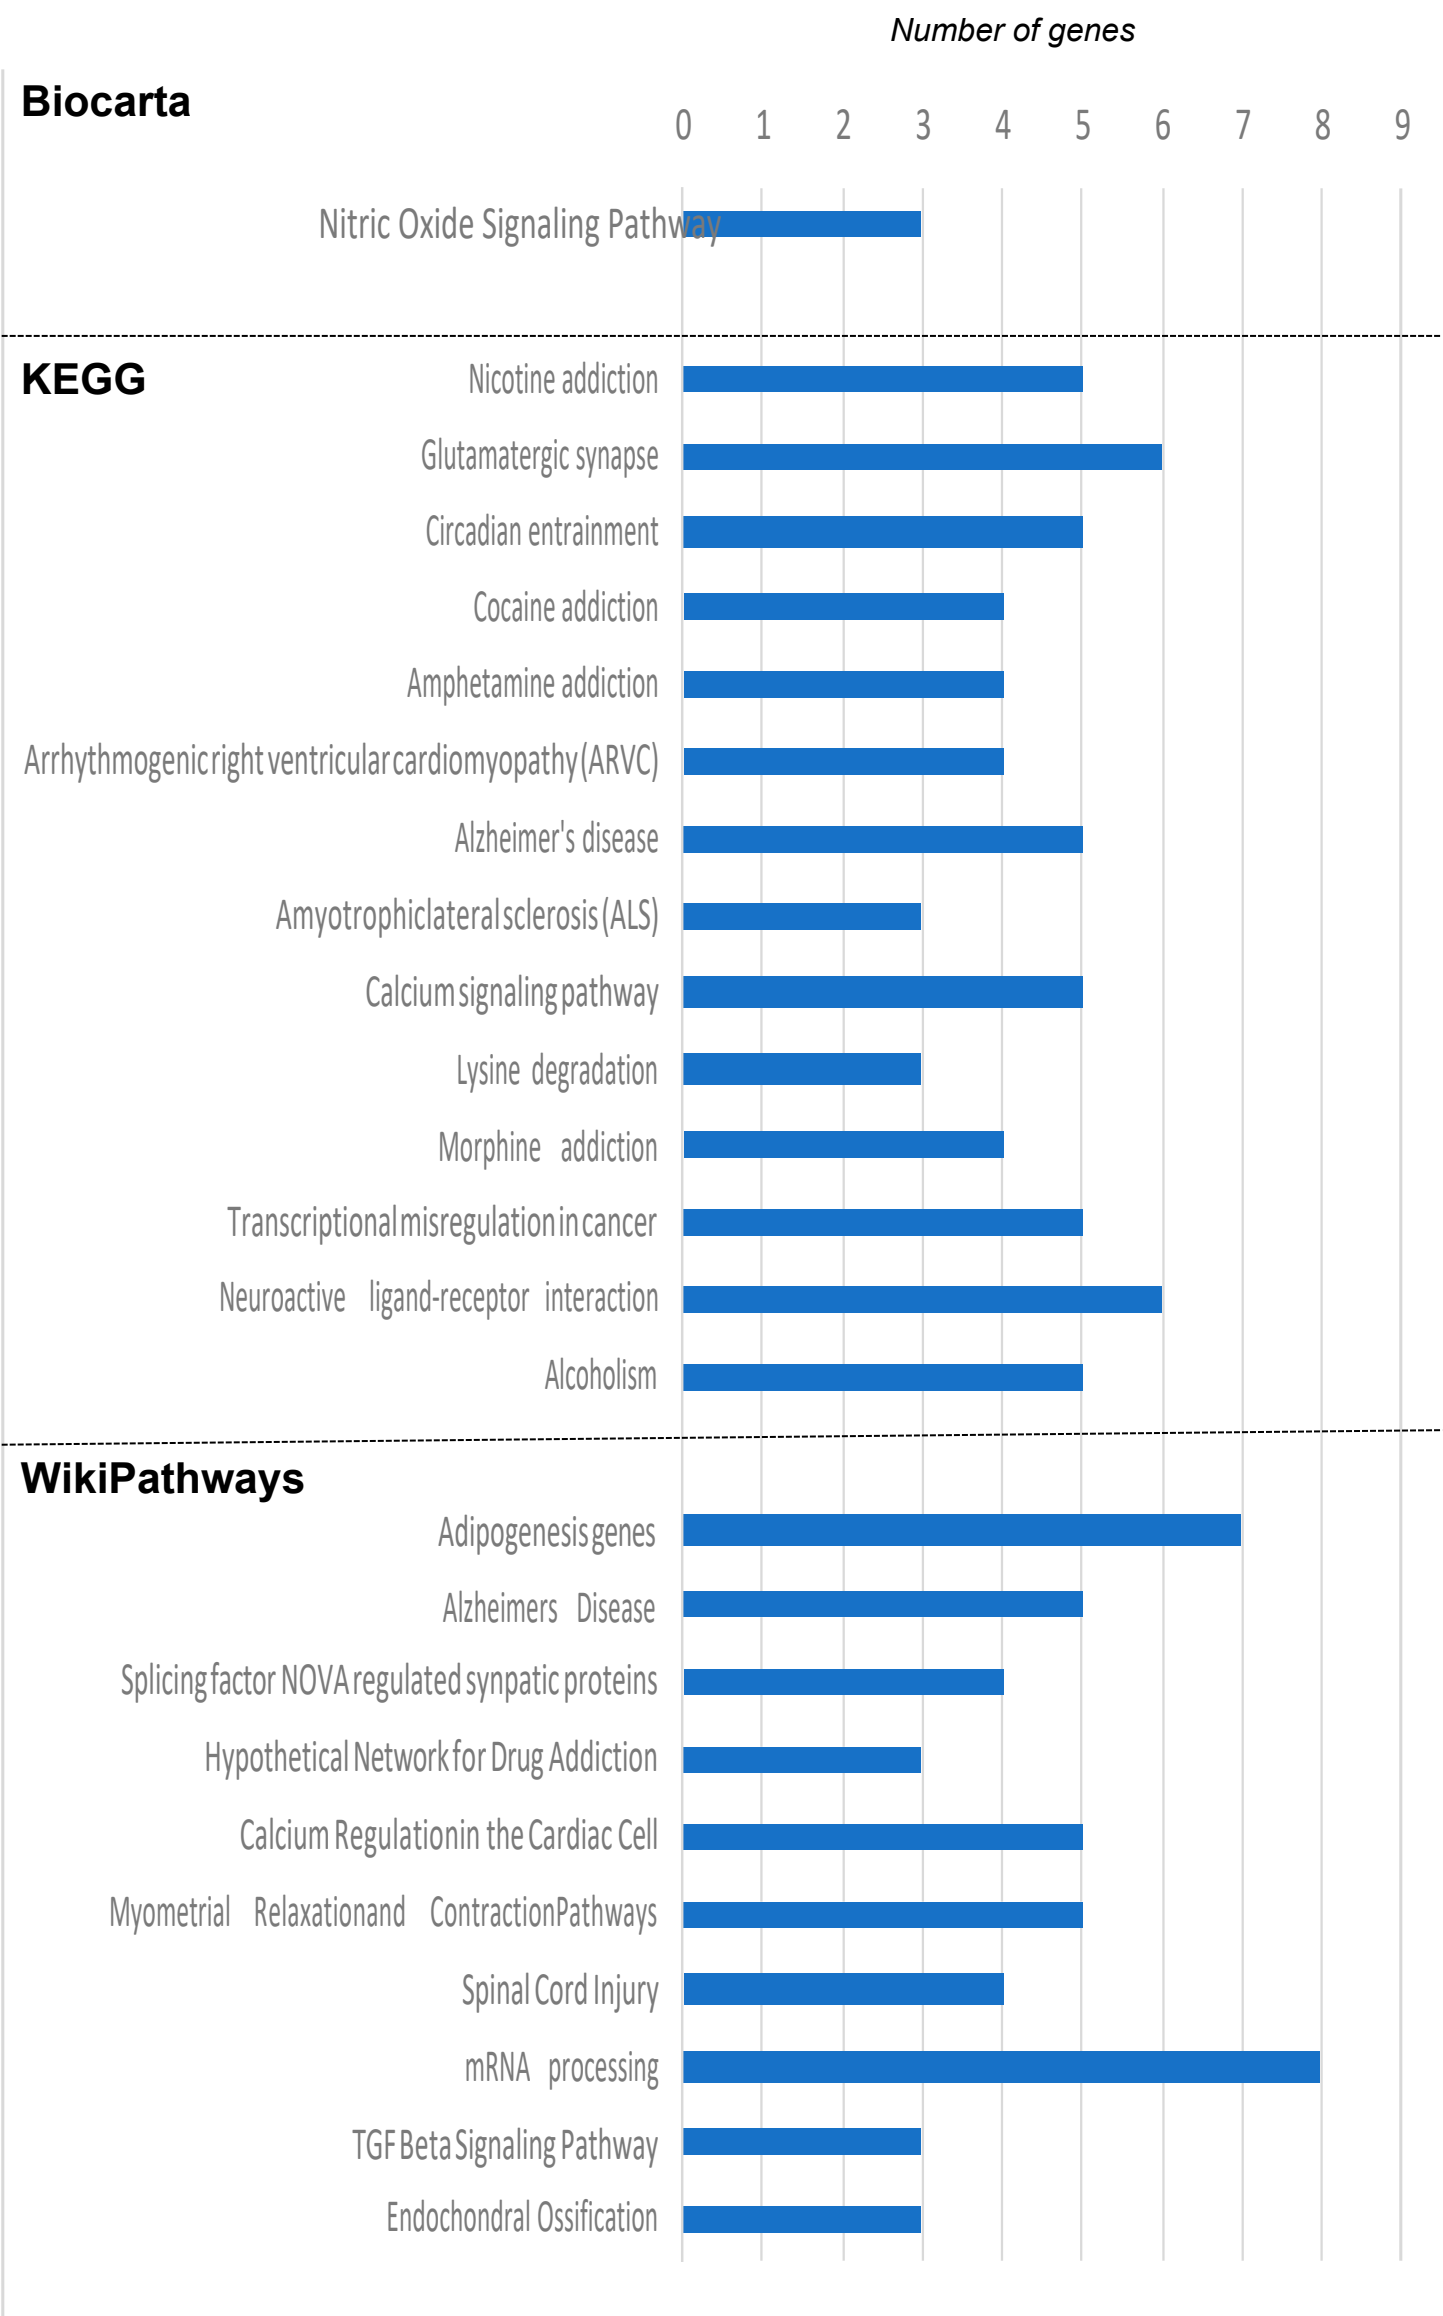

**Supplemental Figure S16: Histogram of differentially expressed lncRNA targets pathways in hippocampal microvessels for the high glycemic diet (HGD) with soluble epoxide hydrolase inhibitor (sEHI) compared to without sEHI treatment.** Significant cellular pathways ( $p < 0.05$ ) of differentially expressed lncRNA target genes in hippocampus microvessels of the high glycemic diet (HGD) with soluble epoxide hydrolase inhibitor (sEHI) compared to without sEHI treatment. The data are shown for three biological replicates for each dietary group. Biocarta, KEGG and WikiPathways were identified using Genetrial2 online database.



**Table S1: Differentially expressed genes for the high glycemic diet (HGD) compared to low glycemic diet (LGD).**

| Gene Symbol        | Description                                                   | Fold Change |
|--------------------|---------------------------------------------------------------|-------------|
| Ppp1r14b           | protein phosphatase 1, regulatory (inhibitor) subunit 1       | 2.21        |
| Gm6117; RP23-192D5 | predicted gene 6117 [Source:MGI Symbol;Acc:MGI:               | -2.02       |
|                    |                                                               | 3.73        |
| Fam205a2; Gm10600  | family with sequence similarity 205, member A2; pre           | 2.02        |
| Gm24400            | predicted gene, 24400 [Source:MGISymbol;Acc:MG                | 19.44       |
| Gm19738            | PREDICTED: predicted gene, 19738, transcript varia            | 3.65        |
| Gm7381             | predicted gene 7381 [Source:MGI Symbol;Acc:MGI:               | 8.66        |
| Dnajc4             | DnaJ (Hsp40) homolog, subfamily C, member 4                   | 2.03        |
| Gm7497             | predicted gene 7497 [Source:MGI Symbol;Acc:MGI:               | 3.35        |
| Gm19767            | PREDICTED: predicted gene, 19767 (Gm19767), mi                | 2.69        |
| Gm24783            | predicted gene, 24783 [Source:MGISymbol;Acc:MG                | -2.5        |
| Brms1l             | breast cancer metastasis-suppressor 1-like                    | 2.87        |
| Jag1               | jagged 1                                                      | 2.28        |
| Snord16a           | small nucleolar RNA, C/D box 16A                              | 4.28        |
| Gm23098            | predicted gene, 23098                                         | -16.65      |
| Gm11037            | predicted gene 11037 [Source:MGI Symbol;Acc:MGI               | -2.66       |
|                    |                                                               | -2.6        |
|                    |                                                               | 2.34        |
|                    |                                                               | 2.55        |
|                    |                                                               | 2.05        |
| Gm16209            | predicted gene 16209 [Source:MGI Symbol;Acc:MGI               | 4.3         |
| Rab24              | RAB24, member RAS oncogene family                             | 2.36        |
| Dctn2              | dynactin 2                                                    | 2.17        |
|                    |                                                               | -8.67       |
| Gm4804             | predicted gene 4804 [Source:MGI Symbol;Acc:MGI:               | 2.24        |
|                    |                                                               | 4.09        |
| Mir5125            | microRNA 5125                                                 | -3.25       |
|                    |                                                               | -3.12       |
| Atp2b4; Mir6903    | ATPase, Ca <sup>++</sup> transporting, plasma membrane 4; mic | 2.15        |
| Gm12428            | predicted gene 12428 [Source:MGI Symbol;Acc:MGI               | 2.59        |
| Dynlrb1            | dynein light chain roadblock-type 1                           | 2.52        |
| Gm1866             | predicted gene 1866 [Source:MGI Symbol;Acc:MGI:               | 2.97        |
|                    |                                                               | -2.49       |
|                    |                                                               | -2.47       |
| Higd2a             | HIG1 domain family, member 2A                                 | 12.28       |
| Gm24621            | predicted gene, 24621 [Source:MGISymbol;Acc:MG                | -2.3        |
| Uck2               | uridine-cytidine kinase 2                                     | 2.59        |
|                    |                                                               | -2.58       |
| Eef2               | eukaryotic translation elongation factor 2                    | 3.37        |
|                    |                                                               | -2.21       |
| Gm3608             | predicted gene 3608 [Source:MGI Symbol;Acc:MGI:               | 3.14        |



|                      |                                                    |       |
|----------------------|----------------------------------------------------|-------|
|                      |                                                    | 2.03  |
| Gm22289              | predicted gene, 22289 [Source:MGI Symbol;Acc:MGI]  | 11.37 |
| Cd248                | CD248 antigen, endosialin                          | 2.23  |
| Slc18b1              | solute carrier family 18, subfamily B, member 1    | 2.33  |
| Cox6a1               | cytochrome c oxidase subunit VIa polypeptide 1     | 2.98  |
| Hist1h2an            | histone cluster 1, H2an                            | 7.16  |
| Ndufa10              | NADH dehydrogenase (ubiquinone) 1 alpha subcomp    | 2.26  |
|                      |                                                    | 2.51  |
| Gba                  | glucosidase, beta, acid                            | 2.2   |
|                      |                                                    | -2.61 |
| Gm10171              | predicted gene 10171                               | 4.98  |
|                      |                                                    | 2.95  |
|                      |                                                    | 2.95  |
| Hist2h4              | histone cluster 2, H4                              | 2.86  |
| Gm12074              | predicted gene 12074 [Source:MGI Symbol;Acc:MGI]   | 2.39  |
| Gm13050              | predicted gene 13050 [Source:MGI Symbol;Acc:MGI]   | 2.14  |
| Gm17756              | PREDICTED: predicted gene, 17756 (Gm17756), m      | 2.17  |
| Cox5b                | cytochrome c oxidase subunit Vb                    | 2.99  |
| LOC100861862         | PREDICTED: uncharacterized LOC100861862 (LOC       | 3.16  |
| Lonp2                | lon peptidase 2, peroxisomal                       | 2.27  |
|                      |                                                    | -2.51 |
| LOC100861832         | PREDICTED: uncharacterized LOC100861832 (LOC       | 2.77  |
|                      |                                                    | -2.47 |
|                      |                                                    | -2.1  |
| Apoa1bp              | apolipoprotein A-I binding protein                 | 2.95  |
| Plxnc1               | plexin C1                                          | 2.03  |
| Gm5612               | predicted gene 5612 [Source:MGI Symbol;Acc:MGI]    | 2.53  |
| Gm14292              | predicted gene 14292 [Source:MGI Symbol;Acc:MGI]   | 6.89  |
| Epm2aip1             | EPM2A (laforin) interacting protein 1              | 2.1   |
| AY036118             | cDNA sequence AY036118                             | 2.15  |
| Ranbp2-ps2           | RAN binding protein 2, pseudogene 2                | -2.01 |
| Gm13132              | predicted gene 13132 [Source:MGI Symbol;Acc:MGI]   | -3.6  |
|                      |                                                    | -3.15 |
| 13298; Fam205a4; Gm2 | predicted gene 13298 (Gm13298), mRNA.; family wi   | 2.28  |
| LOC100503279         | PREDICTED: uncharacterized LOC100503279 (LOC       | 2.94  |
| Hivep1               | human immunodeficiency virus type I enhancer bindi | 2.5   |
| Ndufa13              | NADH dehydrogenase (ubiquinone) 1 alpha subcomp    | 5.6   |
| Rngtt                | RNA guanylyltransferase and 5-phosphatase; RNA gu  | 2.35  |
| Gm19974              | PREDICTED: predicted gene, 19974 (Gm19974), mi     | 2.81  |
| Slc38a3              | solute carrier family 38, member 3                 | 2.04  |
|                      |                                                    | -2.02 |
| Stk39                | serine/threonine kinase 39                         | 2.28  |
| Slc35b1              | solute carrier family 35, member B1                | 2.3   |
| Hist1h2aj            | histone cluster 1, H2aj                            | 6.89  |

|                     |                                                          |       |
|---------------------|----------------------------------------------------------|-------|
| Gm1974              | PREDICTED: predicted gene 1974 (Gm1974), misc            | 2.03  |
| Gm11367             | predicted gene 11367 [Source:MGI Symbol;Acc:MGI          | 3.49  |
| Gm12816             | predicted gene 12816                                     | 2.08  |
|                     |                                                          | 9.98  |
| Mir6928             | microRNA 6928                                            | -2.29 |
| Mir5099             | microRNA 5099                                            | -2.11 |
| Mir5099             | microRNA 5099                                            | -2.11 |
| LOC100861650        | PREDICTED: uncharacterized LOC100861650, trans           | 3.47  |
| Lrp1                | low density lipoprotein receptor-related protein 1       | 2.02  |
| Prpf8               | pre-mRNA processing factor 8                             | 3.51  |
| Gatad1              | GATA zinc finger domain containing 1                     | 2.35  |
| Gm13862             | predicted gene 13862 [Source:MGI Symbol;Acc:MGI          | 2.48  |
| Crry-ps             | complement receptor related protein, pseudogene [So      | 2.43  |
| Gm7204              | predicted pseudogene 7204 [Source:MGI Symbol;Acc         | 2.05  |
| Ppa1                | pyrophosphatase (inorganic) 1                            | 2.28  |
| Vim                 | vimentin                                                 | 2.32  |
| Gm9625              | predicted gene 9625 [Source:MGI Symbol;Acc:MGI:          | 2.75  |
|                     |                                                          | -3.06 |
| Cdc40               | cell division cycle 40                                   | 2.07  |
|                     |                                                          | 2.99  |
| Pcna-ps2            | proliferating cell nuclear antigen pseudogene 2 [Sourc   | 2.55  |
| Zfp361l             | zinc finger protein 36, C3H type-like 1                  | 2.04  |
| Gm10233             | predicted pseudogene 10233 [Source:MGI Symbol;Ac         | 5.79  |
| Ankmy2              | ankyrin repeat and MYND domain containing 2              | 2.16  |
| Gm26361             | predicted gene, 26361 [Source:MGI Symbol;Acc:MG          | -2.07 |
|                     |                                                          | 9.39  |
|                     |                                                          | 3.08  |
| Eif5a13-ps          | eukaryotic translation initiation factor 5A-like 3, pseu | 3.15  |
| Hist1h2af           | histone cluster 1, H2af                                  | 3.84  |
| Scp2-ps2            | sterol carrier protein 2, pseudogene 2 [Source:MGI Sy    | 2.35  |
| Mlc1                | megalencephalic leukoencephalopathy with subcortic       | 2.23  |
| Gm2174              | predicted gene 2174 [Source:MGI Symbol;Acc:MGI:          | 2.64  |
| Gm22930             | predicted gene, 22930                                    | 2.61  |
| Gstp1               | glutathione S-transferase, pi 1                          | 2.52  |
|                     |                                                          | -2.17 |
| Dap3                | death associated protein 3                               | 2.05  |
| Wdr74               | WD repeat domain 74                                      | 2.23  |
| Cox5a               | cytochrome c oxidase subunit Va                          | 6.85  |
| LOC100862246        | PREDICTED: uncharacterized LOC100862246 (LOC             | 3.73  |
| Pnmal1              | PNMA-like 1                                              | 2.14  |
| Gm6444              | predicted gene 6444 [Source:MGI Symbol;Acc:MGI:          | 4.41  |
| Gm27313             | predicted gene, 27313 [Source:MGI Symbol;Acc:MG          | -2.01 |
| Oxct1               | 3-oxoacid CoA transferase 1                              | 2.13  |
| m15724; RP23-246B24 | predicted gene 15724; novel pseudogene                   | -2.74 |

|               |                                                        |       |
|---------------|--------------------------------------------------------|-------|
| Gm11675       | predicted gene 11675 [Source:MGI Symbol;Acc:MGI]       | 3.26  |
| Gm15530       | predicted gene 15530 [Source:MGI Symbol;Acc:MGI]       | -4.2  |
| Ndufb7        | NADH dehydrogenase (ubiquinone) 1 beta subcomple       | 2.75  |
| Nlk           | nemo like kinase                                       | 2.04  |
| Peg3os        | Peg3 opposite strand                                   | 2.02  |
| Ndufb6        | NADH dehydrogenase (ubiquinone) 1 beta subcomple       | 3.27  |
|               |                                                        | 2.12  |
| Pcna          | proliferating cell nuclear antigen                     | 2.46  |
|               |                                                        | -2.85 |
| Snapc1        | small nuclear RNA activating complex, polypeptide 1    | 2.1   |
|               |                                                        | 4.55  |
| Gm8927        | predicted gene 8927 [Source:MGI Symbol;Acc:MGI]        | 2.09  |
| Nucb2         | nucleobindin 2                                         | 2.21  |
| 2900011O08Rik | RIKEN cDNA 2900011O08 gene                             | 2.59  |
| Mir8095       | microRNA 8095                                          | -3.67 |
| Ighv5-12-4    | Ighv5-12-4 immunoglobulin heavy variable 5-12-4        | -2.5  |
|               |                                                        | 6.25  |
| Rheb          | Ras homolog enriched in brain                          | 2.15  |
| Gabra3        | gamma-aminobutyric acid (GABA) A receptor, subun       | 2.45  |
| Gm7286        | predicted gene 7286 [Source:MGI Symbol;Acc:MGI]        | 3.1   |
| Gm14049       | predicted gene 14049 [Source:MGI Symbol;Acc:MGI]       | -2.2  |
|               |                                                        | -2.11 |
| Vkorc1        | vitamin K epoxide reductase complex, subunit 1         | 8.9   |
| Cisd1         | CDGSH iron sulfur domain 1                             | 2.64  |
| Gmps          | guanine monophosphate synthetase; guanine monphos      | 2.09  |
| Slc12a2       | solute carrier family 12, member 2                     | 2.48  |
| Sepw1         | selenoprotein W, muscle 1                              | 3.2   |
| Gm13573       | predicted gene 13573 [Source:MGI Symbol;Acc:MGI]       | 3.37  |
| Slc25a18      | solute carrier family 25 (mitochondrial carrier), memb | 2.4   |
|               |                                                        | 3.25  |
|               |                                                        | -3.26 |
| Rabac1        | Rab acceptor 1 (prenylated)                            | 4.41  |
|               |                                                        | -5.06 |
| Ranbp2-ps8    | RAN binding protein 2, pseudogene 8 [Source:MGI S      | -2.23 |
|               |                                                        | 4.61  |
| Gabbr2        | gamma-aminobutyric acid (GABA) B receptor, 2; Syr      | 2.14  |
| Sdhb          | succinate dehydrogenase complex, subunit B, iron sul   | 2.18  |
|               |                                                        | 2.22  |
| Snord14e      | small nucleolar RNA, C/D box 14E                       | 16.58 |
| Rpl18-ps2     | ribosomal protein L18, pseudogene 2; 60S ribosomal     | 5.33  |
| Ost4          | oligosaccharyltransferase 4 homolog (S. cerevisiae)    | 2.43  |
| Uchl1         | ubiquitin carboxy-terminal hydrolase L1                | 2.89  |
| Clic4         | chloride intracellular channel 4 (mitochondrial)       | 2.36  |
| Gm11511       | predicted gene 11511 [Source:MGI Symbol;Acc:MGI]       | 3.21  |

|                |                                                                          |       |
|----------------|--------------------------------------------------------------------------|-------|
| LOC100862216   | PREDICTED: uncharacterized LOC100862216, trans                           | 2.63  |
| Gm12481        | predicted gene 12481                                                     | 3.45  |
| Gstp2          | glutathione S-transferase, pi 2                                          | 2.24  |
| Acta2          | actin, alpha 2, smooth muscle, aorta                                     | 3.33  |
| LOC100862063   | PREDICTED: uncharacterized LOC100862063 (LOC                             | 2.23  |
|                |                                                                          | -5.55 |
| Resp18         | regulated endocrine-specific protein 18                                  | 8.51  |
|                |                                                                          | -2.77 |
|                |                                                                          | 2.96  |
| Gm13396        | predicted gene 13396 [Source:MGI Symbol;Acc:MGI                          | -2.21 |
| Cd81           | CD81 antigen                                                             | 4.17  |
| Gm17383        | predicted gene, 17383 [Source:MGI Symbol;Acc:MGI                         | 11.34 |
| Tgfb3          | transforming growth factor, beta 3                                       | 2.17  |
| Sdha           | succinate dehydrogenase complex, subunit A, flavopr                      | 2.3   |
| Tuba1b         | tubulin, alpha 1B                                                        | 3.38  |
|                |                                                                          | 2.66  |
| Atp1b2         | ATPase, Na <sup>+</sup> /K <sup>+</sup> transporting, beta 2 polypeptide | 2.67  |
| Gm10273        | predicted pseudogene 10273 [Source:MGI Symbol;Acc:MGI                    | 4.31  |
|                |                                                                          | 2.08  |
|                |                                                                          | -2.07 |
| Gm25732        | predicted gene, 25732 [Source:MGI Symbol;Acc:MGI                         | 2.01  |
| LOC100862384   | PREDICTED: uncharacterized LOC100862384 (LOC                             | 2.52  |
| Abhd3          | abhydrolase domain containing 3                                          | 2.26  |
| Tsn            | translin                                                                 | 2.64  |
|                |                                                                          | -2.01 |
| Dcn            | decorin                                                                  | 6.26  |
|                |                                                                          | -2.47 |
| Atp5b          | ATP synthase, H <sup>+</sup> transporting mitochondrial F1 com           | 3     |
|                |                                                                          | 4.29  |
| Atp5l2-ps      | ATP synthase, H <sup>+</sup> transporting, mitochondrial FO co           | 5.26  |
| Gm19496        | PREDICTED: predicted gene, 19496 (Gm19496), mi                           | 5.34  |
|                |                                                                          | -3.29 |
| Ctsb           | cathepsin B                                                              | 2.44  |
| Kif5a          | kinesin family member 5A                                                 | 3.39  |
|                |                                                                          | 10.62 |
| Gm10051        | predicted pseudogene 10051                                               | 3.21  |
| BC002163       | NADH dehydrogenase Fe-S protein 5 pseudogene; cD                         | 3.36  |
| Cct5           | chaperonin containing Tcp1, subunit 5 (epsilon)                          | 2.33  |
| Hipk3; Mir1902 | homeodomain interacting protein kinase 3; microRNA                       | 2.11  |
| Nol4           | nucleolar protein 4                                                      | 2.11  |
| Gm16238        | predicted gene 16238 [Source:MGI Symbol;Acc:MGI                          | 2.07  |
|                |                                                                          | -2.04 |
| Rassf3         | Ras association (RalGDS/AF-6) domain family memb                         | 2.09  |
|                |                                                                          | -2.54 |

|                     |                                                       |       |
|---------------------|-------------------------------------------------------|-------|
|                     |                                                       | 2.66  |
| Hist1h2al           | histone cluster 1, H2al                               | 2.66  |
| Gm16378             | predicted gene 16378 [Source:MGI Symbol;Acc:MGI       | 5.47  |
| Syn1                | synapsin I                                            | 2.02  |
| Scd2; Mir5114       | stearoyl-Coenzyme A desaturase 2; microRNA 5114       | 4.34  |
|                     |                                                       | 11.08 |
| Gm12254             | predicted gene 12254 [Source:MGI Symbol;Acc:MGI       | 3.62  |
| Spes2               | signal peptidase complex subunit 2 homolog (S. cerev  | 4.57  |
| Clk3                | CDC-like kinase 3                                     | 2.63  |
| Rpsa-ps12           | ribosomal protein SA, pseudogene 12                   | 3.4   |
| Gm14150             | predicted gene 14150                                  | 4.14  |
| Gm25581             | predicted gene, 25581 [Source:MGI Symbol;Acc:MGI      | -2.59 |
| Mir5125             | microRNA 5125                                         | -5.81 |
| Tmem30a             | transmembrane protein 30A                             | 3.47  |
| Babam1              | BRISC and BRCA1 A complex member 1                    | 2.94  |
| Gm5931              | predicted pseudogene 5931 [Source:MGI Symbol;Acc:     | 3.2   |
| Lancl1              | LanC (bacterial lantibiotic synthetase component C)-l | 2.21  |
| Gm12460             | predicted gene 12460 [Source:MGI Symbol;Acc:MGI       | 2.17  |
| Lin7a               | lin-7 homolog A (C. elegans)                          | 2.33  |
| m14209; RP23-464H11 | predicted gene 14209 [Source:MGI Symbol;Acc:MGI       | -2.23 |
| Gm12967             | predicted gene 12967 [Source:MGI Symbol;Acc:MGI       | 2.04  |
| Gm14388             | predicted gene 14388 [Source:MGI Symbol;Acc:MGI       | 2.7   |
| Gm25153             | predicted gene, 25153 [Source:MGI Symbol;Acc:MGI      | -2.23 |
| Hist1h1c            | histone cluster 1, H1c                                | 3.39  |
|                     |                                                       | -2.11 |
| Tmed10              | transmembrane emp24-like trafficking protein 10 (yea  | 3.49  |
| Gm19494             | PREDICTED: predicted gene, 19494, transcript varia    | 5.09  |
|                     |                                                       | -2.32 |
|                     |                                                       | 2.03  |
| Rpl28-ps1           | ribosomal protein L28, pseudogene 1                   | 2.82  |
| Gm17541             | predicted gene, 17541 [Source:MGI Symbol;Acc:MGI      | 6.03  |
| Rps4x               | ribosomal protein S4, X-linked; ribosomal protein S4, | 10.22 |
| Gm19475             | PREDICTED: predicted gene, 19475 (Gm19475), m         | 2.8   |
| Gm15920             | predicted gene 15920 [Source:MGI Symbol;Acc:MGI       | 12.12 |
| LOC100861805        | PREDICTED: uncharacterized LOC100861805 (LOC          | 2.4   |
| Gm16339; RP24-369B4 | predicted gene 16339 [Source:MGI Symbol;Acc:MGI       | -2.49 |
| Gm20775             | predicted gene, 20775 [Source:MGI Symbol;Acc:MGI      | 2.42  |
|                     |                                                       | -3.33 |
| Gm9294              | predicted pseudogene 9294                             | 2.83  |
| Sgpp2               | sphingosine-1-phosphate phosphatase 2                 | 2.24  |
| Gm11273             | predicted gene 11273                                  | 3.51  |
| Gm24590             | predicted gene, 24590 [Source:MGI Symbol;Acc:MGI      | 2.59  |
|                     |                                                       | -3.53 |
| Rmst                | rhabdomyosarcoma 2 associated transcript (non-codin   | 2.24  |

|                     |                                                       |       |
|---------------------|-------------------------------------------------------|-------|
|                     |                                                       | 6.22  |
|                     |                                                       | 3.4   |
| Gm12618             | predicted gene 12618                                  | 3.27  |
| Pcdh9               | protocadherin 9; Synthetic construct Mus musculus cl  | 3.16  |
| Trappc11            | trafficking protein particle complex 11               | 2.34  |
| Rpl4                | ribosomal protein L4                                  | 14.13 |
| Gm6055              | predicted gene 6055                                   | 2.49  |
|                     |                                                       | -2.45 |
|                     |                                                       | -2.41 |
| m3893; 4933409K07Ri | predicted gene 3893; RIKEN cDNA 4933409K07 gen        | 2.11  |
| Crbn                | cereblon; cereblon (Crbn), transcript variant 2, mRNA | 2.12  |
| Mir7053             | microRNA 7053                                         | -2.31 |
|                     |                                                       | 3.92  |
|                     |                                                       | -3.87 |
| Zc2hc1a             | zinc finger, C2HC-type containing 1A                  | 2.33  |
|                     |                                                       | -2.45 |
| LOC100862313        | PREDICTED: uncharacterized LOC100862313, trans        | 2.43  |
| Mpzl1               | myelin protein zero-like 1                            | 2.31  |
|                     |                                                       | 3     |
| Msl2                | male-specific lethal 2 homolog (Drosophila); male-sp  | 2.3   |
| Gm14176             | predicted gene 14176                                  | 2.08  |
| Amd2; Amd1          | S-adenosylmethionine decarboxylase 2; S-adenosylme    | 2.43  |
| Vamp1               | vesicle-associated membrane protein 1                 | 2.08  |
| Arl6ip5             | ADP-ribosylation factor-like 6 interacting protein 5  | 2.08  |
| Rpl28-ps3           | ribosomal protein L28, pseudogene 3                   | 3.77  |
| Ifi27               | interferon, alpha-inducible protein 27                | 2.13  |
| Gm5514              | predicted gene 5514 [Source:MGI Symbol;Acc:MGI:       | 3.67  |
| Mir6412             | microRNA 6412                                         | 3.01  |
|                     |                                                       | 2.45  |
|                     |                                                       | -2.1  |
| Gm15665             | predicted gene 15665 [Source:MGI Symbol;Acc:MGI       | -5.62 |
| Ubc; Uba52          | ubiquitin C; ubiquitin A-52 residue ribosomal protein | 5.5   |
| Sec62               | SEC62 homolog (S. cerevisiae)                         | 2.07  |
| Gm14165             | predicted gene 14165 [Source:MGI Symbol;Acc:MGI       | 2.26  |
| Gm24588             | predicted gene, 24588 [Source:MGISymbol;Acc:MG        | 2.82  |
| Gm10221             | predicted gene 10221 [Source:MGI Symbol;Acc:MGI       | 3.34  |
| Cnot4               | CCR4-NOT transcription complex, subunit 4             | 2.21  |
| Pts                 | 6-pyruvoyl-tetrahydropterin synthase                  | 3.23  |
| LOC100862094        | PREDICTED: uncharacterized LOC100862094 (LOC          | 3.28  |
| Mir3097             | microRNA 3097                                         | 2.66  |
|                     |                                                       | 3.17  |
| Scarna3a; Mir1843b  | small Cajal body-specific RNA 3A; microRNA 1843b      | -2.7  |
|                     |                                                       | 3.43  |
|                     |                                                       | -2.28 |

|                     |                                                        |       |
|---------------------|--------------------------------------------------------|-------|
| Gm23448             | predicted gene, 23448 [Source:MGI Symbol;Acc:MGI]      | -2.23 |
|                     |                                                        | -2.1  |
| Rps2-ps13           | ribosomal protein S2, pseudogene 13                    | 4.21  |
| Gdi1                | guanosine diphosphate (GDP) dissociation inhibitor 1   | 3.45  |
| Gm25635             | predicted gene, 25635 [Source:MGI Symbol;Acc:MGI]      | 4.17  |
| Gm23510             | predicted gene, 23510 [Source:MGI Symbol;Acc:MGI]      | -3.07 |
| Gm6822              | predicted pseudogene 6822                              | 3.03  |
|                     |                                                        | -2.15 |
| Rpl19-ps12          | ribosomal protein L19, pseudogene 12                   | 3.27  |
| Actb                | actin, beta                                            | 2.62  |
| Gm16399             | predicted pseudogene 16399 [Source:MGI Symbol;Acc:MGI] | 2.89  |
|                     |                                                        | -2.26 |
| Ptgds               | prostaglandin D2 synthase (brain)                      | 2.15  |
| Rab7                | RAB7, member RAS oncogene family                       | 6.38  |
| Gm5436              | predicted pseudogene 5436 [Source:MGI Symbol;Acc:MGI]  | 2.22  |
| Tmem50a             | transmembrane protein 50A                              | 5.35  |
|                     |                                                        | 2.16  |
| LOC100861642        | PREDICTED: uncharacterized LOC100861642 (LOC100861642) | 4.22  |
| Gm5265              | predicted pseudogene 5265 [Source:MGI Symbol;Acc:MGI]  | 3.76  |
| Gm20432             | predicted gene 20432 [Source:MGI Symbol;Acc:MGI]       | 2     |
| Gm15961; RP23-455J6 | predicted gene 15961 [Source:MGI Symbol;Acc:MGI]       | 2.58  |
|                     |                                                        | -7.83 |
| Traj59              | T cell receptor alpha joining 59                       | -3.01 |
|                     |                                                        | -4.66 |
| Rbx1                | ring-box 1                                             | 2.89  |
| Gm17428             | predicted gene, 17428 [Source:MGI Symbol;Acc:MGI]      | -5.48 |
|                     |                                                        | 2.52  |
|                     |                                                        | -2.93 |
| Mir1912             | microRNA 1912                                          | 25.94 |
| Gm10181             | predicted gene 10181 [Source:MGI Symbol;Acc:MGI]       | -5.52 |
| Ppp2cb              | protein phosphatase 2 (formerly 2A), catalytic subunit | 2.72  |
| Ephx1               | epoxide hydrolase 1, microsomal                        | 2.17  |
|                     |                                                        | -2.63 |
| Wsb1                | WD repeat and SOCS box-containing 1                    | 2.48  |
|                     |                                                        | -2.89 |
| Gm16354             | predicted gene 16354 [Source:MGI Symbol;Acc:MGI]       | 3.24  |
|                     |                                                        | 5.16  |
|                     |                                                        | 2.48  |
|                     |                                                        | 2.57  |
| Gm8648              | predicted gene 8648 [Source:MGI Symbol;Acc:MGI]        | 5.06  |
| Cfdp1               | craniofacial development protein 1                     | 2.11  |
| Rpl3                | ribosomal protein L3                                   | 6.09  |
| Ube2nl              | ubiquitin-conjugating enzyme E2N-like [Source:MGI]     | 2.41  |
|                     |                                                        | -3.14 |

|                      |                                                     |        |
|----------------------|-----------------------------------------------------|--------|
|                      |                                                     | 2.71   |
|                      |                                                     | -4.46  |
| Gm14604; RP23-260P9. | predicted gene 14604; novel pseudogene              | -2.68  |
| Rpl8                 | ribosomal protein L8                                | 6.14   |
| Bcap31               | B cell receptor associated protein 31               | 2.32   |
|                      |                                                     | 2.62   |
| Cpt1a                | carnitine palmitoyltransferase 1a, liver            | 2.24   |
| Cds2                 | CDP-diacylglycerol synthase (phosphatidate cytidyl  | 2.07   |
|                      |                                                     | -2.1   |
| Mtmr6                | myotubularin related protein 6                      | 2.14   |
| Gm25188              | predicted gene, 25188 [Source:MGI Symbol;Acc:MGI    | 11.15  |
| Ubb; Gm1821          | ubiquitin B; ubiquitin pseudogene                   | 4.61   |
| Prdx4                | peroxiredoxin 4                                     | 2.9    |
| Tuba1a               | tubulin, alpha 1A                                   | 3.19   |
| Gm7363               | predicted gene 7363 [Source:MGI Symbol;Acc:MGI:     | 4.19   |
| Mir692-1             | microRNA 692-1                                      | 6.04   |
| Gm17604              | predicted gene, 17604 [Source:MGI Symbol;Acc:MGI    | -15.11 |
| Gm10224              | predicted pseudogene 10224                          | 2.88   |
| Gm4017; Gm10157      | predicted gene 4017 [Source:MGI Symbol;Acc:MGI:     | 8.36   |
| Akr1a1               | aldo-keto reductase family 1, member A1 (aldehyde r | 2.61   |
| Gm16470              | predicted pseudogene 16470 [Source:MGI Symbol;Ac    | 2.65   |
| Gm5777               | predicted gene 5777 [Source:MGI Symbol;Acc:MGI:     | 2.82   |
| Gm9166               | predicted gene 9166 [Source:MGI Symbol;Acc:MGI:     | 2.48   |
| Raph1                | Ras association (RalGDS/AF-6) and pleckstrin homol  | 2.24   |
|                      |                                                     | 2.57   |
| Gm1821               | predicted gene 1821 (Gm1821), non-coding RNA.; ub   | 13.6   |
| Arl5a                | ADP-ribosylation factor-like 5A                     | 2.16   |
|                      |                                                     | 2.48   |
| Cox4i1               | cytochrome c oxidase subunit IV isoform 1           | 2.2    |
| Fis1                 | fission 1 (mitochondrial outer membrane) homolog (y | 2.11   |
| Gm4479               | predicted gene 4479 [Source:MGI Symbol;Acc:MGI:     | 3.79   |
| Gm6293               | predicted pseudogene 6293                           | 3.27   |
| Gm5471               | predicted pseudogene 5471                           | 5.07   |
| Ndufb11              | NADH dehydrogenase (ubiquinone) 1 beta subcomple    | 5.18   |
| Tspan3               | tetraspanin 3                                       | 3.97   |
| Gm13249              | predicted gene 13249                                | 2.54   |
| Gm22043              | predicted gene, 22043 [Source:MGI Symbol;Acc:MGI    | -2.36  |
|                      |                                                     | 4.44   |
| Mir1960              | microRNA 1960                                       | -2.61  |
| Gm19774              | PREDICTED: predicted gene, 19774 (Gm19774), m       | 5.38   |
| Gm15013              | predicted gene 15013 [Source:MGI Symbol;Acc:MGI     | 3.32   |
|                      |                                                     | -5.96  |
| Gm27626              | predicted gene, 27626 [Source:MGI Symbol;Acc:MGI    | 10.89  |
| Mir6352              | microRNA 6352                                       | -3.3   |



|               |                                                                          |       |
|---------------|--------------------------------------------------------------------------|-------|
| Gm2531        | predicted gene 2531 [Source:MGI Symbol;Acc:MGI]                          | -3.78 |
| Gm25559       | predicted gene, 25559 [Source:MGI Symbol;Acc:MG]                         | -3.19 |
| 2410015M20Rik | RIKEN cDNA 2410015M20 gene                                               | 2.33  |
|               |                                                                          | 2.59  |
| Cops3         | COP9 (constitutive photomorphogenic) homolog, sub                        | 2.46  |
| Apod          | apolipoprotein D                                                         | 7.04  |
| Rpl10-ps6     | ribosomal protein L10, pseudogene 6                                      | 6.03  |
|               |                                                                          | -4.65 |
| Rbm4          | RNA binding motif protein 4                                              | 2.09  |
| Hspa4         | heat shock protein 4                                                     | 2.08  |
| Rpl32-ps      | ribosomal protein L32, pseudogene [Source:MGI Sym                        | 2.27  |
|               |                                                                          | -3.04 |
| Gm6428        | predicted pseudogene 6428 [Source:MGI Symbol;Acc                         | 3.71  |
| Gm27248       | predicted gene 27248 [Source:MGI Symbol;Acc:MGI]                         | 2.21  |
| Gm6374        | predicted gene 6374                                                      | 2.18  |
| LOC100862193  | PREDICTED: uncharacterized LOC100862193 (LOC                             | 2.26  |
| Ptprb         | protein tyrosine phosphatase, receptor type, B                           | 2.33  |
| Rgs7bp        | regulator of G-protein signalling 7 binding protein                      | 2.47  |
| Gm13680       | predicted gene 13680 [Source:MGI Symbol;Acc:MGI]                         | 11.94 |
| LOC100862107  | PREDICTED: uncharacterized LOC100862107 (LOC                             | 2.4   |
| Gm4987        | predicted gene 4987 [Source:MGI Symbol;Acc:MGI]                          | 2.01  |
| Gm12231       | predicted gene 12231                                                     | 7.02  |
| Atp1b1        | ATPase, Na <sup>+</sup> /K <sup>+</sup> transporting, beta 1 polypeptide | 3.3   |
|               |                                                                          | 2.91  |
| Tuba4a        | tubulin, alpha 4A                                                        | 2.76  |
| Vdac3         | voltage-dependent anion channel 3                                        | 8.21  |
| Canx          | calnexin                                                                 | 2.22  |
| Gm11628       | predicted gene 11628 [Source:MGI Symbol;Acc:MGI]                         | 2.62  |
| Prkag1        | protein kinase, AMP-activated, gamma 1 non-catalyti                      | 3.84  |
|               |                                                                          | 2.7   |
| Maf           | avian musculoaponeurotic fibrosarcoma (v-maf) AS4                        | 2.17  |
| Gm8508        | predicted gene 8508 [Source:MGI Symbol;Acc:MGI]                          | 3.07  |
| Gm14670       | predicted gene 14670 [Source:MGI Symbol;Acc:MGI]                         | -2.44 |
|               |                                                                          | -2.64 |
| Gm11539       | predicted gene 11539 [Source:MGI Symbol;Acc:MGI]                         | 3.02  |
| Grina         | glutamate receptor, ionotropic, N-methyl D-aspartate-                    | 5.12  |
| Gm3695        | predicted gene 3695 [Source:MGI Symbol;Acc:MGI]                          | 2.4   |
| Gm22501       | predicted gene, 22501 [Source:MGI Symbol;Acc:MG                          | 2.36  |
| Gm19491       | PREDICTED: predicted gene, 19491 (Gm19491), mi                           | 2.55  |
|               |                                                                          | 2.09  |
| Rpl9-ps1      | ribosomal protein L9, pseudogene 1                                       | 2.68  |
| Odc1          | ornithine decarboxylase, structural 1                                    | 4.17  |
|               |                                                                          | -2.73 |
| Rpl10-ps1     | ribosomal protein L10, pseudogene 1                                      | 6.3   |

|                     |                                                      |        |
|---------------------|------------------------------------------------------|--------|
| Gm13436             | predicted gene 13436                                 | 2.41   |
| Gm7502              | predicted gene 7502 [Source:MGI Symbol;Acc:MGI]      | 2.25   |
| Gm24983             | predicted gene, 24983 [Source:MGI Symbol;Acc:MGI]    | -3.41  |
|                     |                                                      | 3.6    |
| Gm12328             | predicted gene 12328 [Source:MGI Symbol;Acc:MGI]     | 6.46   |
|                     |                                                      | 2.1    |
|                     |                                                      | 2.1    |
| Gm22760; Gm12318    | predicted gene, 22760 [Source:MGI Symbol;Acc:MGI]    | 14.29  |
| Gm22358             | predicted gene, 22358 [Source:MGI Symbol;Acc:MGI]    | 7.39   |
| Epas1               | endothelial PAS domain protein 1                     | 3.75   |
|                     |                                                      | -4.53  |
| Der1l               | Der1-like domain family, member 1                    | 2.32   |
| Gm12726             | predicted gene 12726 [Source:MGI Symbol;Acc:MGI]     | 2.47   |
|                     |                                                      | 2.56   |
| Gm25594             | predicted gene, 25594 [Source:MGI Symbol;Acc:MGI]    | 6.76   |
| Rpl21-ps12          | ribosomal protein L21, pseudogene 12 [Source:MGI S]  | 3.07   |
|                     |                                                      | -2.63  |
| Hba-a2; Hba-a1      | hemoglobin alpha, adult chain 2; hemoglobin alpha, a | 2.56   |
| Gm4735              | predicted gene 4735                                  | 6.34   |
|                     |                                                      | -2.01  |
|                     |                                                      | -2.29  |
| Gm13413             | predicted gene 13413 [Source:MGI Symbol;Acc:MGI]     | 3.16   |
| Cox6b1              | cytochrome c oxidase, subunit VIb polypeptide 1      | 2.47   |
|                     |                                                      | 2.79   |
| Larp4               | La ribonucleoprotein domain family, member 4; La ri  | 3.56   |
| D8Ertd738e          | DNA segment, Chr 8, ERATO Doi 738, expressed         | 2.51   |
|                     |                                                      | 2.17   |
|                     |                                                      | -12.34 |
|                     |                                                      | -12.34 |
|                     |                                                      | -12.34 |
|                     |                                                      | -12.34 |
|                     |                                                      | -12.34 |
| Hsp90b1             | heat shock protein 90, beta (Grp94), member 1        | 3.4    |
| Sv2b                | synaptic vesicle glycoprotein 2 b                    | 2.3    |
| m14734; RP23-272G10 | predicted gene 14734; novel pseudogene               | -2.62  |
| Pcnp                | PEST proteolytic signal containing nuclear protein   | 2.92   |
|                     |                                                      | 2.08   |
| Arl6ip1             | ADP-ribosylation factor-like 6 interacting protein 1 | 5.76   |
|                     |                                                      | -3.03  |
|                     |                                                      | -2.01  |
| Ostc                | oligosaccharyltransferase complex subunit            | 4.77   |
| Gm5863              | predicted gene 5863 [Source:MGI Symbol;Acc:MGI]      | 2.17   |
| Ccng1               | cyclin G1                                            | 2.59   |
|                     |                                                      | 2.65   |

|                    |                                                             |       |
|--------------------|-------------------------------------------------------------|-------|
| Eif1-ps1           | eukaryotic translation initiation factor 1, pseudogene      | 6.36  |
|                    |                                                             | 2.72  |
| Hsbp1              | heat shock factor binding protein 1                         | 7.13  |
|                    |                                                             | -2.09 |
| Snord82            | small nucleolar RNA, C/D box 82                             | -5.52 |
| Gm13882            | predicted gene 13882 [Source:MGI Symbol;Acc:MGI]            | 2.16  |
| Gm12424            | predicted gene 12424 [Source:MGI Symbol;Acc:MGI]            | -2.7  |
|                    |                                                             | 2.94  |
| Ncam1              | neural cell adhesion molecule 1                             | 2.36  |
|                    |                                                             | -2.85 |
| Gm4883             | predicted gene 4883                                         | 3.73  |
|                    |                                                             | -4.1  |
| Elf1               | E74-like factor 1; E74-like factor 1 (Elf1), mRNA.          | 2.71  |
| Gm6969             | predicted pseudogene 6969 [Source:MGI Symbol;Acc:MGI]       | 3.22  |
|                    |                                                             | -2.71 |
| Atp6v0e            | ATPase, H <sup>+</sup> transporting, lysosomal V0 subunit E | 3.46  |
|                    |                                                             | -2.35 |
| Cdc42              | cell division cycle 42                                      | 2.84  |
| Gm6316; EG622339   | predicted pseudogene 6316 [Source:MGI Symbol;Acc:MGI]       | 2.05  |
| Gm13797            | predicted gene 13797 [Source:MGI Symbol;Acc:MGI]            | 12.42 |
| Dstn               | destrin                                                     | 3.17  |
| Pgm2l1             | phosphoglucomutase 2-like 1                                 | 2.18  |
| Slc9a9             | solute carrier family 9 (sodium/hydrogen exchanger),        | 2.46  |
| Mir8115            | microRNA 8115                                               | -5.46 |
|                    |                                                             | -3.48 |
| Pdhb               | pyruvate dehydrogenase (lipoamide) beta                     | 2.32  |
| Gm6768             | predicted gene 6768 [Source:MGI Symbol;Acc:MGI]             | 5.45  |
| Gm12666            | predicted gene 12666                                        | 2.88  |
| Gm20349            | PREDICTED: predicted gene, 20349 (Gm20349), mi              | 3.01  |
| Gm16412            | predicted pseudogene 16412 [Source:MGI Symbol;Acc:MGI]      | 2.88  |
| Ndufa12            | NADH dehydrogenase (ubiquinone) 1 alpha subcomp             | 2.18  |
| Abhd2              | abhydrolase domain containing 2                             | 2.13  |
| Trf                | transferrin                                                 | 2.06  |
| Gm12129            | predicted gene 12129 [Source:MGI Symbol;Acc:MGI]            | -2.51 |
| Lum                | lumican                                                     | 2.28  |
|                    |                                                             | 2.64  |
| LOC100861804       | PREDICTED: uncharacterized LOC100861804, trans              | 2.17  |
|                    |                                                             | 3.73  |
| Gm12922            | predicted gene 12922 [Source:MGI Symbol;Acc:MGI]            | 2.23  |
|                    |                                                             | -2.04 |
| Gm19976            | PREDICTED: predicted gene, 19976, transcript varia          | 2.18  |
| Rnaset2a; Rnaset2b | ribonuclease T2A; ribonuclease T2B (Rnaset2b), mR           | 3.68  |
| Rpl18-ps1          | ribosomal protein L18, pseudogene 1                         | 17.43 |
| Gm12944            | predicted gene 12944 [Source:MGI Symbol;Acc:MGI]            | 4.22  |

|                    |                                                       |       |
|--------------------|-------------------------------------------------------|-------|
|                    |                                                       | -2.91 |
|                    |                                                       | -2.01 |
|                    |                                                       | -2.01 |
|                    |                                                       | -2.01 |
| Gm16416            | predicted gene 16416 [Source:MGI Symbol;Acc:MGI]      | 4.56  |
|                    |                                                       | 6.76  |
| Dctn4              | dynactin 4                                            | 2.14  |
| Gm13226            | predicted gene 13226 [Source:MGI Symbol;Acc:MGI]      | 2.71  |
| Tecr               | trans-2,3-enoyl-CoA reductase                         | 2.59  |
| Gm2546             | predicted gene 2546 [Source:MGI Symbol;Acc:MGI]       | 3.31  |
| Gm5560             | predicted pseudogene 5560                             | 2.8   |
| Atxn10             | ataxin 10                                             | 2.33  |
|                    |                                                       | 7.48  |
|                    |                                                       | -2.13 |
| Vkorc1l1           | vitamin K epoxide reductase complex, subunit 1-like   | 2.47  |
| Gm5921             | predicted gene 5921 [Source:MGI Symbol;Acc:MGI]       | 2.67  |
| Mtch1              | mitochondrial carrier homolog 1 (C. elegans)          | 2.08  |
| Gm14284            | predicted gene 14284 [Source:MGI Symbol;Acc:MGI]      | 7.88  |
| Gkn3               | gastrokine 3                                          | 2.26  |
|                    |                                                       | -3.65 |
|                    |                                                       | -2.8  |
|                    |                                                       | 2.12  |
| Cep70              | centrosomal protein 70                                | -2.05 |
|                    |                                                       | -3.3  |
| Gm14148            | predicted gene 14148 [Source:MGI Symbol;Acc:MGI]      | 2.24  |
| Gm7887             | predicted gene 7887 [Source:MGI Symbol;Acc:MGI]       | 3.81  |
| Gm25660            | predicted gene, 25660 [Source:MGI Symbol;Acc:MGI]     | -2.63 |
| Gm17047            | predicted gene 17047 [Source:MGI Symbol;Acc:MGI]      | -2.19 |
| Uqcr11             | ubiquinol-cytochrome c reductase, complex III subunit | 2.04  |
|                    |                                                       | -8.75 |
| Gm14946            | predicted gene 14946 [Source:MGI Symbol;Acc:MGI]      | -2.19 |
| Uck2               | uridine-cytidine kinase 2                             | 4.28  |
| Rpl19-ps4; Gm27506 | ribosomal protein L19, pseudogene 4 [Source:MGI Sy    | 3.46  |
| Fads2              | fatty acid desaturase 2                               | 2.37  |
| Gm6829             | predicted pseudogene 6829 [Source:MGI Symbol;Acc:MGI] | 4.18  |
| Erh                | enhancer of rudimentary homolog (Drosophila)          | 2.89  |
| Igfbp7             | insulin-like growth factor binding protein 7          | 2.36  |
|                    |                                                       | 4.07  |
|                    |                                                       | 3.52  |
|                    |                                                       | -3.52 |
|                    |                                                       | 2.14  |
| Gm19933            | PREDICTED: predicted gene, 19933, transcript varia    | 3.43  |
| Dhx9               | DEAH (Asp-Glu-Ala-His) box polypeptide 9              | 2.15  |
| Smdt1              | single-pass membrane protein with aspartate rich tail | 4.44  |

|                  |                                                                     |        |
|------------------|---------------------------------------------------------------------|--------|
| Fabp7            | fatty acid binding protein 7, brain                                 | 4      |
| Gm22757; Gm13875 | predicted gene, 22757 [Source:MGI Symbol;Acc:MGI]                   | 6.55   |
| Gm25856          | predicted gene, 25856 [Source:MGI Symbol;Acc:MGI]                   | -10.37 |
| Gm5621           | predicted gene 5621                                                 | 2.39   |
|                  |                                                                     | -2.21  |
| Gm22663          | predicted gene, 22663 [Source:MGI Symbol;Acc:MGI]                   | -2.53  |
| Gm11969          | predicted gene 11969 [Source:MGI Symbol;Acc:MGI]                    | 2.56   |
| Gm8724           | predicted pseudogene 8724 [Source:MGI Symbol;Acc:MGI]               | 3.1    |
|                  |                                                                     | 2.28   |
| Gm8399; Gm25241  | predicted gene 8399 [Source:MGI Symbol;Acc:MGI]                     | 3.1    |
| Gm26300; Gm11285 | predicted gene, 26300 [Source:MGI Symbol;Acc:MGI]                   | 4.8    |
| Gapdh-ps14       | glyceraldehyde-3-phosphate dehydrogenase, pseudogene                | 2.25   |
| Gm22303          | predicted gene, 22303 [Source:MGI Symbol;Acc:MGI]                   | 3.64   |
|                  |                                                                     | 2.44   |
|                  |                                                                     | 3.21   |
| Gm5559           | predicted gene 5559                                                 | 2.01   |
|                  |                                                                     | -2.02  |
| Gm27684          | predicted gene, 27684 [Source:MGI Symbol;Acc:MGI]                   | 6.12   |
| Gm13433          | predicted gene 13433 [Source:MGI Symbol;Acc:MGI]                    | 5.56   |
|                  |                                                                     | 10.53  |
| Gm4575           | predicted gene 4575 [Source:MGI Symbol;Acc:MGI]                     | 2.56   |
| Atp5l-ps1        | ATP synthase, H <sup>+</sup> transporting, mitochondrial F0 complex | 6.14   |
|                  |                                                                     | -2.03  |
|                  |                                                                     | -2.07  |
| Gm10198          | predicted gene 10198 [Source:MGI Symbol;Acc:MGI]                    | -3.76  |
| Gm11185          | predicted gene 11185 [Source:MGI Symbol;Acc:MGI]                    | 2.18   |
|                  |                                                                     | 2.2    |
| Gm16418          | predicted pseudogene 16418 [Source:MGI Symbol;Acc:MGI]              | 2.66   |
|                  |                                                                     | 9.96   |
|                  |                                                                     | 2.54   |
|                  |                                                                     | 3.86   |
| Gm11172          | predicted gene 11172 [Source:MGI Symbol;Acc:MGI]                    | -3.63  |
| Gm5844           | predicted gene 5844 [Source:MGI Symbol;Acc:MGI]                     | 2.96   |
| Tdrd3            | tudor domain containing 3                                           | 2.11   |
| Rpl14-ps1        | ribosomal protein L14, pseudogene 1 [Source:MGI Symbol;Acc:MGI]     | 3.03   |
| Napb             | N-ethylmaleimide sensitive fusion protein attachment                | 2.57   |
|                  |                                                                     | 7.81   |
| Serinc1          | serine incorporator 1                                               | 5.7    |
| Gm10073          | predicted pseudogene 10073 [Source:MGI Symbol;Acc:MGI]              | 3.23   |

**Table S2. Top 30 transcription factors (TFs) differentially expressed by a high glycemic diet (HGD) with and without soluble epoxide hydrolase inhibitor (sEHI) in hippocampal microvascular endothelium.**

| HGD vs LGD |                                                          |         | HGD+sEHI vs HGD |                                                  |         |
|------------|----------------------------------------------------------|---------|-----------------|--------------------------------------------------|---------|
| Top 30 TFs | TF Name                                                  | P-value | Top 30 TFs      | TF Name                                          | P-value |
| MEF2A      | Myocyte Enhancer Factor 2A                               | 1.2E-25 | MEF2D           | Myocyte Enhancer Factor 2D                       | 5.7E-24 |
| MEF2D      | Myocyte Enhancer Factor 2D                               | 1.9E-25 | MECP2           | Methyl-CpG Binding Protein 2                     | 3.1E-23 |
| MECP2      | Methyl-CpG Binding Protein 2                             | 2.6E-22 | MEF2A           | Myocyte Enhancer Factor 2A                       | 4.5E-22 |
| CDX2       | Caudal-type homeobox 2                                   | 5.2E-19 | GATA3           | GATA Binding Protein 3                           | 2.4E-19 |
| GATA3      | GATA Binding Protein 3                                   | 8.1E-19 | CDX2            | Caudal Type Homeobox 2                           | 1.0E-18 |
| NCOA2      | Nuclear Receptor Coactivator 2                           | 2.0E-16 | TCF4            | Transcription Factor 4                           | 1.9E-17 |
| PPARA      | Peroxisome Proliferator Activated Receptor Alpha         | 1.4E-15 | NEUROG3         | Neurogenin 3                                     | 3.7E-17 |
| ESRRG      | Estrogen Related Receptor Gamma                          | 3.8E-15 | E2F4            | E2F Transcription Factor 4                       | 1.1E-16 |
| SETDB1     | SET Domain Bifurcated Histone Lysine Methyltransferase 1 | 1.6E-14 | ZBTB20          | Zinc Finger And BTB Domain Containing 20         | 3.6E-16 |
| BHLHA15    | Basic Helix-Loop-Helix Family Member A15                 | 2.3E-14 | FOXO1           | Forkhead Box O1                                  | 1.6E-15 |
| STAT3      | Signal Transducer And Activator Of Transcription 3       | 3.0E-14 | KLF9            | Kruppel Like Factor 9                            | 2.2E-15 |
| BATF       | Basic Leucine Zipper ATF-Like Transcription Factor       | 6.3E-14 | PPARA           | Peroxisome Proliferator Activated Receptor Alpha | 9.5E-15 |
| SOX10      | SRY-Box Transcription Factor 10                          | 7.1E-14 | HIF1A           | Hypoxia Inducible Factor 1 Subunit Alpha         | 3.2E-14 |
| MYC        | MYC Proto-Oncogene, BHLH Transcription Factor            | 1.7E-13 | BHLHA15         | Basic Helix-Loop-Helix Family Member A15         | 4.9E-14 |
| DNMT1      | DNA Methyltransferase 1                                  | 2.1E-13 | VDR             | Vitamin D Receptor                               | 1.1E-13 |
| ESR1       | Estrogen Receptor 1                                      | 2.2E-13 | ESR1            | Estrogen Receptor 1                              | 1.5E-13 |
| NEUROG3    | Neurogenin 3                                             | 3.1E-13 | MYC             | MYC Proto-Oncogene, BHLH Transcription Factor    | 2.2E-13 |
| EBF1       | EBF Transcription Factor 1                               | 3.3E-13 | DOT1L           | DOT1 Like Histone                                | 2.3E-13 |

|        |                                                                   |         |         |                                                    |         |
|--------|-------------------------------------------------------------------|---------|---------|----------------------------------------------------|---------|
|        |                                                                   |         |         | Lysine Methyltransferase                           |         |
| E2F4   | E2F Transcription Factor 4                                        | 4.5E-13 | KLF15   | Kruppel Like Factor 15                             | 1.6E-12 |
| HEY2   | Hes Related Family BHLH Transcription Factor With YRPW Motif 2    | 4.5E-13 | RUNX1   | RUNX Family Transcription Factor 1                 | 1.8E-12 |
| FOXP3  | Forkhead Box P3                                                   | 5.2E-13 | NCOA2   | Nuclear Receptor Coactivator 2                     | 1.9E-12 |
| TAL1   | TAL BHLH Transcription Factor 1, Erythroid Differentiation Factor | 5.5E-13 | SOX10   | SRY-Box Transcription Factor 10                    | 2.2E-12 |
| PRDM16 | PR/SET Domain 16                                                  | 5.5E-13 | HIVEP2  | HIVEP Zinc Finger 2                                | 3.4E-12 |
| ESRRA  | Estrogen Related Receptor Alpha                                   | 7.4E-13 | STAT3   | Signal Transducer And Activator Of Transcription 3 | 7.8E-12 |
| FOXO1  | Forkhead Box O1                                                   | 8.1E-13 | ONECUT2 | One Cut Homeobox 2                                 | 8.4E-12 |
| XBP1   | X-Box Binding Protein 1                                           | 8.6E-13 | MEF2D   | Myocyte Enhancer Factor 2D                         | 1.6E-11 |
| DOT1L  | DOT1 Like Histone Lysine Methyltransferase                        | 8.8E-13 | ATF6    | Activating Transcription Factor 6                  | 2.2E-11 |
| STAT1  | Signal Transducer And Activator Of Transcription 1                | 1.1E-12 | DMRT1   | Doublesex And Mab-3 Related Transcription Factor 1 | 2.4E-11 |
| KLF9   | Kruppel Like Factor 9                                             | 1.4E-12 | STAT3   | Signal Transducer And Activator Of Transcription 3 | 3.0E-11 |
| NRF1   | Nuclear Respiratory Factor 1                                      | 2.3E-12 | AIRE    | Autoimmune Regulator                               | 3.3E-11 |

**Table S3. Effect of the high glycemic diet (HGD) with and without soluble epoxide hydrolase inhibitor (sEHI) on the expression of microRNAs (miRNAs) in hippocampal microvessels.**

| HGD vs LGD  |             | HGD+sEHI vs HGD |             |             |             |             |             |
|-------------|-------------|-----------------|-------------|-------------|-------------|-------------|-------------|
| Gene Symbol | Fold Change | Gene Symbol     | Fold Change | Gene Symbol | Fold Change | Gene Symbol | Fold Change |
| Mir1912     | 25.94       | Gm25911         | -472.71     | Gm23019     | -10.24      | Mir669b     | -4.63       |
| Mir1960     | -2.61       | Gm24245         | -295.98     | Gm23415     | -4.54       | Mir669e     | -14.98      |
| Mir3097     | 2.66        | Gm24270         | -295.98     | Mir6917     | 2.32        | Mir684-1    | -172.48     |
| Mir5099     | -2.11       | Gm25732         | -6.68       | Gm23882     | -7.85       | Mir684-1    | -157.28     |
| Mir5125     | -3.25       | Gm24187         | -361.17     | Mir7667     | 2.29        | Mir684-1    | -157.28     |
| Mir6352     | -3.3        | Gm23388         | -64.54      | Gm23086     | -3.3        | Mir684-1    | -157.28     |
| Mir6412     | 3.01        | Mir669b         | -3.15       | Gm22610     | -23.14      | Mir684-1    | -157.28     |
| Mir692-1    | 6.04        | Mir6338         | 2.47        | Gm27530     | 2.1         | Mir684-1    | -157.28     |
| Mir6928     | -2.29       | Gm27626         | -52.49      | Gm24369     | -2.61       | Mir684-1    | -23.22      |
| Mir7053     | -2.31       | Mir6412         | -4.87       | Gm25063     | -12.6       | Mir684-1    | -12.92      |
| Mir8095     | -3.67       | Gm22735         | -3.52       | Gm25000     | -12.27      | Mir684-2    | -122.24     |
| Mir8115     | -5.46       | Gm22930         | -2.81       | Gm26050     | -3.82       | Mir692-2    | -9.57       |
| Gm22930     | 2.61        | Gm22694         | -2.51       | Gm22232     | -3.3        | Mir6935     | -4.69       |
| Gm24588     | 2.82        | Gm24093         | -2.56       | Gm25040     | -8.71       | Mir6903     | -3.03       |
| Gm24590     | 2.59        | Gm24811         | -6.44       | Gm22243     | -3.27       | Mir7090     | -2.54       |
| Gm25559     | -3.19       | Mir692-1        | -12.13      | Mir466f-4   | -8.96       | Mir5131     | -2.05       |
| Gm25594     | 6.76        | Gm23053         | -4.23       | Gm23368     | -5.59       | Mir1902     | -2.02       |
| Gm25732     | 2.01        | Gm22800         | -3.08       | Gm24026     | -5.18       | Mir761      | -2.76       |
| Gm27313     | -2.01       | Gm23566         | -7.29       | Mir1191     | -28.06      | Mir686      | -11.16      |
| Gm27626     | 10.89       | Gm23051         | -3.34       | Gm27722     | 4.66        | Mir3069     | -2.33       |
| Mir6903     | 2.15        | Gm23190         | -8.94       | Mir6989     | -19.52      | Mir5114     | -5.72       |
| Mir1902     | 2.11        | Mir669c         | 2.7         | Gm25738     | -4.36       | Mir1291     | -9.51       |
| Mir5125     | -5.81       | Gm23489         | -3.41       | Gm26308     | 2.42        | Gm23992     | -3.49       |
| Mir1843b    | -2.7        | Gm23154         | -20.66      | Gm26250     | -2.24       | Mir6388     | 2.19        |
| Mir5114     | 4.34        | Mir7033         | 2.07        | Gm22201     | 2.12        | Gm27989     | -4.61       |
|             |             | Mir3092         | 3           | Gm25693     | -3.26       | Mir193b     | 2.04        |
|             |             | Mir669m-2       | -3.26       | Gm26053     | -18.06      | Mir153      | 3.46        |
|             |             | Mir1951         | 2.21        | Gm23045     | -3.02       | Gm23164     | -2.28       |
|             |             | Gm27529         | -33.75      | Gm23728     | -13.47      | Gm27910     | -6.87       |
|             |             | Gm22030         | -5.74       | Gm27684     | -14.95      | Gm23189     | -2.15       |



|  |            |        |            |        |         |        |
|--|------------|--------|------------|--------|---------|--------|
|  | Gm27459    | -6.46  | Gm27935    | -5.91  | Gm25708 | -2.15  |
|  | Mir1195    | -3.59  | Gm26469    | -6.14  | Gm25959 | -2.15  |
|  | Gm23487    | -4.05  | Mir7053    | 2.07   | Gm24332 | -2.15  |
|  | Gm24588    | -2.83  | Gm25591    | -2.83  | Gm23802 | -2.15  |
|  | Gm25233    | -2.18  | Gm24710    | -3.38  | Gm22903 | -2.15  |
|  | Gm25355    | -2.25  | Gm24135    | -3.38  | Gm25571 | -2.15  |
|  | Gm23064    | -2.25  | Gm24586    | -4.47  | Gm23049 | -2.15  |
|  | Gm23631    | -3.23  | Gm23798    | -2.15  | Gm24370 | -2.15  |
|  | Gm25986    | -2.06  | Gm25070    | -2.15  | Gm24159 | -2.15  |
|  | Mir297-1   | -14.89 | Gm22475    | -2.15  | Gm25299 | -2.15  |
|  | Gm22852    | -2.47  | Gm23400    | -2.15  | Gm28019 | -2.72  |
|  | Gm23876    | -3.41  | Mir7063    | 2.99   | Gm22189 | -2.63  |
|  | Gm22117    | -2.51  | Mir6916    | 2.06   | Gm27839 | -6.54  |
|  | Gm27731    | -2.92  | Gm24541    | 2.59   | Mir6386 | 2.57   |
|  | Gm23785    | -2.08  | Mir1912    | -23.61 | Gm22230 | -2.08  |
|  | Mirlet7a-2 | 2.76   | Mir142     | 2.52   | Gm24111 | 2.01   |
|  | Gm22802    | -3.16  | Mir28c     | 4.3    | Gm23374 | -16.71 |
|  | Mir3475    | 3.04   | Mir297a-2  | -12.2  |         |        |
|  | Mir466j    | -3.66  | Mir467c    | -2.87  |         |        |
|  | Gm22712    | -8.71  | Mir5115    | -5.97  |         |        |
|  | Mir6993    | 2.35   | Gm23700    | -2.03  |         |        |
|  | Gm26231    | -4.45  | Mir669a-4  | -2.09  |         |        |
|  | Gm22234    | -4.45  | Mir669a-5  | -2.09  |         |        |
|  | Gm27450    | -2.31  | Mir669a-6  | -2.09  |         |        |
|  | Gm23880    | 2.32   | Mir669a-7  | -2.09  |         |        |
|  | Gm27704    | -11.55 | Mir669a-8  | -2.09  |         |        |
|  | Gm22990    | -2.76  | Mir669a-9  | -2.09  |         |        |
|  | Gm23215    | -2.21  | Mir669a-10 | -2.09  |         |        |
|  | Mir181d    | 2.83   | Mir669a-11 | -2.09  |         |        |
|  | Gm26463    | -2.72  | Mir669a-12 | -2.09  |         |        |
|  | Gm24975    | -2.72  | Gm27341    | -4.43  |         |        |
|  | Gm25100    | -2.72  | Gm23989    | -2.96  |         |        |

**Table S4. Effect of the high glycemic diet (HGD) with and without soluble epoxide hydrolase inhibitor (sEHI) on the expression of long non-coding RNAs (lncRNAs) in hippocampal microvessels.**

| HGD vs LGD           |             | HGD+sEHI vs HGD       |             |                       |             |              |             |
|----------------------|-------------|-----------------------|-------------|-----------------------|-------------|--------------|-------------|
| Gene Symbol          | Fold Change | Gene Symbol           | Fold Change | Gene Symbol           | Fold Change | Gene Symbol  | Fold Change |
| Gm6117; RP23-192D5.2 | -2.02       | 1110032A03Rik         | -2.07       | Gm24139               | -2          | LOC100862193 | -2.7        |
| Gm19738              | 3.65        | 1700020I14Rik         | -2.43       | Gm25722               | 2.18        | LOC100862198 | -2.02       |
| Gm19767              | 2.69        | 1700055C04Rik         | 2.01        | Gm26414               | 2.17        | LOC100862216 | -8          |
| Gm23098              | -16.65      | 4632427E13Rik         | -2.41       | Gm26581; RP23-58L22.8 | 2.19        | LOC100862227 | -4.74       |
| LOC100861862         | 3.16        | A130040M12Rik         | -2.5        | Gm26818               | -3.34       | LOC100862246 | -4.48       |
| LOC100861832         | 2.77        | DLG2-AS1_2            | 2.41        | Gm26826               | 2.28        | LOC100862257 | -3.9        |
| LOC100503279         | 2.94        | Gm11008; RP23-83O23.1 | -5.89       | Gm26904               | -3.87       | LOC100862313 | -7.1        |
| Gm19974              | 2.81        | Gm12159               | 2.36        | Gm26905               | -6.93       | LOC100862318 | -3.27       |
| Gm1974               | 2.03        | Gm14330; AC124590.1   | 2.06        | Gm9753                | 2.43        | LOC100862384 | -3.6        |
| LOC100861650         | 3.47        | Gm15961; RP23-455J6.4 | -2.56       | Gm9794                | -9.05       | Mir28c       | 4.3         |
| LOC100862246         | 3.73        | Gm19295               | -5.86       | LOC100503279          | -5.4        | Mir5115      | -5.97       |
| Peg3os               | 2.02        | Gm19425               | -6.31       | LOC100861642          | -7.61       | Peg3os       | -2.28       |
| LOC100862216         | 2.63        | Gm19453               | -8.51       | LOC100861650          | -3.7        | PRINS        | 2.23        |
| LOC100862063         | 2.23        | Gm19474               | -3.56       | LOC100861675          | -2.37       | Rmst         | -2.13       |

|                               |       |                               |        |                  |        |               |        |
|-------------------------------|-------|-------------------------------|--------|------------------|--------|---------------|--------|
| LOC100862<br>384              | 2.52  | Gm19491                       | -4.3   | LOC1008617<br>24 | 2.59   | Rny3          | -65.75 |
| Gm19496                       | 5.34  | Gm19494                       | -11.17 | LOC1008617<br>62 | -2.26  | Rpl14-<br>ps1 | -3.81  |
| Gm14209;<br>RP23-<br>464H11.2 | -2.23 | Gm19496                       | -6.31  | LOC1008618<br>04 | -2.44  |               |        |
| Gm19494                       | 5.09  | Gm19595                       | -31.12 | LOC1008618<br>05 | -2.58  |               |        |
| LOC100861<br>805              | 2.4   | Gm19660                       | -4.58  | LOC1008618<br>32 | -2.64  |               |        |
| Gm16339;<br>RP24-<br>369B4.1  | -2.49 | Gm19738                       | -8.16  | LOC1008618<br>33 | -6.59  |               |        |
| Rmst                          | 2.24  | Gm19767                       | -3.32  | LOC1008618<br>52 | -2.57  |               |        |
| LOC100862<br>313              | 2.43  | Gm19831                       | -31.16 | LOC1008618<br>62 | -3.04  |               |        |
| LOC100862<br>094              | 3.28  | Gm19868                       | -11.73 | LOC1008618<br>82 | -11.19 |               |        |
| LOC100861<br>642              | 4.22  | Gm19886                       | -2.96  | LOC1008619<br>39 | -2.33  |               |        |
| Gm15961;<br>RP23-<br>455J6.4  | 2.58  | Gm19933                       | -4.2   | LOC1008619<br>67 | -2.07  |               |        |
| LOC100862<br>193              | 2.26  | Gm19974                       | -2.38  | LOC1008620<br>63 | -2.91  |               |        |
| LOC100862<br>107              | 2.4   | Gm19976                       | -5.24  | LOC1008620<br>73 | -2.12  |               |        |
| Gm19491                       | 2.55  | Gm20077                       | -6.79  | LOC1008620<br>81 | -3.14  |               |        |
| Gm20349                       | 3.01  | Gm20265                       | 2.22   | LOC1008620<br>86 | -12.89 |               |        |
| LOC100861<br>804              | 2.17  | Gm20417;<br>RP24-<br>458F14.3 | -4.91  | LOC1008620<br>94 | -7.85  |               |        |
| Gm19976                       | 2.18  | Gm22701                       | -2.14  | LOC1008621<br>07 | -2.04  |               |        |
| Gm19933                       | 3.43  | Gm23221                       | 2.13   | LOC1008621<br>45 | -2.22  |               |        |

**Table S5. Effect of the high glycemic diet (HGD) with and without soluble epoxide hydrolase inhibitor (sEHI) on the expression of small nucleolar RNAs (snoRNAs) in hippocampal microvessels.**

| HGD vs LGD  |             | HGD+sEHI vs HGD |             |             |             |             |             |
|-------------|-------------|-----------------|-------------|-------------|-------------|-------------|-------------|
| Gene Symbol | Fold Change | Gene Symbol     | Fold Change | Gene Symbol | Fold Change | Gene Symbol | Fold Change |
| Gm22043     | -2.36       | Snord11611      | -27.05      | Gm25428     | 2.36        | Gm24658     | -22.19      |
| Gm22289     | 11.37       | Snora34         | -9.51       | Gm25128     | -5.89       | Gm23359     | -22.19      |
| Gm22303     | 3.64        | Snord11612      | -27.05      | Snord14e    | -17.03      | Gm24742     | -22.19      |
| Gm22358     | 7.39        | Gm24400         | -17.8       | Gm22631     | -31.72      | Gm23696     | -22.19      |
| Gm22501     | 2.36        | Gm22289         | -36.67      | Gm24233     | 2.31        | Gm26094     | -22.19      |
| Gm22663     | -2.53       | Gm24921         | 2.52        | Gm23089     | -28.78      | Gm23511     | -4.04       |
| Gm23448     | -2.23       | Gm24336         | -2.94       | Gm24711     | -28.78      | Gm23141     | -3.13       |
| Gm23510     | -3.07       | Gm22748         | -4.35       | Gm26188     | -28.78      | Gm23119     | -5.54       |
| Gm24400     | 19.44       | Snord16a        | -3.55       | Gm25839     | 2.77        | Gm25074     | -22.79      |
| Gm24621     | -2.3        | Gm25138         | -2.03       | Gm22173     | -32.86      | Gm23308     | 2.47        |
| Gm24783     | -2.5        | Gm22584         | -20.81      | Gm24691     | 2.05        | Snord11611  | -27.05      |
| Gm24983     | -3.41       | Gm24913         | 2.6         | Gm26502     | -36.66      | Snord11612  | -27.05      |
| Gm25153     | -2.23       | Gm26365         | -3.59       | Gm23313     | -36.66      | Snord116    | -27.05      |
| Gm25188     | 11.15       | Gm23862         | -21.04      | Gm23446     | -36.66      | Snord11611  | -27.05      |
| Gm25581     | -2.59       | Gm24518         | -8.64       | Gm25407     | 2.14        | Snord11612  | -27.05      |
| Gm25635     | 4.17        | Gm24079         | 2.2         | Gm22358     | -9.84       | Snord116    | -27.05      |
| Gm25856     | -10.37      | Gm23407         | 2.14        | Gm26032     | -21.9       | Snord11611  | -27.05      |
| Gm26361     | -2.07       | Gm24264         | -16.79      | Gm22046     | -21.9       | Snord11612  | -27.05      |
| Snord14e    | 16.58       | Gm22131         | -13.3       | Gm25471     | -21.9       | Snora34     | -9.51       |
| Snord16a    | 4.28        | Gm25157         | -16.4       | Gm25210     | -21.9       | Snord11611  | -27.05      |
| Snord82     | -5.52       | Gm22941         | -16.4       | Gm25350     | -22.19      | Scarna13    | -2.33       |
|             |             | Gm22258         | -16.4       | Gm22128     | -22.19      | Gm25474     | -7.06       |
|             |             | Gm22851         | -25.95      | Gm26246     | -22.19      | Gm22047     | -7.06       |
|             |             | Gm23953         | -7.43       | Gm25597     | -22.19      | Gm23619     | -7.06       |
|             |             | Gm26332         | -7.43       | Gm26201     | -22.19      | Snora30     | -6.12       |
|             |             | Gm22863         | -7.43       | Gm22812     | -22.19      | Gm22188     | -20.29      |
|             |             | Gm24618         | -7.43       | Gm26433     | -22.19      | Gm25188     | -12.16      |
|             |             | Gm22786         | 2.88        | Gm23357     | -22.19      | Gm26097     | -4.78       |
|             |             | Gm25944         | -6.97       | Gm22110     | -22.19      | Gm26411     | 2.03        |
|             |             | Gm25615         | -9.56       | Gm23724     | -22.19      | Scarna9     | -2.93       |
|             |             | Snord82         | 5.59        | Gm23549     | -22.19      | Gm23260     | 2.41        |
|             |             | Gm24729         | 2.27        | Gm26223     | -22.19      | Gm25635     | -3.88       |
|             |             | Gm23767         | -16.71      | Gm23524     | -22.19      | Gm23458     | -3.79       |
|             |             | Gm24298         | -2.26       | Gm26136     | -22.19      | Gm23322     | 2.64        |
|             |             | Gm22776         | -12.48      | Snord92     | -2.65       | Gm24463     | -5.25       |
|             |             | Gm24008         | 2.11        | Gm22297     | 2.89        | Gm23316     | 2.21        |
|             |             | Gm25506         | -2.81       | Gm22868     | 2.18        | Gm26170     | 2.24        |

|  |          |       |         |        |         |       |
|--|----------|-------|---------|--------|---------|-------|
|  | Gm22510  | -3.06 | Gm22303 | -3.94  | Gm24926 | -2.94 |
|  | Gm26390  | -3.06 | Gm23622 | 2.23   | Gm22632 | -2.94 |
|  | Gm26336  | -3.06 | Gm22501 | -2.39  | Gm22252 | -2.05 |
|  | Snord42a | -7.19 | Gm26202 | -10.66 | Snord17 | -2.02 |
|  | Gm25759  | -2.59 | Gm26358 | 2.54   |         |       |
|  | Gm24689  | 2.02  | Gm25224 | 3.56   |         |       |

**Table S6: Differentially expressed genes for the high glycemic diet (HGD) with soluble epoxide hydrolase inhibitor (sEHI) compared to without sEHI.**

| Gene Symbol     | Description                                                                                                                                                                    | Fold Change |
|-----------------|--------------------------------------------------------------------------------------------------------------------------------------------------------------------------------|-------------|
| Gm25911         | predicted gene, 25911 [Source:MGI Symbol;Acc:MGI:                                                                                                                              | -472.71     |
| Pcyox1          | prenylcysteine oxidase 1                                                                                                                                                       | -2.27       |
| Gm24245         | predicted gene, 24245 [Source:MGI Symbol;Acc:MGI:                                                                                                                              | -295.98     |
| Gm24270         | predicted gene, 24270 [Source:MGI Symbol;Acc:MGI:                                                                                                                              | -295.98     |
| Gm19738         | PREDICTED: predicted gene, 19738, transcript varian                                                                                                                            | -8.16       |
| Gm25732         | predicted gene, 25732 [Source:MGI Symbol;Acc:MGI:                                                                                                                              | -6.68       |
| Myl9            | myosin, light polypeptide 9, regulatory                                                                                                                                        | -2.33       |
| Gm24187         | predicted gene, 24187 [Source:MGI Symbol;Acc:MGI:                                                                                                                              | -361.17     |
|                 |                                                                                                                                                                                | 2.12        |
|                 |                                                                                                                                                                                | -3.03       |
| Copb2           | coatomer protein complex, subunit beta 2 (beta prime)                                                                                                                          | -2.17       |
| Gm19886         | PREDICTED: predicted gene, 19886 (Gm19886), mis                                                                                                                                | -2.96       |
| Gm23388         | predicted gene, 23388 [Source:MGI Symbol;Acc:MGI:                                                                                                                              | -64.54      |
| LOC100862148    | PREDICTED: uncharacterized LOC100862148 (LOC                                                                                                                                   | 2.18        |
| Cox5b           | cytochrome c oxidase subunit Vb                                                                                                                                                | -8.17       |
| Gm19767         | PREDICTED: predicted gene, 19767 (Gm19767), mis                                                                                                                                | -3.32       |
| Gm3608          | predicted gene 3608 [Source:MGISymbol;Acc:MGI:38                                                                                                                               | -4.8        |
| LOC100862216    | PREDICTED: uncharacterized LOC100862216, transcript variant 1 (LOC100862216), miscRNA.; PREDICTED: uncharacterized LOC100862216, transcript variant 2 (LOC100862216), miscRNA. | -8          |
| Atp2b4; Mir6903 | ATPase, Ca <sup>++</sup> transporting, plasma membrane 4; micr                                                                                                                 | -3.03       |
| 1700020I14Rik   | RIKEN cDNA 1700020I14 gene                                                                                                                                                     | -2.43       |
| Mir669b         | microRNA 669b                                                                                                                                                                  | -3.15       |
| Nfe2l1          | nuclear factor, erythroid derived 2,-like 1                                                                                                                                    | -2.85       |
| Apoa1bp         | apolipoprotein A-I binding protein                                                                                                                                             | -5.11       |
| Gm7381          | predicted gene 7381 [Source:MGISymbol;Acc:MGI:36                                                                                                                               | -10.83      |
| Rab24           | RAB24, member RAS oncogene family                                                                                                                                              | -4.27       |
| Gm14870         | predicted gene 14870 [Source:MGISymbol;Acc:MGI:3                                                                                                                               | -3.55       |
| Dnajc4          | DnaJ (Hsp40) homolog, subfamily C, member 4                                                                                                                                    | -2.26       |
|                 |                                                                                                                                                                                | 2.58        |
| Rplp0           | ribosomal protein, large, P0                                                                                                                                                   | -2.55       |
| Gm24400         | predicted gene, 24400 [Source:MGI Symbol;Acc:MGI:                                                                                                                              | -17.8       |
| Cox6a1          | cytochrome c oxidase subunit VIa polypeptide 1                                                                                                                                 | -5.72       |
| Gm11400         | predicted gene 11400 [Source:MGISymbol;Acc:MGI:3                                                                                                                               | -2.02       |
| Gm22289         | predicted gene, 22289 [Source:MGI Symbol;Acc:MGI:                                                                                                                              | -36.67      |
| Gm9103          | predicted gene 9103 [Source:MGISymbol;Acc:MGI:36                                                                                                                               | -2.07       |
| Dynlrb1         | dynein light chain roadblock-type 1                                                                                                                                            | -4.25       |
| AY036118        | cDNA sequence AY036118                                                                                                                                                         | -3.33       |
| Gm7497          | predicted gene 7497 [Source:MGISymbol;Acc:MGI:36                                                                                                                               | -3.93       |
|                 |                                                                                                                                                                                | -7.87       |

|                |                                                                                                                                                                                                                                                                               |        |
|----------------|-------------------------------------------------------------------------------------------------------------------------------------------------------------------------------------------------------------------------------------------------------------------------------|--------|
| Capza1         | capping protein (actin filament) muscle Z-line, alpha 1                                                                                                                                                                                                                       | -2.59  |
| Mir6338        | microRNA 6338                                                                                                                                                                                                                                                                 | 2.47   |
| Gm14450        | predicted gene 14450 [Source:MGISymbol;Acc:MGI:3                                                                                                                                                                                                                              | -2.01  |
| Ndufa9         | NADH dehydrogenase (ubiquinone) 1 alpha subcomple                                                                                                                                                                                                                             | -3.22  |
| Eif2b5         | eukaryotic translation initiation factor 2B, subunit 5 eps                                                                                                                                                                                                                    | -2.05  |
|                |                                                                                                                                                                                                                                                                               | -2.87  |
| Myh11          | myosin, heavy polypeptide 11, smooth muscle                                                                                                                                                                                                                                   | -2.17  |
| LOC100862313   | PREDICTED: uncharacterized LOC100862313,<br>transcript variant 1 (LOC100862313), miscRNA.;<br>PREDICTED: uncharacterized LOC100862313,<br>transcript variant 2 (LOC100862313), miscRNA.                                                                                       | -7.1   |
|                |                                                                                                                                                                                                                                                                               | 2.97   |
| Zfand3         | zinc finger, AN1-type domain 3                                                                                                                                                                                                                                                | -2.15  |
| Ezh1           | enhancer of zeste 1 polycomb repressive complex 2 sub                                                                                                                                                                                                                         | -2.27  |
|                |                                                                                                                                                                                                                                                                               | -4.16  |
| LOC100862384   | PREDICTED: uncharacterized LOC100862384 (LOC                                                                                                                                                                                                                                  | -3.6   |
| Gm14418        | predicted gene 14418 [Source:MGISymbol;Acc:MGI:3                                                                                                                                                                                                                              | -3.64  |
| Gm12074        | predicted gene 12074 [Source:MGISymbol;Acc:MGI:3                                                                                                                                                                                                                              | -3.8   |
|                |                                                                                                                                                                                                                                                                               | -2.9   |
| Brms11         | breast cancer metastasis-suppressor 1-like                                                                                                                                                                                                                                    | -2.48  |
|                |                                                                                                                                                                                                                                                                               | 2.33   |
| Puf60          | poly-U binding splicing factor 60                                                                                                                                                                                                                                             | -2.23  |
| Gm6054         | predicted gene 6054 [Source:MGISymbol;Acc:MGI:36                                                                                                                                                                                                                              | -3.07  |
| Gm13050        | predicted gene 13050 [Source:MGISymbol;Acc:MGI:3                                                                                                                                                                                                                              | -2.34  |
| Eif3s6-ps1     | eukaryotic translation initiation factor 3, subunit 6, pse                                                                                                                                                                                                                    | -11.05 |
| Psmc1          | protease (prosome, macropain) 26S subunit, ATPase 1;                                                                                                                                                                                                                          | -3.93  |
| Gm11675        | predicted gene 11675 [Source:MGISymbol;Acc:MGI:3                                                                                                                                                                                                                              | -4.8   |
| Apod           | apolipoprotein D                                                                                                                                                                                                                                                              | -41.9  |
|                |                                                                                                                                                                                                                                                                               | -2.31  |
| Gm11273        | predicted gene 11273                                                                                                                                                                                                                                                          | -8.22  |
| Psmc5          | protease (prosome, macropain) 26S subunit, ATPase 5                                                                                                                                                                                                                           | -3.59  |
|                |                                                                                                                                                                                                                                                                               | -3.03  |
| LOC100861762   | PREDICTED: uncharacterized LOC100861762 (LOC                                                                                                                                                                                                                                  | -2.26  |
| Gm9625         | predicted gene 9625 [Source:MGISymbol;Acc:MGI:37                                                                                                                                                                                                                              | -3.32  |
| Ndufv3         | NADH dehydrogenase (ubiquinone) flavoprotein 3                                                                                                                                                                                                                                | -2.27  |
| Trf            | transferrin                                                                                                                                                                                                                                                                   | -3.72  |
|                |                                                                                                                                                                                                                                                                               | -4.41  |
| Gm5967         | predicted gene 5967 [Source:MGISymbol;Acc:MGI:36                                                                                                                                                                                                                              | -2.2   |
| Hba-a2; Hba-a1 | hemoglobin alpha, adult chain 2; hemoglobin alpha,<br>adult chain 1 (Hba-a1), mRNA.; hemoglobin alpha,<br>adult chain 1; Synthetic construct Mus musculus clone<br>IMAGE:100062289, MGC:190450 hemoglobin alpha,<br>adult chain 2 (Hba-a2) mRNA, encodes complete<br>protein. | -10.08 |

|                     |                                                                                                                                                                                                                                                                                                                                                                                |        |
|---------------------|--------------------------------------------------------------------------------------------------------------------------------------------------------------------------------------------------------------------------------------------------------------------------------------------------------------------------------------------------------------------------------|--------|
| Acta2               | actin, alpha 2, smooth muscle, aorta                                                                                                                                                                                                                                                                                                                                           | -6.33  |
| Gm14330; AC124590.1 | predicted gene 14330 [Source:MGI Symbol;Acc:MGI:3                                                                                                                                                                                                                                                                                                                              | 2.06   |
| Ost4                | oligosaccharyltransferase 4 homolog (S. cerevisiae)                                                                                                                                                                                                                                                                                                                            | -3.63  |
| LOC100503279        | PREDICTED: uncharacterized LOC100503279 (LOC                                                                                                                                                                                                                                                                                                                                   | -5.4   |
|                     |                                                                                                                                                                                                                                                                                                                                                                                | -4.23  |
|                     |                                                                                                                                                                                                                                                                                                                                                                                | -3.2   |
|                     |                                                                                                                                                                                                                                                                                                                                                                                | -14.52 |
| Jag1                | jagged 1                                                                                                                                                                                                                                                                                                                                                                       | -2.56  |
| Gm24921             | predicted gene, 24921 [Source:MGI Symbol;Acc:MGI:                                                                                                                                                                                                                                                                                                                              | 2.52   |
| Nucb2               | nucleobindin 2                                                                                                                                                                                                                                                                                                                                                                 | -2.89  |
| Gm1866              | predicted gene 1866 [Source:MGISymbol;Acc:MGI:30                                                                                                                                                                                                                                                                                                                               | -2.63  |
|                     |                                                                                                                                                                                                                                                                                                                                                                                | -5.77  |
|                     |                                                                                                                                                                                                                                                                                                                                                                                | -2.69  |
| Amd2; Amd1          | S-adenosylmethionine decarboxylase 2;S-adenosylmet                                                                                                                                                                                                                                                                                                                             | -3.65  |
| Gm19774             | PREDICTED: predicted gene, 19774 (Gm19774), mR                                                                                                                                                                                                                                                                                                                                 | -32.91 |
|                     |                                                                                                                                                                                                                                                                                                                                                                                | 2.14   |
| Ppp6c               | protein phosphatase 6, catalytic subunit                                                                                                                                                                                                                                                                                                                                       | -2.29  |
|                     |                                                                                                                                                                                                                                                                                                                                                                                | 2.2    |
|                     |                                                                                                                                                                                                                                                                                                                                                                                | 2.06   |
|                     |                                                                                                                                                                                                                                                                                                                                                                                | -4.53  |
| LOC100862318        | PREDICTED: uncharacterized LOC100862318,<br>transcript variant 1 (LOC100862318), miscRNA.;<br>PREDICTED: uncharacterized LOC100862318,<br>transcript variant 2 (LOC100862318), miscRNA.;<br>PREDICTED: uncharacterized LOC100862318,<br>transcript variant 3 (LOC100862318), miscRNA.                                                                                          | -3.27  |
| LOC100862073        | PREDICTED: uncharacterized LOC100862073 (LOC                                                                                                                                                                                                                                                                                                                                   | -2.12  |
| Eif5a13-ps          | eukaryotic translation initiation factor 5A-like 3, pseud                                                                                                                                                                                                                                                                                                                      | -4.18  |
| Nt5c                | 5,3-nucleotidase, cytosolic; 5',3'-nucleotidase, cytosolic                                                                                                                                                                                                                                                                                                                     | -2.14  |
| Ndufa10             | NADH dehydrogenase (ubiquinone) 1 alpha subcomple                                                                                                                                                                                                                                                                                                                              | -2.64  |
| Gm12727             | predicted gene 12727 [Source:MGISymbol;Acc:MGI:3                                                                                                                                                                                                                                                                                                                               | -2.41  |
| Ociad2              | OCIA domain containing 2                                                                                                                                                                                                                                                                                                                                                       | -2.44  |
| Gm14269             | predicted gene 14269 [Source:MGISymbol;Acc:MGI:3                                                                                                                                                                                                                                                                                                                               | -3.64  |
| Gm14292             | predicted gene 14292 [Source:MGISymbol;Acc:MGI:3                                                                                                                                                                                                                                                                                                                               | -11.18 |
| Gm12183             | predicted gene 12183                                                                                                                                                                                                                                                                                                                                                           | -2.14  |
| Hba-a2; Hba-a1      | hemoglobin alpha, adult chain 2 (Hba-a2), mRNA.;<br>hemoglobin alpha, adult chain 1; hemoglobin alpha,<br>adult chain 2; hemoglobin alpha, adult chain 1, mRNA<br>(cDNA clone MGC:57888 IMAGE:5684314),<br>complete cds.; Synthetic construct Mus musculus<br>clone IMAGE:100062289, MGC:190450 hemoglobin<br>alpha, adult chain 2 (Hba-a2) mRNA, encodes<br>complete protein. | -17.99 |



|                            |                                                                                                                                                                                                                                                                        |        |
|----------------------------|------------------------------------------------------------------------------------------------------------------------------------------------------------------------------------------------------------------------------------------------------------------------|--------|
| Gm24336                    | predicted gene, 24336 [Source:MGI Symbol;Acc:MGI:5434953]                                                                                                                                                                                                              | -2.94  |
|                            |                                                                                                                                                                                                                                                                        | 3.2    |
| Mrpl24                     | mitochondrial ribosomal protein L24                                                                                                                                                                                                                                    | -2.2   |
| Gm13573                    | predicted gene 13573 [Source:MGI Symbol;Acc:MGI:5434953]                                                                                                                                                                                                               | -3.1   |
| Flna                       | filamin, alpha                                                                                                                                                                                                                                                         | -3.37  |
| Tra2a                      | transformer 2 alpha homolog (Drosophila)                                                                                                                                                                                                                               | -2.52  |
|                            |                                                                                                                                                                                                                                                                        | 2.11   |
| Gm17756                    | PREDICTED: predicted gene, 17756 (Gm17756), mRNA.                                                                                                                                                                                                                      | -2.77  |
| LOC100862145               | PREDICTED: uncharacterized LOC100862145, transcript variant 1 (LOC100862145), miscRNA.; PREDICTED: uncharacterized LOC100862145, transcript variant 2 (LOC100862145), miscRNA.                                                                                         | -2.22  |
| Rnf168                     | ring finger protein 168                                                                                                                                                                                                                                                | -2.37  |
|                            |                                                                                                                                                                                                                                                                        | -2.4   |
|                            |                                                                                                                                                                                                                                                                        | 2.04   |
| Gm13298; Fam205a3;         | predicted gene 13298 (Gm13298), mRNA.; family with sequence similarity 205, member A3 [Source:MGI Symbol;Acc:MGI:5434953]; predicted gene, 21598                                                                                                                       | -2.11  |
| Gm13298; Fam205a2          | predicted gene 13298 (Gm13298), mRNA.; family with sequence similarity 205, member A2 [Source:MGI Symbol;Acc:MGI:3701946]; predicted gene 13298                                                                                                                        | -2.11  |
| LOC100861967               | PREDICTED: uncharacterized LOC100861967, transcript variant 1 (LOC100861967), miscRNA.; PREDICTED: uncharacterized LOC100861967, transcript variant 2 (LOC100861967), miscRNA.; PREDICTED: uncharacterized LOC100861967, transcript variant 3 (LOC100861967), miscRNA. | -2.07  |
| Gm13298; Fam205a4; Gm20938 | predicted gene 13298 (Gm13298), mRNA.; family with sequence similarity 205, member A4 [Source:MGI Symbol;Acc:MGI:5434294]; predicted gene, 20938                                                                                                                       | -2.33  |
| Eef2                       | eukaryotic translation elongation factor 2                                                                                                                                                                                                                             | -4.05  |
| Atp6v1c1                   | ATPase, H <sup>+</sup> transporting, lysosomal V1 subunit C1                                                                                                                                                                                                           | -3.21  |
| Gm5777                     | predicted gene 5777 [Source:MGI Symbol;Acc:MGI:3701946]                                                                                                                                                                                                                | -5.24  |
| Rpl18-ps2                  | ribosomal protein L18, pseudogene 2; 60S ribosomal protein L18                                                                                                                                                                                                         | -9.58  |
| Gm12226                    | predicted pseudogene 12226 [Source:MGI Symbol;Acc:MGI:3701946]                                                                                                                                                                                                         | -2.09  |
| Gm4804                     | predicted gene 4804 [Source:MGI Symbol;Acc:MGI:3701946]                                                                                                                                                                                                                | -2.22  |
| Commd3                     | COMM domain containing 3                                                                                                                                                                                                                                               | -2.8   |
|                            |                                                                                                                                                                                                                                                                        | -2.11  |
| Gm27626                    | predicted gene, 27626 [Source:MGI Symbol;Acc:MGI:5434953]                                                                                                                                                                                                              | -52.49 |
| LOC100862063               | PREDICTED: uncharacterized LOC100862063 (LOC100862063), miscRNA.                                                                                                                                                                                                       | -2.91  |
| Gm14387                    | predicted gene 14387                                                                                                                                                                                                                                                   | -4.73  |

|              |                                                                                                                                                                                                                                                                                                                                                                      |        |
|--------------|----------------------------------------------------------------------------------------------------------------------------------------------------------------------------------------------------------------------------------------------------------------------------------------------------------------------------------------------------------------------|--------|
| Gm16399      | predicted pseudogene 16399 [Source:MGI Symbol;Acc:MGI:356000]                                                                                                                                                                                                                                                                                                        | -5.29  |
| Ufd1l        | ubiquitin fusion degradation 1 like                                                                                                                                                                                                                                                                                                                                  | -2.81  |
|              |                                                                                                                                                                                                                                                                                                                                                                      | -2.24  |
| Gm15621      | predicted gene 15621 [Source:MGI Symbol;Acc:MGI:356000]                                                                                                                                                                                                                                                                                                              | -32.12 |
| Ndufa13      | NADH dehydrogenase (ubiquinone) 1 alpha subcomplex 13                                                                                                                                                                                                                                                                                                                | -6.76  |
| Mir6412      | microRNA 6412                                                                                                                                                                                                                                                                                                                                                        | -4.87  |
|              |                                                                                                                                                                                                                                                                                                                                                                      | -39.98 |
| Gm22735      | predicted gene, 22735                                                                                                                                                                                                                                                                                                                                                | -3.52  |
| Gm14322      | predicted gene 14322                                                                                                                                                                                                                                                                                                                                                 | -3.92  |
| Dnttip1      | deoxynucleotidyltransferase, terminal, interacting protein 1                                                                                                                                                                                                                                                                                                         | -2.06  |
|              |                                                                                                                                                                                                                                                                                                                                                                      | -2.62  |
| Gm8730       | predicted pseudogene 8730 [Source:MGI Symbol;Acc:MGI:356000]                                                                                                                                                                                                                                                                                                         | -3.39  |
| Rps6-ps1     | ribosomal protein S6, pseudogene 1 [Source:MGI Symbol;Acc:MGI:356000]                                                                                                                                                                                                                                                                                                | -29.64 |
|              |                                                                                                                                                                                                                                                                                                                                                                      | -2.15  |
| Amd-ps3      | S-adenosylmethionine decarboxylase, pseudogene 3 [Source:MGI Symbol;Acc:MGI:356000]                                                                                                                                                                                                                                                                                  | -2.31  |
| Slc38a3      | solute carrier family 38, member 3                                                                                                                                                                                                                                                                                                                                   | -2.16  |
| Olfr1324     | olfactory receptor 1324                                                                                                                                                                                                                                                                                                                                              | 2.25   |
| Slc35b1      | solute carrier family 35, member B1                                                                                                                                                                                                                                                                                                                                  | -2.26  |
|              |                                                                                                                                                                                                                                                                                                                                                                      | -14.01 |
| Hist1h2an    | histone cluster 1, H2an                                                                                                                                                                                                                                                                                                                                              | -6.92  |
| Peg3os       | Peg3 opposite strand                                                                                                                                                                                                                                                                                                                                                 | -2.28  |
| Gm10224      | predicted pseudogene 10224                                                                                                                                                                                                                                                                                                                                           | -6.73  |
| Gm22930      | predicted gene, 22930                                                                                                                                                                                                                                                                                                                                                | -2.81  |
| Gm9143       | predicted gene 9143 [Source:MGI Symbol;Acc:MGI:356000]                                                                                                                                                                                                                                                                                                               | -2.26  |
| Gm15500      | predicted pseudogene 15500                                                                                                                                                                                                                                                                                                                                           | -2.45  |
| Gm19831      | PREDICTED: predicted gene, 19831, transcript variant 1 (Gm19831), miscRNA.; PREDICTED: predicted gene, 19831, transcript variant 2 (Gm19831), miscRNA.; PREDICTED: predicted gene, 19831, transcript variant 3 (Gm19831), miscRNA.; PREDICTED: predicted gene, 19831, transcript variant 4 (Gm19831), miscRNA.; PREDICTED: predicted gene, 19831 (Gm19831), miscRNA. | -31.16 |
| Kif1b        | kinesin family member 1B                                                                                                                                                                                                                                                                                                                                             | -2.29  |
| Ppa1         | pyrophosphatase (inorganic) 1                                                                                                                                                                                                                                                                                                                                        | -3.11  |
| Ptprg        | protein tyrosine phosphatase, receptor type, G; Synthetic construct Mus musculus clone IMAGE:100068354, MGC:195898 protein tyrosine phosphatase, receptor type, G (Ptprg) mRNA, encodes complete protein.                                                                                                                                                            | -3.56  |
| LOC100862246 | PREDICTED: uncharacterized LOC100862246 (LOC100862246)                                                                                                                                                                                                                                                                                                               | -4.48  |
| Gm11367      | predicted gene 11367 [Source:MGI Symbol;Acc:MGI:356000]                                                                                                                                                                                                                                                                                                              | -3.75  |
| LOC100861642 | PREDICTED: uncharacterized LOC100861642 (LOC100861642)                                                                                                                                                                                                                                                                                                               | -7.61  |

|               |                                                                                                                                                                                                                                                                                       |        |
|---------------|---------------------------------------------------------------------------------------------------------------------------------------------------------------------------------------------------------------------------------------------------------------------------------------|--------|
|               |                                                                                                                                                                                                                                                                                       | -10.91 |
| Srsf2         | serine/arginine-rich splicing factor 2                                                                                                                                                                                                                                                | -2.82  |
| Gm15733       | predicted gene 15733 [Source:MGI Symbol;Acc:MGI:}                                                                                                                                                                                                                                     | -2.08  |
| Gm23935       | predicted gene, 23935 [Source:MGI Symbol;Acc:MGI:}                                                                                                                                                                                                                                    | -10.36 |
| Ifna11        | interferon alpha 11                                                                                                                                                                                                                                                                   | 2.52   |
| Cd63          | CD63 antigen                                                                                                                                                                                                                                                                          | -2.69  |
| LOC100862094  | PREDICTED: uncharacterized LOC100862094 (LOC                                                                                                                                                                                                                                          | -7.85  |
| LOC100862081  | PREDICTED: uncharacterized LOC100862081 (LOC                                                                                                                                                                                                                                          | -3.14  |
| Ndufb7        | NADH dehydrogenase (ubiquinone) 1 beta subcomplex                                                                                                                                                                                                                                     | -4.01  |
| Sumo1         | small ubiquitin-like modifier 1; SMT3 suppressor of m                                                                                                                                                                                                                                 | -2.89  |
|               |                                                                                                                                                                                                                                                                                       | 2.93   |
| 2310036O22Rik | RIKEN cDNA 2310036O22 gene                                                                                                                                                                                                                                                            | -2.18  |
| Gm22748       | predicted gene, 22748 [Source:MGI Symbol;Acc:MGI:}                                                                                                                                                                                                                                    | -4.35  |
| Zfp938        | zinc finger protein 938                                                                                                                                                                                                                                                               | -6.35  |
| Gm6055        | predicted gene 6055                                                                                                                                                                                                                                                                   | -3.18  |
| Gnai2         | guanine nucleotide binding protein (G protein), alpha i                                                                                                                                                                                                                               | -2.37  |
| Gm9385        | predicted pseudogene 9385                                                                                                                                                                                                                                                             | -2.39  |
| Gm16209       | predicted gene 16209 [Source:MGI Symbol;Acc:MGI:}                                                                                                                                                                                                                                     | -4.87  |
| Gm22694       | predicted gene, 22694 [Source:MGI Symbol;Acc:MGI:}                                                                                                                                                                                                                                    | -2.51  |
|               |                                                                                                                                                                                                                                                                                       | 2.07   |
| Slc18b1       | solute carrier family 18, subfamily B, member 1                                                                                                                                                                                                                                       | -2.63  |
| Gm12821       | predicted gene 12821 [Source:MGI Symbol;Acc:MGI:}                                                                                                                                                                                                                                     | -2.07  |
| Pet100        | PET100 homolog (S. cerevisiae)                                                                                                                                                                                                                                                        | -2.05  |
| Ano1          | anoctamin 1, calcium activated chloride channel                                                                                                                                                                                                                                       | -2.04  |
| Epm2aip1      | EPM2A (laforin) interacting protein 1                                                                                                                                                                                                                                                 | -2.3   |
| Txn1l         | thioredoxin-like 1                                                                                                                                                                                                                                                                    | -5.57  |
| LOC100862227  | PREDICTED: uncharacterized LOC100862227,<br>transcript variant 1 (LOC100862227), miscRNA.;<br>PREDICTED: uncharacterized LOC100862227,<br>transcript variant 2 (LOC100862227), miscRNA.;<br>PREDICTED: uncharacterized LOC100862227,<br>transcript variant 3 (LOC100862227), miscRNA. | -4.74  |
|               |                                                                                                                                                                                                                                                                                       | 2.03   |
| Carm1         | coactivator-associated arginine methyltransferase 1                                                                                                                                                                                                                                   | -2.27  |
| Cds2          | CDP-diacylglycerol synthase (phosphatidate cytidyltr                                                                                                                                                                                                                                  | -4.35  |
| Gm13171       | predicted gene 13171 [Source:MGI Symbol;Acc:MGI:}                                                                                                                                                                                                                                     | -2.53  |
| Ogfrl1        | opioid growth factor receptor-like 1                                                                                                                                                                                                                                                  | -2.11  |
|               |                                                                                                                                                                                                                                                                                       | 2.85   |
| Gm24093       | predicted gene, 24093                                                                                                                                                                                                                                                                 | -2.56  |
| Ndufs3        | NADH dehydrogenase (ubiquinone) Fe-S protein 3                                                                                                                                                                                                                                        | -2.43  |
| Gm24811       | predicted gene, 24811 [Source:MGI Symbol;Acc:MGI:}                                                                                                                                                                                                                                    | -6.44  |
| Nsmce2        | non-SMC element 2 homolog (MMS21, S. cerevisiae)                                                                                                                                                                                                                                      | -2.05  |
| Rab7          | RAB7, member RAS oncogene family                                                                                                                                                                                                                                                      | -18.91 |

|              |                                                                                                                                                                                                                           |        |
|--------------|---------------------------------------------------------------------------------------------------------------------------------------------------------------------------------------------------------------------------|--------|
| Gm19976      | PREDICTED: predicted gene, 19976, transcript variant 6 (Gm19976), miscRNA.; PREDICTED: predicted gene, 19976, transcript variant 8 (Gm19976), miscRNA.                                                                    | -5.24  |
| Pcna         | proliferating cell nuclear antigen                                                                                                                                                                                        | -2.45  |
| Nrd1; Mir761 | nardilysin, N-arginine dibasic convertase, NRD convert                                                                                                                                                                    | -2.76  |
|              |                                                                                                                                                                                                                           | -10.09 |
| Larp7        | La ribonucleoprotein domain family, member 7; Synthetic construct Mus musculus clone IMAGE:100016333, MGC:184518 La ribonucleoprotein domain family, member 7 (Larp7) mRNA, encodes complete protein.                     | -2.07  |
| Rock1        | Rho-associated coiled-coil containing protein kinase 1; Synthetic construct Mus musculus clone IMAGE:100062871, MGC:190980 Rho-associated coiled-coil containing protein kinase 1 (Rock1) mRNA, encodes complete protein. | -4.52  |
| Snord16a     | small nucleolar RNA, C/D box 16A                                                                                                                                                                                          | -3.55  |
|              |                                                                                                                                                                                                                           | 2.06   |
| Gm12632      | predicted gene 12632 [Source:MGI Symbol;Acc:MGI:3                                                                                                                                                                         | -2.3   |
| Gm16412      | predicted pseudogene 16412 [Source:MGI Symbol;Acc                                                                                                                                                                         | -3.83  |
| Gm15644      | predicted gene 15644 [Source:MGI Symbol;Acc:MGI:3                                                                                                                                                                         | -3.32  |
| Gm11336      | predicted gene 11336 [Source:MGI Symbol;Acc:MGI:3                                                                                                                                                                         | -2.24  |
| Gm12428      | predicted gene 12428 [Source:MGI Symbol;Acc:MGI:3                                                                                                                                                                         | -2.12  |
| Gm5514       | predicted gene 5514 [Source:MGI Symbol;Acc:MGI:36                                                                                                                                                                         | -10.91 |
|              |                                                                                                                                                                                                                           | 2.06   |
| Gm17919      | predicted gene, 17919 [Source:MGI Symbol;Acc:MGI:                                                                                                                                                                         | 2.28   |
| Gm2174       | predicted gene 2174 [Source:MGI Symbol;Acc:MGI:37                                                                                                                                                                         | -2.47  |
| March6       | membrane-associated ring finger (C3HC4) 6                                                                                                                                                                                 | -2.07  |
| Vamp1        | vesicle-associated membrane protein 1                                                                                                                                                                                     | -3.12  |
| Snapc1       | small nuclear RNA activating complex, polypeptide 1                                                                                                                                                                       | -2.12  |
| Mir692-1     | microRNA 692-1                                                                                                                                                                                                            | -12.13 |
| Gm6065       | predicted gene 6065 [Source:MGI Symbol;Acc:MGI:36                                                                                                                                                                         | -12.87 |
| Ighv1-63     | immunoglobulin heavy variable V1-63                                                                                                                                                                                       | 7.99   |
| Mir5115      | microRNA 5115 (Mir5115), microRNA.                                                                                                                                                                                        | -5.97  |
| Fam213b      | family with sequence similarity 213, member B                                                                                                                                                                             | -2.21  |
| LOC100861882 | PREDICTED: uncharacterized LOC100861882, transc                                                                                                                                                                           | -11.19 |
| Gm15427      | predicted pseudogene 15427                                                                                                                                                                                                | -59.61 |
|              |                                                                                                                                                                                                                           | -3.8   |
| Npm3-ps1     | nucleoplasmin 3, pseudogene 1                                                                                                                                                                                             | -2.01  |
| Gm6887       | predicted gene 6887 [Source:MGI Symbol;Acc:MGI:36                                                                                                                                                                         | -2.7   |
| Gm23053      | predicted gene, 23053 [Source:MGI Symbol;Acc:MGI:                                                                                                                                                                         | -4.23  |
| Gm19494      | PREDICTED: predicted gene, 19494, transcript varian                                                                                                                                                                       | -11.17 |
| Tsn          | translin                                                                                                                                                                                                                  | -3.45  |

|                     |                                                                  |        |
|---------------------|------------------------------------------------------------------|--------|
| Glrx3; Gm12669      | glutaredoxin 3; glutaredoxin 3 pseudogene                        | -2.88  |
|                     |                                                                  | -2.99  |
| Psmb5; Mir686       | proteasome (prosome, macropain) subunit, beta type 5;            | -11.16 |
|                     |                                                                  | -4.13  |
| Cd248               | CD248 antigen, endosialin                                        | -2.38  |
| Gm14165             | predicted gene 14165 [Source:MGI Symbol;Acc:MGI:3                | -3.76  |
| Gm5558              | predicted gene 5558 [Source:MGI Symbol;Acc:MGI:36                | -38.62 |
| LOC100861650        | PREDICTED: uncharacterized LOC100861650, trans                   | -3.7   |
|                     |                                                                  | 2.02   |
| Slc2a1              | solute carrier family 2 (facilitated glucose transporter),       | -4.03  |
| Gm22800             | predicted gene, 22800 [Source:MGI Symbol;Acc:MGI:                | -3.08  |
| Ndufb6              | NADH dehydrogenase (ubiquinone) 1 beta subcomplex                | -2.86  |
| Nol4                | nucleolar protein 4                                              | -2.43  |
| 210418O10Rik; Gm172 | RIKEN cDNA 2210418O10 gene [Source:MGI Symbo                     | -2     |
| Gm14046             | predicted gene 14046 [Source:MGI Symbol;Acc:MGI:3                | -5.16  |
| Gm23566             | predicted gene, 23566 [Source:MGI Symbol;Acc:MGI:                | -7.29  |
| Atp2a2              | ATPase, Ca <sup>++</sup> transporting, cardiac muscle, slow twic | -3.95  |
| LOC100861805        | PREDICTED: uncharacterized LOC100861805 (LOC                     | -2.58  |
| 2900011O08Rik       | RIKEN cDNA 2900011O08 gene                                       | -2.9   |
| Lancl1              | LanC (bacterial lantibiotic synthetase component C)-lik          | -2.79  |
| Actb                | actin, beta                                                      | -5.2   |
|                     |                                                                  | 2.1    |
| Ldhb                | lactate dehydrogenase B                                          | -2.88  |
| Gm16335             | predicted gene 16335 [Source:MGI Symbol;Acc:MGI:3                | -18.59 |
| Idh3g               | isocitrate dehydrogenase 3 (NAD <sup>+</sup> ), gamma            | -2.96  |
| Ighv5-12-4          | Ighv5-12-4 immunoglobulin heavy variable 5-12-4                  | 2.7    |
|                     |                                                                  | -4.69  |
| Gm14401             | predicted gene 14401 [Source:MGI Symbol;Acc:MGI:3                | -2.15  |
| Lonp2               | lon peptidase 2, peroxisomal                                     | -2.18  |
|                     |                                                                  | 2.26   |
|                     |                                                                  | 2.16   |
|                     |                                                                  | -2.38  |
| Ppp1r14a            | protein phosphatase 1, regulatory (inhibitor) subunit 14         | -2.6   |
| Gm19595             | PREDICTED: predicted gene, 19595 (Gm19595), mis                  | -31.12 |
|                     |                                                                  | 2.5    |
|                     |                                                                  | 2.07   |
| Gm10221             | predicted gene 10221 [Source:MGI Symbol;Acc:MGI:3                | -4.42  |
| Gm23051             | predicted gene, 23051                                            | -3.34  |
| LOC100861675        | PREDICTED: uncharacterized LOC100861675 (LOC                     | -2.37  |
| Kif5b               | kinesin family member 5B                                         | -3.33  |
| Hist1h2af           | histone cluster 1, H2af                                          | -5.16  |
| Gm6969              | predicted pseudogene 6969 [Source:MGI Symbol;Acc:                | -6.68  |
| Gm10243             | predicted gene 10243                                             | -10.28 |
| LOC100861832        | PREDICTED: uncharacterized LOC100861832 (LOC                     | -2.64  |

|                     |                                                                           |        |
|---------------------|---------------------------------------------------------------------------|--------|
| Spata31d1b          | spermatogenesis associated 31 subfamily D, member 1                       | 2.06   |
| Bnip2               | BCL2/adenovirus E1B interacting protein 2                                 | -2.6   |
| Brcc3               | BRCA1/BRCA2-containing complex, subunit 3                                 | -2.37  |
|                     |                                                                           | 2.04   |
| Prpf8               | pre-mRNA processing factor 8                                              | -3.88  |
| Gm12254             | predicted gene 12254 [Source:MGI Symbol;Acc:MGI:3                         | -7.23  |
|                     |                                                                           | 2.49   |
| Hspa4               | heat shock protein 4                                                      | -3.43  |
| Ndufa1              | NADH dehydrogenase (ubiquinone) 1 alpha subcomplex                        | -17.79 |
| Gm11263             | predicted gene 11263 [Source:MGI Symbol;Acc:MGI:3                         | -12.45 |
|                     |                                                                           | -2.07  |
| LOC100862086        | PREDICTED: uncharacterized LOC100862086 (LOC                              | -12.89 |
| Cdr1                | cerebellar degeneration related antigen 1                                 | -8.42  |
| Gm6023              | predicted gene 6023 [Source:MGI Symbol;Acc:MGI:36                         | -2.29  |
| Gm26826             | predicted gene, 26826 [Source:MGI Symbol;Acc:MGI:                         | 2.28   |
| Qrich1              | glutamine-rich 1                                                          | -2.82  |
| Gm14513             | predicted gene 14513 [Source:MGI Symbol;Acc:MGI:3                         | -3.05  |
| Pcna-ps2            | proliferating cell nuclear antigen pseudogene 2 [Source                   | -2.49  |
| Ptprb               | protein tyrosine phosphatase, receptor type, B                            | -4.76  |
| Gm14416             | predicted gene 14416                                                      | -4.56  |
| Gm23190             | predicted gene, 23190 [Source:MGI Symbol;Acc:MGI:                         | -8.94  |
| Atp1a2              | ATPase, Na <sup>+</sup> /K <sup>+</sup> transporting, alpha 2 polypeptide | -3.97  |
| Gm6341              | predicted pseudogene 6341 [Source:MGI Symbol;Acc:                         | -10.14 |
| m20417; RP24-458F14 | predicted gene 20417 [Source:MGI Symbol;Acc:MGI:5                         | -4.91  |
| Gm11478             | predicted gene 11478 [Source:MGI Symbol;Acc:MGI:3                         | -9.4   |
|                     |                                                                           | 2.07   |
| Rpl3                | ribosomal protein L3                                                      | -9.5   |
| Gm25138             | predicted gene, 25138 [Source:MGI Symbol;Acc:MGI:                         | -2.03  |
| Gm15720             | predicted gene 15720 [Source:MGI Symbol;Acc:MGI:3                         | -17.51 |
| Cd81                | CD81 antigen                                                              | -5.08  |
| Crbn                | cereblon; cereblon (Crbn), transcript variant 2, mRNA.                    | -2.64  |
| Plpp3               | phospholipid phosphatase 3                                                | -3.04  |
| Ybx1                | Y box protein 1                                                           | -2.9   |
| Ypel5               | yippee-like 5 (Drosophila)                                                | -2.09  |
| Gm16200             | predicted gene 16200 [Source:MGI Symbol;Acc:MGI:3                         | -13.16 |
| Gm4883              | predicted gene 4883                                                       | -6.02  |
|                     |                                                                           | -6.45  |
| Tardbp              | TAR DNA binding protein                                                   | -3.85  |
| Gm5564              | predicted gene 5564 [Source:MGI Symbol;Acc:MGI:36                         | -9.77  |
| Gm9166              | predicted gene 9166 [Source:MGI Symbol;Acc:MGI:36                         | -4.54  |
| Gm10020             | predicted pseudogene 10020                                                | -10.97 |
| Slc12a2             | solute carrier family 12, member 2                                        | -2.67  |
| Sept4               | septin 4; septin 4 (Sept4), nuclear gene encoding mitoc                   | -2.48  |
|                     |                                                                           | -2.31  |

|              |                                                                  |        |
|--------------|------------------------------------------------------------------|--------|
| Gm19660      | PREDICTED: predicted gene, 19660, transcript varian              | -4.58  |
| Gstp1        | glutathione S-transferase, pi 1                                  | -2.7   |
| Rpl9-ps1     | ribosomal protein L9, pseudogene 1                               | -3.29  |
| Mir669c      | microRNA 669c                                                    | 2.7    |
| Anxa6        | annexin A6                                                       | -2.09  |
| Tgfb3        | transforming growth factor, beta 3                               | -3.09  |
| LOC100861862 | PREDICTED: uncharacterized LOC100861862 (LOC                     | -3.04  |
| Plxnc1       | plexin C1                                                        | -2.02  |
|              |                                                                  | -3.46  |
| Tecr         | trans-2,3-enoyl-CoA reductase                                    | -3.81  |
| Gm23489      | predicted gene, 23489                                            | -3.41  |
|              |                                                                  | -9.67  |
| Gm14421      | predicted gene 14421 [Source:MGI Symbol;Acc:MGI:5                | -3.25  |
|              |                                                                  | -6.43  |
|              |                                                                  | -6.43  |
| Gm23154      | predicted gene, 23154 [Source:MGI Symbol;Acc:MGI:                | -20.66 |
| Mir7033      | microRNA 7033                                                    | 2.07   |
| Psmc7        | proteasome (prosome, macropain) 26S subunit, non-AT              | -4.67  |
| Olfr1167     | olfactory receptor 1167                                          | 2.16   |
| Stk39        | serine/threonine kinase 39                                       | -2.7   |
| Hist1h2aj    | histone cluster 1, H2aj                                          | -6     |
|              |                                                                  | 2.12   |
| Mir3092      | microRNA 3092                                                    | 3      |
| Vdac3        | voltage-dependent anion channel 3                                | -7.88  |
| Tm4sf1       | transmembrane 4 superfamily member 1                             | -2.37  |
| Mir669m-2    | microRNA 669m-2                                                  | -3.26  |
| Gm2214       | predicted gene 2214 [Source:MGI Symbol;Acc:MGI:37                | -11.64 |
| Canx         | calnexin                                                         | -4.36  |
|              |                                                                  | -8.14  |
| Gm23019      | predicted gene, 23019                                            | -10.24 |
| Gm23415      | predicted gene, 23415 [Source:MGI Symbol;Acc:MGI:                | -4.54  |
| Cox7a2       | cytochrome c oxidase subunit VIIa 2                              | -15.96 |
| Gm22584      | predicted gene, 22584 [Source:MGI Symbol;Acc:MGI:                | -20.81 |
| Mir6917      | microRNA 6917                                                    | 2.32   |
| Gm24913      | predicted gene, 24913 [Source:MGI Symbol;Acc:MGI:                | 2.6    |
| Atp5g3       | ATP synthase, H <sup>+</sup> transporting, mitochondrial F0 comp | -2.16  |
| Gm5449       | predicted pseudogene 5449 [Source:MGI Symbol;Acc:                | -3.18  |
| Gm12922      | predicted gene 12922 [Source:MGI Symbol;Acc:MGI:5                | -3.22  |
| Gm16409      | predicted gene 16409 [Source:MGI Symbol;Acc:MGI:5                | -56.32 |
| Gm19474      | PREDICTED: predicted gene, 19474, transcript varian              | -3.56  |
| Oaz1-ps      | ornithine decarboxylase antizyme 1, pseudogene [Sourc            | -12.08 |
| Gm14326      | predicted gene 14326                                             | -11.89 |
| Gm10273      | predicted pseudogene 10273 [Source:MGI Symbol;Acc                | -5.28  |
| Ptgds        | prostaglandin D2 synthase (brain)                                | -3.44  |

|                     |                                                                  |        |
|---------------------|------------------------------------------------------------------|--------|
| Hsp90ab1            | heat shock protein 90 alpha (cytosolic), class B membe           | -6.05  |
| Gm8865              | predicted gene 8865 [Source:MGI Symbol;Acc:MGI:36                | -5.39  |
| Ccnd2               | cyclin D2                                                        | -2.42  |
| Gm16073             | predicted gene 16073 [Source:MGI Symbol;Acc:MGI:3                | -2.38  |
|                     |                                                                  | -6.23  |
| Ighv10-1            | immunoglobulin heavy variable 10-1                               | 2.74   |
| Gm19974             | PREDICTED: predicted gene, 19974 (Gm19974), mis                  | -2.38  |
| Gm5566              | predicted pseudogene 5566                                        | -2.76  |
|                     |                                                                  | -3.12  |
| Uchl1               | ubiquitin carboxy-terminal hydrolase L1                          | -3.33  |
| Gm26365             | predicted gene, 26365 [Source:MGI Symbol;Acc:MGI:                | -3.59  |
| Gm11836             | predicted gene 11836                                             | -4.54  |
| Vim                 | vimentin                                                         | -2.42  |
| Gm5160              | predicted gene 5160 [Source:MGI Symbol;Acc:MGI:36                | -3.38  |
| Arl8b               | ADP-ribosylation factor-like 8B                                  | -4.8   |
| Pitpnb              | phosphatidylinositol transfer protein, beta                      | -2.32  |
| Sdha                | succinate dehydrogenase complex, subunit A, flavoprot            | -2.35  |
| m11008; RP23-83O23. | predicted gene 11008 [Source:MGI Symbol;Acc:MGI:3                | -5.89  |
| Adipor2             | adiponectin receptor 2                                           | -2.72  |
| Cdk19               | cyclin-dependent kinase 19                                       | -5.55  |
| Srsf7               | serine/arginine-rich splicing factor 7                           | -2.64  |
| Wdr74               | WD repeat domain 74                                              | -2.19  |
| Gm23882             | predicted gene, 23882 [Source:MGI Symbol;Acc:MGI:                | -7.85  |
| Gm11518             | predicted gene 11518 [Source:MGI Symbol;Acc:MGI:3                | -13.17 |
| Gm10250             | predicted pseudogene 10250 [Source:MGI Symbol;Acc                | -6.59  |
| Mir7667             | microRNA 7667                                                    | 2.29   |
| Ndufs4              | NADH dehydrogenase (ubiquinone) Fe-S protein 4                   | -6.66  |
|                     |                                                                  | 10.86  |
| Gm6822              | predicted pseudogene 6822                                        | -3.17  |
| Gpi1                | glucose phosphate isomerase 1; glucose phosphate isom            | -2.04  |
| Micu2               | mitochondrial calcium uptake 2                                   | -2.36  |
|                     |                                                                  | 2.21   |
|                     |                                                                  | 2.17   |
| Gm5848              | PREDICTED: predicted pseudogene 5848 (Gm5848),                   | -4.07  |
| Gm3208              | predicted gene 3208 [Source:MGI Symbol;Acc:MGI:37                | 2.01   |
| Gm8172              | predicted pseudogene 8172 [Source:MGI Symbol;Acc:                | -42.33 |
| Gm5915              | predicted pseudogene 5915                                        | -4.87  |
| Cops3               | COP9 (constitutive photomorphogenic) homolog, subu               | -3.25  |
| Atp5a1              | ATP synthase, H <sup>+</sup> transporting, mitochondrial F1 comp | -2.7   |
| Tuba1b              | tubulin, alpha 1B                                                | -4.16  |
| Gm6139              | predicted gene 6139                                              | -5.9   |
| BC002163            | NADH dehydrogenase Fe-S protein 5 pseudogene; cDN                | -3.77  |
| Kif5a               | kinesin family member 5A                                         | -4.34  |
| Crip1               | cysteine-rich protein 1 (intestinal)                             | -3.12  |



|                  |                                                                 |        |
|------------------|-----------------------------------------------------------------|--------|
| Gm11539          | predicted gene 11539 [Source:MGI Symbol;Acc:MGI:602015]         | -3.23  |
| Pcdh9            | protocadherin 9; Synthetic construct Mus musculus clon          | -3.07  |
| D8Ert738e        | DNA segment, Chr 8, ERATO Doi 738, expressed                    | -11.87 |
| Gm6265           | predicted pseudogene 6265                                       | -27    |
| Gm11223          | predicted gene 11223                                            | -2.98  |
| Calm3            | calmodulin 3                                                    | -2.14  |
| Atp5b            | ATP synthase, H <sup>+</sup> transporting mitochondrial F1 comp | -3.18  |
|                  |                                                                 | 3.91   |
| Camk2g           | calcium/calmodulin-dependent protein kinase II gamma            | -2.28  |
| Gm14403          | predicted gene 14403                                            | -4.33  |
| Gm23862          | predicted gene, 23862 [Source:MGI Symbol;Acc:MGI:602015]        | -21.04 |
| Gcnt2            | glucosaminyl (N-acetyl) transferase 2, I-branchingenz           | -2.5   |
| Gm6644           | predicted gene 6644                                             | -2.66  |
| LOC100862001     | PREDICTED: uncharacterized LOC100862001 (LOC                    | -2.11  |
| Eef1b2           | eukaryotic translation elongation factor 1 beta 2               | -2.54  |
|                  |                                                                 | -84.83 |
| Gm12231          | predicted gene 12231                                            | -9.87  |
| Rpl35a-ps2       | ribosomal protein L35A, pseudogene 2                            | -12.82 |
| Mertk            | c-mer proto-oncogene tyrosine kinase; Synthetic constr          | -2.1   |
| Gm23086          | predicted gene, 23086 [Source:MGI Symbol;Acc:MGI:602015]        | -3.3   |
| Gm10123; Gm13493 | predicted pseudogene 10123 [Source:MGI Symbol;Acc:MGI:602015]   | -11.7  |
| Srp9             | signal recognition particle 9                                   | -2.2   |
| Serbp1           | serpine1 mRNA binding protein 1                                 | -2.66  |
| Vtilb            | vesicle transport through interaction with t-SNAREs 1H          | -3.16  |
| Scd1             | stearoyl-Coenzyme A desaturase 1                                | -2.09  |
|                  |                                                                 | 2.29   |
|                  |                                                                 | -11.15 |
| Rpl27-ps1        | ribosomal protein L27, pseudogene 1 [Source:MGI Sy              | -9.94  |
| LOC100861833     | PREDICTED: uncharacterized LOC100861833 (LOC                    | -6.59  |
| Prpf18           | PRP18 pre-mRNA processing factor 18 homolog (yeas               | -2.5   |
|                  |                                                                 | 2.35   |
| Gm8566           | predicted pseudogene 8566 [Source:MGI Symbol;Acc:602015]        | -80.01 |
| Gm12517          | predicted gene 12517 [Source:MGI Symbol;Acc:MGI:602015]         | -3.89  |
| Gm22610          | predicted gene, 22610                                           | -23.14 |
| Gm24518          | predicted gene, 24518 [Source:MGI Symbol;Acc:MGI:602015]        | -8.64  |
| Gm19453          | PREDICTED: predicted gene, 19453 (Gm19453), mis                 | -8.51  |
| Gm20265          | PREDICTED: predicted gene, 20265 (Gm20265), mis                 | 2.22   |
| Tspan3           | tetraspanin 3                                                   | -7.24  |
|                  |                                                                 | 4.26   |
| Gm19491          | PREDICTED: predicted gene, 19491 (Gm19491), mis                 | -4.3   |
|                  |                                                                 | -4.26  |
| Gm27530          | predicted gene, 27530 [Source:MGI Symbol;Acc:MGI:602015]        | 2.1    |
| Hnrnpa2b1        | heterogeneous nuclear ribonucleoprotein A2/B1; hetero           | -2.48  |
| Gm24369          | predicted gene, 24369 [Source:MGI Symbol;Acc:MGI:602015]        | -2.61  |

|                     |                                                           |        |
|---------------------|-----------------------------------------------------------|--------|
| Rpl18a-ps1          | ribosomal protein L18A, pseudogene 1                      | -15.24 |
| Klf6                | Kruppel-like factor 6                                     | -3.01  |
| Gm11810             | predicted gene 11810                                      | -10.06 |
|                     |                                                           | 2      |
| Gm4479              | predicted gene 4479 [Source:MGISymbol;Acc:MGI:37          | -5.56  |
|                     |                                                           | -3.05  |
| Mal                 | myelin and lymphocyte protein, T cell differentiation p   | -4.77  |
| Myl6                | myosin, light polypeptide 6, alkali, smooth muscle and    | -3.26  |
| Slc6a20a            | solute carrier family 6 (neurotransmitter transporter), m | -4.82  |
| Gm14481             | predicted gene 14481 [Source:MGISymbol;Acc:MGI:3          | 2.04   |
| Hipk3; Mir1902      | homeodomain interacting protein kinase 3; microRNA        | -2.02  |
| Gm14429             | predicted gene 14429 [Source:MGISymbol;Acc:MGI:3          | -2.8   |
| Dcn                 | decorin                                                   | -7.16  |
| Gm10198             | predicted gene 10198 [Source:MGISymbol;Acc:MGI:3          | 6.08   |
| Rpl14-ps1           | ribosomal protein L14, pseudogene 1 [Source:MGI Sy        | -5.07  |
| Zfp931              | zinc finger protein 931                                   | -3.24  |
| Gm12778             | predicted gene 12778 [Source:MGISymbol;Acc:MGI:3          | -35.28 |
|                     |                                                           | 20.61  |
|                     |                                                           | 20.61  |
|                     |                                                           | 20.61  |
|                     |                                                           | 20.61  |
|                     |                                                           | 20.61  |
|                     |                                                           | 20.61  |
|                     |                                                           | -2.46  |
|                     |                                                           | 2.78   |
| Gm24079             | predicted gene, 24079 [Source:MGI Symbol;Acc:MGI:         | 2.2    |
|                     |                                                           | -3.1   |
| Gm11060             | predicted gene 11060 [Source:MGISymbol;Acc:MGI:3          | -2.38  |
|                     |                                                           | -3.12  |
| Olf692              | olfactory receptor 692                                    | 2.09   |
| Gm10080             | predicted gene 10080 [Source:MGISymbol;Acc:MGI:3          | -4.94  |
| Gm10015             | predicted gene 10015                                      | -3.95  |
| Rpl35a-ps7          | ribosomal protein L35A, pseudogene 7                      | -24.39 |
| Gm13144             | predicted gene 13144                                      | -2.3   |
| Gm13862             | predicted gene 13862 [Source:MGISymbol;Acc:MGI:3          | -2.23  |
|                     |                                                           | -3.47  |
| Gm25063             | predicted gene, 25063 [Source:MGI Symbol;Acc:MGI:         | -12.6  |
| Rpl18-ps1           | ribosomal protein L18, pseudogene 1                       | -36.34 |
| LOC100862193        | PREDICTED: uncharacterized LOC100862193 (LOC              | -2.7   |
| Gm10275             | predicted pseudogene 10275 [Source:MGI Symbol;Acc         | -2.49  |
| Rplp1               | ribosomal protein, large, P1                              | -27.51 |
| m14944; RP23-302B23 | predicted gene 14944; histocompatibility 2, class II anti | -2.46  |
| Tmed10              | transmembrane emp24-like trafficking protein 10 (yeas     | -3.78  |
| Tuba1a              | tubulin, alpha 1A                                         | -3.92  |

|                 |                                                            |        |
|-----------------|------------------------------------------------------------|--------|
| E030024N20Rik   | RIKEN cDNA E030024N20 gene [Source:MGI Symbol]             | -5.89  |
|                 |                                                            | -3.94  |
| Scp2-ps2        | sterol carrier protein 2, pseudogene 2 [Source:MGI Symbol] | -3.56  |
| Rps19bp1        | ribosomal protein S19 binding protein 1                    | -2.06  |
| Clk3            | CDC-like kinase 3                                          | -2.79  |
| Vps28           | vacuolar protein sorting 28 (yeast)                        | -4.09  |
| Akap8l          | A kinase (PRKA) anchor protein 8-like                      | -2.08  |
|                 |                                                            | 2.06   |
| Gm23407         | predicted gene, 23407 [Source:MGI Symbol;Acc:MGI]          | 2.14   |
| Gm10171         | predicted gene 10171                                       | -6.06  |
| Ptn             | pleiotrophin                                               | -3.13  |
|                 |                                                            | 2.21   |
| Gm17571         | predicted gene, 17571 [Source:MGI Symbol;Acc:MGI]          | -29.99 |
| Rpl3-ps2        | ribosomal protein L3, pseudogene 2                         | -5.87  |
| Gm14391; Gm6710 | predicted gene 14391; predicted gene 6710                  | -2.02  |
|                 |                                                            | 2.03   |
| Gm14732         | predicted gene 14732 [Source:MGI Symbol;Acc:MGI]           | 2.31   |
| Gtf3c6          | general transcription factor IIIC, polypeptide 6, alpha    | -4.93  |
| Gm24264         | predicted gene, 24264 [Source:MGI Symbol;Acc:MGI]          | -16.79 |
| Gm14327         | predicted gene 14327                                       | -2.84  |
| Ubc; Uba52      | ubiquitin C; ubiquitin A-52 residue ribosomal protein f    | -3.58  |
|                 |                                                            | 2.28   |
|                 |                                                            | 20.82  |
|                 |                                                            | 20.82  |
|                 |                                                            | 20.82  |
|                 |                                                            | 20.82  |
|                 |                                                            | 20.82  |
| Ncl             | nucleolin                                                  | -2.76  |
| Gm14150         | predicted gene 14150                                       | -5.13  |
|                 |                                                            | -6.71  |
|                 |                                                            | 2.02   |
| Rpl35a-ps5      | ribosomal protein L35A, pseudogene 5                       | -9.86  |
| Gm26904         | predicted gene, 26904 [Source:MGI Symbol;Acc:MGI]          | -3.87  |
| Tmod2           | tropomodulin 2                                             | -2.9   |
| Gm14279         | predicted gene 14279                                       | -44.08 |
| Gm11631         | predicted gene 11631 [Source:MGI Symbol;Acc:MGI]           | -13.31 |
| Wsb1            | WD repeat and SOCS box-containing 1                        | -3.87  |
|                 |                                                            | -6.15  |
| Rpl8            | ribosomal protein L8                                       | -8.63  |
| Cisd1           | CDGSH iron sulfur domain 1                                 | -2.78  |
| Igfbp7          | insulin-like growth factor binding protein 7               | -4.28  |
| Gm22131         | predicted gene, 22131 [Source:MGI Symbol;Acc:MGI]          | -13.3  |
| Rpl29; Gm8210   | ribosomal protein L29; predicted pseudogene 8210           | -6.84  |
| Gm16355         | predicted gene 16355 [Source:MGI Symbol;Acc:MGI]           | -2.95  |

|           |                                                                 |        |
|-----------|-----------------------------------------------------------------|--------|
| Pnmal1    | PNMA-like 1                                                     | -2.25  |
| Gm25000   | predicted gene, 25000 [Source:MGI Symbol;Acc:MGI:]              | -12.27 |
|           |                                                                 | -2.03  |
| Gm26050   | predicted gene, 26050 [Source:MGI Symbol;Acc:MGI:]              | -3.82  |
| Rpl18a    | ribosomal protein L18A                                          | -8.01  |
| Gm25157   | predicted gene, 25157 [Source:MGI Symbol;Acc:MGI:]              | -16.4  |
| Gm22941   | predicted gene, 22941 [Source:MGI Symbol;Acc:MGI:]              | -16.4  |
| Gm22258   | predicted gene, 22258 [Source:MGI Symbol;Acc:MGI:]              | -16.4  |
| Gm10108   | predicted pseudogene 10108 [Source:MGI Symbol;Acc:MGI:]         | -7.87  |
| Rplp0-ps1 | ribosomal protein, large, P0, pseudogene 1                      | -2.25  |
| Cfdp1     | craniofacial development protein 1                              | -2.5   |
| Gm22851   | predicted gene, 22851 [Source:MGI Symbol;Acc:MGI:]              | -25.95 |
| Gm12038   | predicted gene 12038 [Source:MGI Symbol;Acc:MGI:]               | -8.32  |
|           |                                                                 | -4.53  |
| Ube2l3    | ubiquitin-conjugating enzyme E2L 3                              | -3.71  |
| Gm3934    | PREDICTED: predicted gene 3934 (Gm3934), mRNA                   | -2.78  |
| Rpl28-ps1 | ribosomal protein L28, pseudogene 1                             | -2.74  |
| Gm15846   | predicted gene 15846 [Source:MGI Symbol;Acc:MGI:]               | -5.32  |
| Ifi27     | interferon, alpha-inducible protein 27                          | -2.29  |
| Gm11249   | predicted gene 11249 [Source:MGI Symbol;Acc:MGI:]               | -6.7   |
|           |                                                                 | -2.3   |
| Ethi1     | ethanol induced 1                                               | -3.95  |
|           |                                                                 | -7     |
| Rps6-ps3  | ribosomal protein S6, pseudogene 3 [Source:MGI Symbol;Acc:MGI:] | -21.51 |
| Gm6444    | predicted gene 6444 [Source:MGI Symbol;Acc:MGI:]                | -4     |
| Spry2     | sprouty homolog 2 (Drosophila)                                  | -2.06  |
| Gm12481   | predicted gene 12481                                            | -3.19  |
| Gng11     | guanine nucleotide binding protein (G protein), gamma           | -2.13  |
| Gm16021   | predicted gene 16021 [Source:MGI Symbol;Acc:MGI:]               | -7.82  |
| Gm6767    | predicted gene 6767 [Source:MGI Symbol;Acc:MGI:]                | -5.19  |
|           |                                                                 | -2.43  |
| Gm14537   | predicted gene 14537 [Source:MGI Symbol;Acc:MGI:]               | 2.91   |
|           |                                                                 | -3.55  |
|           |                                                                 | -3.24  |
|           |                                                                 | -2.09  |
|           |                                                                 | 2.03   |
| Gm13772   | predicted gene 13772 [Source:MGI Symbol;Acc:MGI:]               | -7.08  |
| Hsp90b1   | heat shock protein 90, beta (Grp94), member 1                   | -4.09  |
| Gm8842    | PREDICTED: predicted gene 8842, transcript variant              | -2.02  |
| Polr2f    | polymerase (RNA) II (DNA directed) polypeptide F                | -2.68  |
| Sod1      | superoxide dismutase 1, soluble                                 | -6.86  |
| D10Jhu81e | DNA segment, Chr 10, Johns Hopkins University 81 ex             | -2.13  |
| Elovl4    | elongation of very long chain fatty acids (FEN1/Elo2, S         | -2.17  |
| Ik        | IK cytokine                                                     | -5.17  |

|                  |                                                                  |         |
|------------------|------------------------------------------------------------------|---------|
| Atp6ap2          | ATPase, H <sup>+</sup> transporting, lysosomal accessory protein | -2.82   |
| Gm22232          | predicted gene, 22232 [Source:MGI Symbol;Acc:MGI:35]             | -3.3    |
| Gm10181          | predicted gene 10181 [Source:MGI Symbol;Acc:MGI:35]              | 7.22    |
| Gm14288; Gm14440 | predicted gene 14288; predicted gene 14440 (Gm14440)             | -2.94   |
| Gm6285           | predicted gene 6285 [Source:MGI Symbol;Acc:MGI:35]               | -2.01   |
| Gm25040          | predicted gene, 25040 [Source:MGI Symbol;Acc:MGI:35]             | -8.71   |
| Gm22243          | predicted gene, 22243 [Source:MGI Symbol;Acc:MGI:35]             | -3.27   |
| Mir684-1         | microRNA 684-1 (Mir684-1), microRNA.; microRNA                   | -172.48 |
| Gm5921           | predicted gene 5921 [Source:MGI Symbol;Acc:MGI:35]               | -3.7    |
| Slc38a2          | solute carrier family 38, member 2                               | -2.05   |
| Zmat2            | zinc finger, matrin type 2                                       | -2.24   |
| Msl2             | male-specific lethal 2 homolog (Drosophila); male-spe            | -3.02   |
|                  |                                                                  | -10.43  |
| LOC100861724     | PREDICTED: uncharacterized LOC100861724 (LOC                     | 2.59    |
| Gm14296          | predicted gene 14296                                             | -2.16   |
| LOC432823        | similar to hypothetical protein MGC37588, mRNA (cD               | -11.59  |
| Pitpna           | phosphatidylinositol transfer protein, alpha                     | -2.21   |
| Pcbd2            | pterin 4 alpha carbinolamine dehydratase/dimerization            | -3.21   |
|                  |                                                                  | -4.3    |
|                  |                                                                  | -3.55   |
| Rpl31-ps20       | ribosomal protein L31, pseudogene 20                             | -4.8    |
| H2afz            | H2A histone family, member Z                                     | -16.2   |
| Gm23953          | predicted gene, 23953 [Source:MGI Symbol;Acc:MGI:35]             | -7.43   |
| Gm26332          | predicted gene, 26332 [Source:MGI Symbol;Acc:MGI:35]             | -7.43   |
| Gm22863          | predicted gene, 22863 [Source:MGI Symbol;Acc:MGI:35]             | -7.43   |
| Gm24618          | predicted gene, 24618 [Source:MGI Symbol;Acc:MGI:35]             | -7.43   |
| Rpl27-ps2        | ribosomal protein L27, pseudogene 2                              | -7.67   |
| Rps2-ps13        | ribosomal protein S2, pseudogene 13                              | -5.79   |
|                  |                                                                  | -4.91   |
| Rpl15-ps3        | ribosomal protein L15, pseudogene 3                              | -3.14   |
| Gm16111          | predicted gene 16111 [Source:MGI Symbol;Acc:MGI:35]              | -2.13   |
| Mir466f-4        | microRNA 466f-4 [Source:MGI Symbol;Acc:MGI:378]                  | -8.96   |
| Gm23368          | predicted gene, 23368 [Source:MGI Symbol;Acc:MGI:35]             | -5.59   |
| Pdxk             | pyridoxal (pyridoxine, vitamin B6) kinase                        | -4.36   |
| Raph1            | Ras association (RalGDS/AF-6) and pleckstrin homolo              | -2.77   |
| Prkag1           | protein kinase, AMP-activated, gamma 1 non-catalytic             | -5.27   |
| Ctsb             | cathepsin B                                                      | -2.54   |
| Gm24026          | predicted gene, 24026 [Source:MGI Symbol;Acc:MGI:35]             | -5.18   |
| Gm11361          | predicted pseudogene 11361 [Source:MGI Symbol;Acc:MGI:35]        | -6.11   |
| Sparc1           | SPARC-like 1                                                     | -4.63   |
| Smdt1            | single-pass membrane protein with aspartate rich tail 1          | -8.87   |
|                  |                                                                  | -2.16   |
| Gm5451           | predicted gene 5451                                              | -23.3   |
| Gm8991           | predicted pseudogene 8991 [Source:MGI Symbol;Acc:MGI:35]         | -2.52   |

|                          |                                                      |        |
|--------------------------|------------------------------------------------------|--------|
| Mir1191                  | microRNA 1191                                        | -28.06 |
| Gm10029                  | predicted gene 10029                                 | -53.93 |
| Rpl31-ps14               | ribosomal protein L31, pseudogene 14                 | -6.82  |
| Scd2; Mir5114            | stearoyl-Coenzyme A desaturase 2; microRNA 5114      | -5.72  |
| Gm27722                  | predicted gene, 27722 [Source:MGI Symbol;Acc:MGI:]   | 4.66   |
| Gm14288; Gm14440         | predicted gene 14288 (Gm14288), mRNA.; predicted g   | -2.06  |
| Rpl35a-ps4               | ribosomal protein 35A, pseudogene 4                  | -84.44 |
| Rpl35a-ps6               | ribosomal protein L35A, pseudogene 6                 | -84.44 |
| Rpl35a-ps3               | ribosomal protein L35A, pseudogene 3                 | -84.44 |
| Olfr1055                 | olfactory receptor 1055                              | -4.06  |
| Gm22786                  | predicted gene, 22786 [Source:MGI Symbol;Acc:MGI:]   | 2.88   |
| Gm25944                  | predicted gene, 25944 [Source:MGI Symbol;Acc:MGI:]   | -6.97  |
| Gm13433                  | predicted gene 13433 [Source:MGI Symbol;Acc:MGI:]    | -5.78  |
| Copz1                    | coatamer protein complex, subunit zeta 1             | -2.88  |
|                          |                                                      | -3.28  |
| Gm12468                  | predicted gene 12468                                 | -2.26  |
| Olfr1274-ps              | olfactory receptor 1274, pseudogene                  | 2.35   |
| Maf                      | avian musculoaponeurotic fibrosarcoma (v-maf) AS42   | -2.22  |
|                          |                                                      | 2.68   |
|                          |                                                      | 2.45   |
|                          |                                                      | 2.06   |
|                          |                                                      | 4.29   |
| m3893; 4933409K07Rik     | predicted gene 3893; RIKEN cDNA 4933409K07 gene      | -2.04  |
| Gm6311                   | predicted gene 6311 [Source:MGI Symbol;Acc:MGI:]     | -12.63 |
| Gm8203                   | predicted pseudogene 8203                            | -28.99 |
| Gm14399                  | predicted gene 14399                                 | -5.78  |
| 100862170; 4933409K07Rik | PREDICTED: uncharacterized LOC100862170 (LOC         | -3.18  |
| Mir6989                  | microRNA 6989                                        | -19.52 |
|                          |                                                      | -2.09  |
|                          |                                                      | 2.05   |
| Gm17604                  | predicted gene, 17604 [Source:MGI Symbol;Acc:MGI:]   | 19.68  |
| Gatc                     | glutamyl-tRNA(Gln) amidotransferase, subunit C; glut | -5.16  |
| Gm25615                  | predicted gene, 25615 [Source:MGI Symbol;Acc:MGI:]   | -9.56  |
| Gm6238                   | predicted pseudogene 6238                            | -2.25  |
| Gm25738                  | predicted gene, 25738                                | -4.36  |
| 1700055C04Rik            | RIKEN cDNA 1700055C04 gene                           | 2.01   |
| Gm26308                  | predicted gene, 26308 [Source:MGI Symbol;Acc:MGI:]   | 2.42   |
|                          |                                                      | -3.1   |
| Rpl5-ps1                 | ribosomal protein L5, pseudogene 1                   | -11.5  |
| Hprt                     | hypoxanthine guanine phosphoribosyl transferase      | -3.58  |
|                          |                                                      | 4.85   |
| Gm12366                  | predicted gene 12366 [Source:MGI Symbol;Acc:MGI:]    | -5.29  |
|                          |                                                      | -2.31  |
| Gm12666                  | predicted gene 12666                                 | -2.2   |

|               |                                                       |        |
|---------------|-------------------------------------------------------|--------|
|               |                                                       | -11.84 |
| Gm8420        | predicted gene 8420 [Source:MGI Symbol;Acc:MGI:36     | -2.77  |
|               |                                                       | 3.05   |
| Tspan31       | tetraspanin 31                                        | -3.5   |
| 2410015M20Rik | RIKEN cDNA 2410015M20 gene                            | -2.63  |
|               |                                                       | -11.99 |
| Pspa7         | proteasome (prosome, macropain) subunit, alpha type 7 | -2.32  |
| Itm2b         | integral membrane protein 2B                          | -30.93 |
| Akr1a1        | aldo-keto reductase family 1, member A1 (aldehyde red | -2.7   |
| Gm10073       | predicted pseudogene 10073 [Source:MGI Symbol;Acc     | -6.75  |
| Gm27219       | predicted gene 27219 [Source:MGI Symbol;Acc:MGI:5     | -4.58  |
| Prdx4         | peroxiredoxin 4                                       | -3.75  |
| Snord82       | small nucleolar RNA, C/D box 82                       | 5.59   |
| Gm26250       | predicted gene, 26250 [Source:MGI Symbol;Acc:MGI:     | -2.24  |
|               |                                                       | 2.24   |
| Gm6293        | predicted pseudogene 6293                             | -3.61  |
|               |                                                       | 2.35   |
| Gm6712        | predicted gene 6712 [Source:MGI Symbol;Acc:MGI:36     | -5.59  |
| Gm24729       | predicted gene, 24729 [Source:MGI Symbol;Acc:MGI:     | 2.27   |
| Dld           | dihydrolipoamide dehydrogenase                        | -2.01  |
| Gm22201       | predicted gene, 22201 [Source:MGI Symbol;Acc:MGI:     | 2.12   |
| Rpl31-ps17    | ribosomal protein L31, pseudogene 17                  | -4.93  |
| Far1          | fatty acyl CoA reductase 1                            | -2.09  |
| Gm17150       | predicted gene 17150 [Source:MGI Symbol;Acc:MGI:4     | -6.89  |
| Gm6109        | PREDICTED: predicted gene 6109 (Gm6109), mRNA         | -6.54  |
| Rps4x         | ribosomal protein S4, X-linked; ribosomal protein S4, | -7.79  |
|               |                                                       | -2.92  |
| Rpl17-ps4     | ribosomal protein L17, pseudogene 4                   | -3.05  |
| Gm11930       | predicted gene 11930 [Source:MGI Symbol;Acc:MGI:3     | -3.5   |
|               |                                                       | -3.29  |
|               |                                                       | -4.97  |
| Gm25693       | predicted gene, 25693 [Source:MGI Symbol;Acc:MGI:     | -3.26  |
| Cct5          | chaperonin containing Tcp1, subunit 5 (epsilon)       | -3.15  |
| Gm13246       | predicted gene 13246 [Source:MGI Symbol;Acc:MGI:3     | -2.82  |
| 4632427E13Rik | RIKEN cDNA 4632427E13 gene                            | -2.41  |
| Sar1b         | SAR1 gene homolog B (S. cerevisiae)                   | -2.07  |
| Nedd4         | neural precursor cell expressed, developmentally down | -4.11  |
| Gm12728       | predicted gene 12728 [Source:MGI Symbol;Acc:MGI:3     | -3.34  |
| Rps15-ps2     | ribosomal protein S15, pseudogene 2                   | -2.78  |
|               |                                                       | 2.57   |
| Flrt2         | fibronectin leucine rich transmembrane protein 2      | -2.06  |
| Gm10247       | predicted gene 10247 [Source:MGI Symbol;Acc:MGI:3     | -50.28 |
| Gm9794        | PREDICTED: predicted pseudogene 9794 (Gm9794),        | -9.05  |
| Gm26053       | predicted gene, 26053                                 | -18.06 |

|                     |                                                              |        |
|---------------------|--------------------------------------------------------------|--------|
| Srsf11              | serine/arginine-rich splicing factor 11; serine/arginine-r   | -2.15  |
| Rpl31-ps1           | ribosomal protein L31, pseudogene 1 [Source:MGI Sy           | -3.59  |
|                     |                                                              | -30.57 |
| Gm11969             | predicted gene 11969 [Source:MGI Symbol;Acc:MGI:3            | -2.29  |
|                     |                                                              | -2.52  |
| Gm12328             | predicted gene 12328 [Source:MGI Symbol;Acc:MGI:3            | -8.84  |
| Gm23767             | predicted gene, 23767 [Source:MGI Symbol;Acc:MGI:            | -16.71 |
| Rps6-ps2            | ribosomal protein S6, pseudogene 2 [Source:MGI Sym           | -2.02  |
| Atp6v1e1            | ATPase, H <sup>+</sup> transporting, lysosomal V1 subunit E1 | -3.51  |
| Rpl19-ps12          | ribosomal protein L19, pseudogene 12                         | -3.92  |
| Resp18              | regulated endocrine-specific protein 18                      | -7.6   |
| Gm12341             | predicted gene 12341 [Source:MGI Symbol;Acc:MGI:3            | -3.1   |
| Rps2-ps10           | ribosomal protein S2, pseudogene 10 [Source:MGI Sym          | -8.01  |
| Rpl10a-ps1          | ribosomal protein L10A, pseudogene 1                         | -7.58  |
| Rpl31-ps11          | ribosomal protein L31, pseudogene 11                         | -5.21  |
| Slc6a6              | solute carrier family 6 (neurotransmitter transporter, tau   | -2.3   |
| Ppargc1a            | peroxisome proliferative activated receptor, gamma, co       | -2.12  |
| Gm24298             | predicted gene, 24298 [Source:MGI Symbol;Acc:MGI:            | -2.26  |
| Cltb                | clathrin, light polypeptide (Lcb)                            | -2.19  |
| Gm17428             | predicted gene, 17428 [Source:MGI Symbol;Acc:MGI:            | 6.35   |
| Gm23045             | predicted gene, 23045 [Source:MGI Symbol;Acc:MGI:            | -3.02  |
| Dnajc19             | DnaJ (Hsp40) homolog, subfamily C, member 19                 | -2.88  |
| Actg1; Mir6935      | actin, gamma, cytoplasmic 1; microRNA 6935                   | -4.69  |
| Mff                 | mitochondrial fission factor                                 | -2.09  |
|                     |                                                              | 8.92   |
| Gm16199             | predicted gene 16199 [Source:MGISymbol;Acc:MGI:3             | -5.9   |
|                     |                                                              | 2.31   |
| Ssfa2               | sperm specific antigen 2                                     | -2.53  |
| Gm23728             | predicted gene, 23728                                        | -13.47 |
| Gm20091             | predicted gene, 20091                                        | -11.19 |
| Gm14813             | predicted gene 14813 [Source:MGISymbol;Acc:MGI:3             | -2.07  |
| 2010107E04Rik       | RIKEN cDNA 2010107E04 gene                                   | -15.63 |
| LOC100861939        | PREDICTED: uncharacterized LOC100861939, transcr             | -2.33  |
| Gm25428             | predicted gene, 25428 [Source:MGI Symbol;Acc:MGI:            | 2.36   |
| Gm12350             | predicted gene 12350 [Source:MGISymbol;Acc:MGI:3             | -8.01  |
| Gm27684             | predicted gene, 27684 [Source:MGI Symbol;Acc:MGI:            | -14.95 |
| 1110004F10Rik       | RIKEN cDNA 1110004F10 gene                                   | -2.14  |
| Gm27935             | predicted gene, 27935 [Source:MGI Symbol;Acc:MGI:            | -5.91  |
| Gm26581; RP23-58L22 | predicted gene, 26581 [Source:MGI Symbol;Acc:MGI:            | 2.19   |
| Sdhb                | succinate dehydrogenase complex, subunit B, iron sulfu       | -2.14  |
| Rpl4                | ribosomal protein L4                                         | -14.21 |
| Gm4853              | predicted pseudogene 4853                                    | -3.65  |
| Gm2389              | predicted pseudogene 2389 [Source:MGI Symbol;Acc:            | -8.22  |
| Gm25128             | predicted gene, 25128 [Source:MGI Symbol;Acc:MGI:            | -5.89  |



|                       |                                                     |         |
|-----------------------|-----------------------------------------------------|---------|
| Rps12-ps26            | ribosomal protein S12, pseudogene 26 [Source:MGI Sy | -5.25   |
| Gm14405               | predicted gene 14405 (Gm14405), non-coding RNA.; p  | -2.71   |
| Tmem30                | transmembrane protein 30A                           | -3.55   |
| a Rap2a               | RAS related protein 2a                              | -2.04   |
|                       |                                                     | -6.35   |
| Gm11971               | predicted gene 11971 [Source:MGISymbol;Acc:MGI:3    | -9.21   |
| Snord14e              | small nucleolar RNA, C/D box 14E                    | -17.03  |
| Gm26469               | predicted gene, 26469 [Source:MGI Symbol;Acc:MGI:   | -6.14   |
| Ndufa4                | NADH dehydrogenase (ubiquinone) 1 alpha subcomple   | -6.43   |
| Snrpd2                | small nuclear ribonucleoprotein D2                  | -2.5    |
| Mir7053               | microRNA 7053                                       | 2.07    |
| Gm14288; Gm14435      | predicted gene 14288 (Gm14288), mRNA.; predicted g  | -2.32   |
| Serinc1               | serine incorporator 1                               | -11.63  |
| Gm11172               | predicted gene 11172 [Source:MGISymbol;Acc:MGI:3    | 5.33    |
| Gm22631               | predicted gene, 22631 [Source:MGI Symbol;Acc:MGI:   | -31.72  |
|                       |                                                     | -5.92   |
| Gm25591               | predicted gene, 25591 [Source:MGI Symbol;Acc:MGI:   | -2.83   |
| Gm13841; Rpl29        | predicted gene 13841; ribosomal protein L29, mRNA ( | -6.93   |
| Gm24710               | predicted gene, 24710 [Source:MGI Symbol;Acc:MGI:   | -3.38   |
| Gm24135               | predicted gene, 24135 [Source:MGI Symbol;Acc:MGI:   | -3.38   |
| Gm13252               | predicted gene 13252 [Source:MGISymbol;Acc:MGI:3    | -3.57   |
| Mir28c                | microRNA 28c (Mir28c), microRNA.                    | 4.3     |
| 430; Gm14434; 0610010 | predicted gene 14308 (Gm14308), mRNA.; predicted g  | -4.69   |
| Gm26818               | predicted gene, 26818 [Source:MGI Symbol;Acc:MGI:   | -3.34   |
| Gm24233               | predicted gene, 24233 [Source:MGI Symbol;Acc:MGI:   | 2.31    |
| Gm8841                | PREDICTED: predicted gene 8841 (Gm8841), mRNA       | -7.06   |
| Rpl3-ps1              | ribosomal protein L3, pseudogene 1                  | -2.81   |
| P4hb                  | prolyl 4-hydroxylase, beta polypeptide              | -2.82   |
|                       |                                                     | -2.68   |
| Mir684-1              | microRNA 684-1 (Mir684-1), microRNA.; microRNA      | -157.28 |
| Mir684-1              | microRNA 684-1 (Mir684-1), microRNA.; microRNA      | -157.28 |
| Mir684-1              | microRNA 684-1 (Mir684-1), microRNA.; microRNA      | -157.28 |
| Mir684-1              | microRNA 684-1 (Mir684-1), microRNA.; microRNA      | -157.28 |
| Mir684-1              | microRNA 684-1 (Mir684-1), microRNA.; microRNA      | -157.28 |
| Selk                  | selenoprotein K                                     | -2.54   |
| Gm24586               | predicted gene, 24586 [Source:MGI Symbol;Acc:MGI:   | -4.47   |
| Akt3                  | thymoma viral proto-oncogene 3                      | -3.09   |
| Gm5844                | predicted gene 5844 [Source:MGISymbol;Acc:MGI:36    | -2.33   |
| Der1l                 | Der1-like domain family, member 1                   | -2.35   |
| Gm14412               | predicted gene 14412 [Source:MGISymbol;Acc:MGI:3    | -5.45   |
| Gm15483               | predicted gene 15483                                | -3.58   |
| Gm16100               | predicted gene 16100 [Source:MGISymbol;Acc:MGI:3    | -2.13   |
| Gm10260               | predicted gene 10260 [Source:MGISymbol;Acc:MGI:3    | -5.68   |
| Cox4i1                | cytochrome c oxidase subunit IV isoform 1           | -2.51   |

|            |                                                          |         |
|------------|----------------------------------------------------------|---------|
| Fxyd1      | FXYP domain-containing ion transport regulator 1         | -2.45   |
| Ube2n      | ubiquitin-conjugating enzyme E2N                         | -2.14   |
| Rpl29-ps5  | ribosomal protein L29, pseudogene 5 [Source:MGI Sy       | -3.05   |
| Mir1951    | microRNA 1951                                            | 2.21    |
|            |                                                          | -2.09   |
| Gm23221    | predicted gene, 23221                                    | 2.13    |
| Gm27529    | predicted gene, 27529 [Source:MGI Symbol;Acc:MGI:        | -33.75  |
| Rpl27a-ps2 | ribosomal protein L27A, pseudogene 2 [Source:MGI S       | -2.17   |
| Gm17541    | predicted gene, 17541 [Source:MGI Symbol;Acc:MGI:        | -7.08   |
| Gm20391    | predicted gene 20391 [Source:MGI Symbol;Acc:MGI:5        | 2.46    |
| Gm14419    | predicted gene 14419                                     | -5.8    |
| Gabra3     | gamma-aminobutyric acid (GABA) A receptor, subunit       | -2.16   |
| Rpl31-ps16 | ribosomal protein L31, pseudogene 16                     | -6.09   |
| Gm23089    | predicted gene, 23089 [Source:MGI Symbol;Acc:MGI:        | -28.78  |
| Gm24711    | predicted gene, 24711 [Source:MGI Symbol;Acc:MGI:        | -28.78  |
| Gm26188    | predicted gene, 26188 [Source:MGI Symbol;Acc:MGI:        | -28.78  |
|            |                                                          | -2.43   |
| Pik3r1     | phosphatidylinositol 3-kinase, regulatory subunit, polyp | -2.16   |
| Gm1840     | predicted gene 1840 [Source:MGI Symbol;Acc:MGI:30        | -12.07  |
| Gm22030    | predicted gene, 22030 [Source:MGI Symbol;Acc:MGI:        | -5.74   |
| Tmem147    | transmembrane protein 147                                | -6.72   |
|            |                                                          | -2.97   |
|            |                                                          | -3.02   |
| Gm5787     | predicted gene 5787 [Source:MGI Symbol;Acc:MGI:38        | -2.15   |
| Gm1821     | predicted gene 1821 (Gm1821), non-coding RNA.; ubi       | -18.68  |
| Gm12159    | predicted gene 12159                                     | 2.36    |
| Gm7502     | predicted gene 7502 [Source:MGI Symbol;Acc:MGI:36        | -2.36   |
| Gm14630    | predicted gene 14630 [Source:MGI Symbol;Acc:MGI:3        | -2.21   |
| Gm24139    | predicted gene, 24139                                    | -2      |
| Higd2a     | HIG1 domain family, member 2A                            | -4.49   |
| Ube2k      | ubiquitin-conjugating enzyme E2K                         | -2.01   |
| Gm17268    | predicted gene, 17268 [Source:MGI Symbol;Acc:MGI:        | 2.49    |
| Gm26983    | predicted gene, 26983 [Source:MGI Symbol;Acc:MGI:        | -2.22   |
|            |                                                          | 2.07    |
| Gm11942    | predicted gene 11942 [Source:MGI Symbol;Acc:MGI:3        | -17.52  |
| Gm8927     | predicted gene 8927 [Source:MGI Symbol;Acc:MGI:36        | -2.94   |
|            |                                                          | -2.05   |
| Mrps36-ps1 | mitochondrial ribosomal protein S36, pseudogene 1 [So    | -5.97   |
| Trappc11   | trafficking protein particle complex 11                  | -2.69   |
| Abhd3      | abhydrolase domain containing 3                          | -2.97   |
| Rpl30-ps11 | ribosomal protein L30, pseudogene 11                     | -5.42   |
| Layn       | layilin                                                  | -3.24   |
| Gm19475    | PREDICTED: predicted gene, 19475 (Gm19475), mR           | -3.6    |
| Mir684-2   | microRNA 684-2; microRNA 684-2 (Mir684-2), micro         | -122.24 |

|                      |                                                        |        |
|----------------------|--------------------------------------------------------|--------|
| Rpl31-ps10           | ribosomal protein L31, pseudogene 10                   | -4.82  |
| Rpl15-ps2            | ribosomal protein L15, pseudogene 2                    | -5.27  |
| Gm25839              | predicted gene, 25839 [Source:MGI Symbol;Acc:MGI:3     | 2.77   |
| Gm13436              | predicted gene 13436                                   | -2.5   |
| Mir142               | microRNA 142                                           | 2.52   |
| Pomp                 | proteasome maturation protein                          | -12.72 |
| Rnaset2a; Rnaset2b   | ribonuclease T2A; ribonuclease T2B (Rnaset2b), mRN     | -4.81  |
| Gm22173              | predicted gene, 22173 [Source:MGI Symbol;Acc:MGI:3     | -32.86 |
| Gm24691              | predicted gene, 24691 [Source:MGI Symbol;Acc:MGI:3     | 2.05   |
| Dstn                 | destrin                                                | -3.47  |
| Gm10540              | predicted gene 10540 [Source:MGI Symbol;Acc:MGI:3      | -4.16  |
| Pcnp                 | PEST proteolytic signal containing nuclear protein     | -3.24  |
| Gm20430              | predicted gene 20430 [Source:MGI Symbol;Acc:MGI:3      | -60.67 |
| Gm10913              | predicted pseudogene 10913                             | -4.21  |
|                      |                                                        | -3.3   |
| Gm10343              | predicted gene 10343 [Source:MGI Symbol;Acc:MGI:3      | -6.26  |
| Polb                 | polymerase (DNA directed), beta                        | -2.73  |
| Gm15961; RP23-455J6. | predicted gene 15961 [Source:MGI Symbol;Acc:MGI:3      | -2.56  |
| Eif4h                | eukaryotic translation initiation factor 4H            | -4.68  |
| Ctnnb1; Mir7090      | catenin (cadherin associated protein), beta 1; microRN | -2.54  |
| Gm9174               | predicted pseudogene 9174 [Source:MGI Symbol;Acc:      | -5.44  |
| Rpl9-ps4             | ribosomal protein L9, pseudogene 4 [Source:MGI Sym     | -16.48 |
| Gm27459              | predicted gene, 27459 [Source:MGI Symbol;Acc:MGI:3     | -6.46  |
| Sparc                | secreted acidic cysteine rich glycoprotein             | -2.1   |
| Gm6747               | PREDICTED: predicted gene 6747, transcript variant     | -9.87  |
| Hagh                 | hydroxyacyl glutathione hydrolase                      | -2.01  |
| Rpl9-ps7             | ribosomal protein L9, pseudogene 7                     | -9.88  |
| Gm12704              | predicted gene 12704 [Source:MGI Symbol;Acc:MGI:3      | -2.25  |
|                      |                                                        | 2.75   |
|                      |                                                        | -2.23  |
|                      |                                                        | -2.62  |
| Rpl19-ps4; Gm27506   | ribosomal protein L19, pseudogene 4 [Source:MGI Sy     | -5.27  |
| Gm8062               | predicted pseudogene 8062 [Source:MGI Symbol;Acc:      | -3.26  |
| Ephx1                | epoxide hydrolase 1, microsomal                        | -3.1   |
|                      |                                                        | -2.3   |
| Grin3a               | glutamate receptor ionotropic, NMDA3A; glutamate re    | -2.21  |
|                      |                                                        | 2.01   |
| Gm26502              | predicted gene, 26502 [Source:MGI Symbol;Acc:MGI:3     | -36.66 |
| Gm23313              | predicted gene, 23313 [Source:MGI Symbol;Acc:MGI:3     | -36.66 |
| Gm23446              | predicted gene, 23446 [Source:MGI Symbol;Acc:MGI:3     | -36.66 |
| Gm20094              | PREDICTED: predicted gene, 20094 (Gm20094), mR         | -8.46  |
|                      |                                                        | -4.75  |
| Cpt1a                | carnitine palmitoyltransferase 1a, liver               | -3.3   |
| Rpl27-ps3            | ribosomal protein L27, pseudogene 3 [Source:MGI Sy     | -24.31 |

|                        |                                                        |        |
|------------------------|--------------------------------------------------------|--------|
| Rpl19                  | ribosomal protein L19                                  | -3.91  |
| Atxn10                 | ataxin 10                                              | -2.67  |
| Mir1195                | microRNA 1195                                          | -3.59  |
| Gm25407                | predicted gene, 25407 [Source:MGI Symbol;Acc:MGI:]     | 2.14   |
|                        |                                                        | 2.21   |
| Gm10039                | predicted pseudogene 10039                             | -6.32  |
| Tdrd3                  | tudor domain containing 3                              | -2.52  |
| Gmps                   | guanine monophosphate synthetase; guanine monphosp     | -2.15  |
| Gm10217                | predicted gene 10217 [Source:MGI Symbol;Acc:MGI:]      | -6.62  |
| Rps18-ps3              | ribosomal protein S18, pseudogene 3 [Source:MGI Sy a   | -7.17  |
| LOC100862257           | PREDICTED: uncharacterized LOC100862257 (LOC           | -3.9   |
| Gm5481                 | PREDICTED: predicted gene 5481 (Gm5481), mRNA          | -15.98 |
| Utrn                   | utrophin                                               | -2.91  |
|                        |                                                        | -3.83  |
| Gm22358                | predicted gene, 22358 [Source:MGI Symbol;Acc:MGI:]     | -9.84  |
|                        |                                                        | 2.75   |
| Gm19353                | predicted gene, 19353 [Source:MGI Symbol;Acc:MGI:]     | -2.92  |
| Mettl5                 | methyltransferase like 5                               | -2.31  |
| Gm26032                | predicted gene, 26032 [Source:MGI Symbol;Acc:MGI:]     | -21.9  |
| Gm22046                | predicted gene, 22046 [Source:MGI Symbol;Acc:MGI:]     | -21.9  |
| Gm25471                | predicted gene, 25471 [Source:MGI Symbol;Acc:MGI:]     | -21.9  |
| Gm25210                | predicted gene, 25210 [Source:MGI Symbol;Acc:MGI:]     | -21.9  |
| m21811; 2610005L07R    | predicted gene, 21811; cadherin 11 pseudogene          | -3.25  |
|                        |                                                        | 2.44   |
|                        |                                                        | 2.14   |
| Gm23487                | predicted gene, 23487                                  | -4.05  |
| Gm24588                | predicted gene, 24588 [Source:MGI Symbol;Acc:MGI:]     | -2.83  |
| Gm25233                | predicted gene, 25233                                  | -2.18  |
| Gm5786                 | predicted pseudogene 5786 [Source:MGI Symbol;Acc:]     | -7.48  |
| Gm10254                | predicted gene 10254 [Source:MGI Symbol;Acc:MGI:]      | -2.11  |
| Gm5457                 | predicted pseudogene 5457 [Source:MGI Symbol;Acc:]     | -16.89 |
| Hbb-bt; Hbb-b2; Hbb-b1 | hemoglobin, beta adult t chain; hemoglobin, beta adult | -2.53  |
|                        |                                                        | 2.08   |
| Hist1h2al              | histone cluster 1, H2al                                | -2.48  |
| Gm25350                | predicted gene, 25350 [Source:MGI Symbol;Acc:MGI:]     | -22.19 |
| Gm22128                | predicted gene, 22128 [Source:MGI Symbol;Acc:MGI:]     | -22.19 |
| Gm26246                | predicted gene, 26246 [Source:MGI Symbol;Acc:MGI:]     | -22.19 |
| Gm25597                | predicted gene, 25597 [Source:MGI Symbol;Acc:MGI:]     | -22.19 |
| Gm26201                | predicted gene, 26201 [Source:MGI Symbol;Acc:MGI:]     | -22.19 |
| Gm22812                | predicted gene, 22812 [Source:MGI Symbol;Acc:MGI:]     | -22.19 |
| Gm26433                | predicted gene, 26433 [Source:MGI Symbol;Acc:MGI:]     | -22.19 |
| Gm23357                | predicted gene, 23357 [Source:MGI Symbol;Acc:MGI:]     | -22.19 |
| Gm22110                | predicted gene, 22110 [Source:MGI Symbol;Acc:MGI:]     | -22.19 |
| Gm23724                | predicted gene, 23724 [Source:MGI Symbol;Acc:MGI:]     | -22.19 |

|                     |                                                                          |        |
|---------------------|--------------------------------------------------------------------------|--------|
| Gm23549             | predicted gene, 23549 [Source:MGI Symbol;Acc:MGI:                        | -22.19 |
| Gm26223             | predicted gene, 26223 [Source:MGI Symbol;Acc:MGI:                        | -22.19 |
| Gm23524             | predicted gene, 23524 [Source:MGI Symbol;Acc:MGI:                        | -22.19 |
| Gm26136             | predicted gene, 26136 [Source:MGI Symbol;Acc:MGI:                        | -22.19 |
| Gm24658             | predicted gene, 24658 [Source:MGI Symbol;Acc:MGI:                        | -22.19 |
| Gm23359             | predicted gene, 23359 [Source:MGI Symbol;Acc:MGI:                        | -22.19 |
| Gm24742             | predicted gene, 24742 [Source:MGI Symbol;Acc:MGI:                        | -22.19 |
| Gm23696             | predicted gene, 23696 [Source:MGI Symbol;Acc:MGI:                        | -22.19 |
| Gm26094             | predicted gene, 26094 [Source:MGI Symbol;Acc:MGI:                        | -22.19 |
| Gm11425             | predicted gene 11425                                                     | -5.05  |
| Gm23511             | predicted gene, 23511 [Source:MGI Symbol;Acc:MGI:                        | -4.04  |
|                     |                                                                          | -18.35 |
| Gm14431; Gm8898     | predicted gene 14431 (Gm14431), transcript variant 2,                    | -2.6   |
| 14431; Gm8898; Gm42 | predicted gene 14431; predicted gene 8898 (Gm8898),                      | -2.6   |
| Rpl31-ps13          | ribosomal protein L31, pseudogene 13                                     | -4.27  |
| Gm8662              | predicted gene 8662 [Source:MGI Symbol;Acc:MGI:36                        | -6.22  |
| Gm23141             | predicted gene, 23141 [Source:MGI Symbol;Acc:MGI:                        | -3.13  |
| Rps12-ps21          | ribosomal protein S12, pseudogene 22                                     | -3.56  |
| Rps2-ps6            | ribosomal protein S2, pseudogene 6 [Source:MGI Sym                       | -13.42 |
| Olf1r145            | olfactory receptor 145                                                   | 2.01   |
| Gm12396             | predicted gene 12396                                                     | -6.44  |
|                     |                                                                          | 2.36   |
|                     |                                                                          | -4.36  |
| Gm26414             | predicted gene, 26414                                                    | 2.17   |
| Gm23119             | predicted gene, 23119 [Source:MGI Symbol;Acc:MGI:                        | -5.54  |
| Eif3d               | eukaryotic translation initiation factor 3, subunit D                    | -4.27  |
| Gm4294              | predicted gene 4294 [Source:MGI Symbol;Acc:MGI:37                        | -5.53  |
| Gm2004              | predicted gene 2004                                                      | -4.71  |
| Gm13680             | predicted gene 13680 [Source:MGI Symbol;Acc:MGI:3                        | -14.05 |
| Gm11510             | predicted gene 11510 [Source:MGI Symbol;Acc:MGI:3                        | -4.24  |
| Pgrmc1              | progesterone receptor membrane component 1                               | -8.77  |
| Gm12460             | predicted gene 12460 [Source:MGI Symbol;Acc:MGI:3                        | -2.14  |
| Gm14411             | predicted gene 14411                                                     | -4.43  |
| Gkn3                | gastrokine 3                                                             | -2.29  |
| Prelid1             | PRELI domain containing 1                                                | -2.28  |
|                     |                                                                          | 3.84   |
| Gm15779             | predicted gene 15779 [Source:MGI Symbol;Acc:MGI:3                        | -2.9   |
|                     |                                                                          | -2.67  |
| Gm25074             | predicted gene, 25074 [Source:MGI Symbol;Acc:MGI:                        | -22.79 |
| Gm23308             | predicted gene, 23308 [Source:MGI Symbol;Acc:MGI:                        | 2.47   |
| Atp1b1              | ATPase, Na <sup>+</sup> /K <sup>+</sup> transporting, beta 1 polypeptide | -2.76  |
| Ndufa2              | NADH dehydrogenase (ubiquinone) 1 alpha subcomple                        | -13.19 |
| Eif1-ps1            | eukaryotic translation initiation factor 1, pseudogene 1                 | -10.68 |
| Gm14391; Gm6710     | predicted gene 14391 (Gm14391), transcript variant 1,                    | -2.7   |

|                        |                                                        |        |
|------------------------|--------------------------------------------------------|--------|
| PRINS                  | PRINS RNA                                              | 2.23   |
| Fisl                   | fission 1 (mitochondrial outer membrane) homolog (ye   | -3.2   |
| Gatm                   | glycine amidinotransferase (L-arginine:glycine amidino | -2.69  |
| Gm13094                | predicted gene 13094 [Source:MGI Symbol;Acc:MGI:3      | -11.24 |
| Gatad1                 | GATA zinc finger domain containing 1                   | -2.21  |
| Gm5453                 | predicted gene 5453                                    | -3.35  |
| Kcna1                  | potassium voltage-gated channel, shaker-related subfam | -3.12  |
| 11611; Snord11612; Sno | small nucleolar RNA, C/D box 116-like 1 (Snord11611    | -27.05 |
| 11611; Snord11612; Sno | small nucleolar RNA, C/D box 116-like 1 (Snord11611    | -27.05 |
| 11611; Snord11612; Sno | small nucleolar RNA, C/D box 116-like 1 (Snord11611    | -27.05 |
| 11611; Snord11612; Sno | small nucleolar RNA, C/D box 116-like 1 (Snord11611    | -27.05 |
| 11611; Snord11612; Sno | small nucleolar RNA, C/D box 116-like 1 (Snord11611    | -27.05 |
| 11611; Snord11612; Sno | small nucleolar RNA, C/D box 116-like 1 (Snord11611    | -27.05 |
| 11611; Snord11612; Sno | small nucleolar RNA, C/D box 116-like 1 (Snord11611    | -27.05 |
| 11611; Snord11612; Sno | small nucleolar RNA, C/D box 116-like 1; small nucle   | -27.05 |
| 11611; Snord11612; Sno | small nucleolar RNA, C/D box 116-like 1 (Snord11611    | -27.05 |
| Snord11612             | small nucleolar RNA, C/D box 116-like 2                | -27.05 |
| Snord11611             | small nucleolar RNA, C/D box 116-like 1                | -27.05 |
|                        |                                                        | -2.86  |
| Rny3                   | RNA, Y3 small cytoplasmic (associated with Ro protei   | -65.75 |
| Rny3                   | RNA, Y3 small cytoplasmic (associated with Ro protei   | -65.75 |
| Gm25474                | predicted gene, 25474 [Source:MGI Symbol;Acc:MGI:      | -7.06  |
| Gm22047                | predicted gene, 22047 [Source:MGI Symbol;Acc:MGI:      | -7.06  |
| Gm23619                | predicted gene, 23619 [Source:MGI Symbol;Acc:MGI:      | -7.06  |
| Cdc42                  | cell division cycle 42                                 | -3.46  |
| Gm11628                | predicted gene 11628 [Source:MGI Symbol;Acc:MGI:3      | -2.74  |
| Gm15795                | predicted gene 15795 [Source:MGI Symbol;Acc:MGI:3      | -6.99  |
| Gm11625                | predicted gene 11625 [Source:MGI Symbol;Acc:MGI:3      | -3.59  |
|                        |                                                        | -12.77 |
|                        |                                                        | -12.77 |
|                        |                                                        | -12.77 |
|                        |                                                        | -12.77 |
|                        |                                                        | -12.77 |
| Gm19496                | PREDICTED: predicted gene, 19496 (Gm19496), mis        | -6.31  |
| Hist1h1c               | histone cluster 1, H1c                                 | -2.59  |
|                        |                                                        | -25.5  |
|                        |                                                        | -25.5  |
| Ywhae                  | tyrosine 3-monooxygenase/tryptophan 5-monooxygena      | -2.25  |
| Pias1                  | protein inhibitor of activated STAT 1                  | -5.78  |
| Gm14407                | predicted gene 14407                                   | -2.12  |
|                        |                                                        | 2.04   |
| Smt3h2-ps              | SMT3 suppressor of mif two 3 homolog 2, pseudogene     | -16.16 |
| Ddhd1; Mir5131         | DDHD domain containing 1; microRNA 5131; DDHD          | -2.05  |
| Gm17257                | predicted gene, 17257 [Source:MGI Symbol;Acc:MGI:      | -2.01  |

|                      |                                                                  |        |
|----------------------|------------------------------------------------------------------|--------|
| Snora30              | small nucleolar RNA, H/ACA box 30                                | -6.12  |
|                      |                                                                  | -4.39  |
| s12-ps22; LOC1010557 | ribosomal protein S12, pseudogene 22 [Source:MGI Sy              | -3     |
| Gm25355              | predicted gene, 25355 [Source:MGI Symbol;Acc:MGI:                | -2.25  |
| Gm23064              | predicted gene, 23064 [Source:MGI Symbol;Acc:MGI:                | -2.25  |
| Gm23631              | predicted gene, 23631 [Source:MGI Symbol;Acc:MGI:                | -3.23  |
| Atp5l2-ps            | ATP synthase, H <sup>+</sup> transporting, mitochondrial FO com  | -3.45  |
| Gm22701              | predicted gene, 22701                                            | -2.14  |
| Gm16380              | predicted pseudogene 16380 [Source:MGI Symbol;Acc:               | -2.34  |
| Gm13137              | predicted gene 13137 [Source:MGI Symbol;Acc:MGI:3                | -2.63  |
| Gm19933              | PREDICTED: predicted gene, 19933, transcript varian              | -4.2   |
| Gm25986              | predicted gene, 25986 [Source:MGI Symbol;Acc:MGI:                | -2.06  |
| Smt3h2-ps2           | SMT3 suppressor of mif two 3 homolog 2, pseudogene               | -8.48  |
| Gm7117; Gm10275      | predicted pseudogene 7117 [Source:MGI Symbol;Acc:                | -18.42 |
| Slc38a11             | solute carrier family 38, member 11                              | -2.6   |
|                      |                                                                  | 2.5    |
| Gm14287              | predicted gene 14287 [Source:MGI Symbol;Acc:MGI:3                | -5.17  |
|                      |                                                                  | -2.11  |
| Txn1                 | thioredoxin 1                                                    | -2.06  |
| Gm8444               | predicted gene 8444 [Source:MGI Symbol;Acc:MGI:36                | -2.01  |
| Mir297-1             | microRNA 297-1                                                   | -14.89 |
| Gm14325              | predicted gene 14325                                             | -3.82  |
|                      |                                                                  | -2.13  |
| Gm22852              | predicted gene, 22852 [Source:MGI Symbol;Acc:MGI:                | -2.47  |
| Gm27248              | predicted gene 27248 [Source:MGI Symbol;Acc:MGI:5                | -2.48  |
| Slc25a11             | solute carrier family 25 (mitochondrial carrier oxogluta         | -2.28  |
| Gm6576               | predicted gene 6576 [Source:MGI Symbol;Acc:MGI:36                | -4.36  |
| Rps15a-ps5           | ribosomal protein S15A, pseudogene 5                             | -2.01  |
| Tmem50b              | transmembrane protein 50B                                        | -5.37  |
| Atp5l-ps1            | ATP synthase, H <sup>+</sup> transporting, mitochondrial F0 comp | -3.57  |
|                      |                                                                  | 2.77   |
|                      |                                                                  | -4.55  |
|                      |                                                                  | 2.64   |
| 9430002A10Rik        | RIKEN cDNA 9430002A10 gene                                       | -3.07  |
|                      |                                                                  | 2.23   |
| Gm23876              | predicted gene, 23876 [Source:MGI Symbol;Acc:MGI:                | -3.41  |
|                      |                                                                  | 2.32   |
| Sep15                | selenoprotein                                                    | -2.43  |
| Pdhb                 | pyruvate dehydrogenase (lipoamide) beta                          | -2.41  |
| Gm22188              | predicted gene, 22188 [Source:MGI Symbol;Acc:MGI:                | -20.29 |
|                      |                                                                  | -2.29  |
| Naa38                | N(alpha)-acetyltransferase 38, NatC auxiliary subunit            | -2.29  |
| Gm12482              | predicted gene 12482 [Source:MGI Symbol;Acc:MGI:3                | -2.12  |
| Rpl31-ps7            | ribosomal protein L31, pseudogene 7                              | -2.24  |

|                  |                                                                         |         |
|------------------|-------------------------------------------------------------------------|---------|
| Vkorc111         | vitamin K epoxide reductase complex, subunit 1-like                     | -3.6    |
| Gm25188          | predicted gene, 25188 [Source:MGI Symbol;Acc:MGI:377777]                | -12.16  |
| Gm14388          | predicted gene 14388 [Source:MGI Symbol;Acc:MGI:377777]                 | -2.33   |
| Dhx9             | DEAH (Asp-Glu-Ala-His) box polypeptide 9                                | -2.46   |
| Atp5h            | ATP synthase, H <sup>+</sup> transporting, mitochondrial F0 comp        | -2.1    |
|                  |                                                                         | -163.45 |
| Gm6863           | predicted gene 6863 [Source:MGI Symbol;Acc:MGI:377777]                  | -4.86   |
| Pik3r3           | phosphatidylinositol 3 kinase, regulatory subunit, polyp                | -2.61   |
| Gm7286           | predicted gene 7286 [Source:MGI Symbol;Acc:MGI:377777]                  | -2.59   |
| Gm9159           | predicted gene 9159 [Source:MGI Symbol;Acc:MGI:377777]                  | -2.58   |
|                  |                                                                         | 2.04    |
| Gm4596           | predicted gene 4596 [Source:MGI Symbol;Acc:MGI:377777]                  | -2.16   |
|                  |                                                                         | -3.39   |
| Gm14295          | predicted gene 14295                                                    | -4.67   |
| Gm13202          | predicted gene 13202                                                    | -5.79   |
|                  |                                                                         | 2.78    |
| Gm5139           | predicted gene 5139 [Source:MGI Symbol;Acc:MGI:377777]                  | -2.71   |
|                  |                                                                         | -4.9    |
| Gm22751; Gm12164 | predicted gene, 22751 [Source:MGI Symbol;Acc:MGI:377777]                | -2.72   |
| Cltc             | clathrin, heavy polypeptide (Hc)                                        | -3.87   |
| n-R5s158         | nuclear encoded rRNA 5S 158 [Source:MGI Symbol;Acc:MGI:377777]          | 2.09    |
| Rpl19-ps11       | ribosomal protein L19, pseudogene 11                                    | -14.96  |
| Fads2            | fatty acid desaturase 2                                                 | -3.83   |
| Gm12715          | predicted gene 12715                                                    | -2.26   |
| Ubb; Gm1821      | ubiquitin B; ubiquitin pseudogene                                       | -7.92   |
|                  |                                                                         | -118.95 |
| Gm15393          | predicted gene 15393 [Source:MGI Symbol;Acc:MGI:377777]                 | -3.6    |
| Gm9703           | predicted gene 9703 [Source:MGI Symbol;Acc:MGI:377777]                  | -8.55   |
| Rpl28-ps3        | ribosomal protein L28, pseudogene 3                                     | -3.76   |
| Gm11450          | predicted gene 11450 [Source:MGI Symbol;Acc:MGI:377777]                 | -26.48  |
| Qk               | quaking                                                                 | -3.41   |
| Gm16418          | predicted pseudogene 16418 [Source:MGI Symbol;Acc:MGI:377777]           | -3.74   |
| Gm5561           | predicted gene 5561 [Source:MGI Symbol;Acc:MGI:377777]                  | -3.82   |
| Gm25722          | predicted gene, 25722                                                   | 2.18    |
|                  |                                                                         | 2.01    |
| Pten             | phosphatase and tensin homolog                                          | -3.28   |
| Rps12-ps19       | ribosomal protein S12, pseudogene 19 [Source:MGI Symbol;Acc:MGI:377777] | -7.2    |
| Gm7206           | predicted pseudogene 7206 [Source:MGI Symbol;Acc:MGI:377777]            | -6.5    |
| Gm15745          | predicted gene 15745 [Source:MGI Symbol;Acc:MGI:377777]                 | -2.95   |
|                  |                                                                         | -2.47   |
|                  |                                                                         | -4.26   |
| Rps6-ps4         | ribosomal protein S6, pseudogene 4                                      | -75.19  |
| Csde1            | cold shock domain containing E1, RNA binding                            | -2.36   |
| Gm17511          | predicted gene, 17511                                                   | -3.16   |



|                       |                                                                  |       |
|-----------------------|------------------------------------------------------------------|-------|
| Gm26097               | predicted gene, 26097 [Source:MGI Symbol;Acc:MGI]                | -4.78 |
| Gm10051               | predicted pseudogene 10051                                       | -3.04 |
| Rabac1                | Rab acceptor 1 (prenylated)                                      | -3.69 |
| Gm4184                | PREDICTED: predicted gene 4184 (Gm4184), mRNA                    | -4.77 |
| Drg1                  | developmentally regulated GTP binding protein 1                  | -7.94 |
| Gm22117               | predicted gene, 22117 [Source:MGI Symbol;Acc:MGI]                | -2.51 |
| Gm27731               | predicted gene, 27731 [Source:MGI Symbol;Acc:MGI]                | -2.92 |
| Rnf169                | ring finger protein 169                                          | -2.17 |
| Gm8129                | predicted pseudogene 8129                                        | -5.7  |
| Gm8648                | predicted gene 8648 [Source:MGI Symbol;Acc:MGI:36                | -5.85 |
| Gm10576               | predicted gene 10576                                             | -4.91 |
| Gm5210                | predicted gene 5210 [Source:MGI Symbol;Acc:MGI:36                | -2.56 |
| Ptp4a2                | protein tyrosine phosphatase 4a2                                 | -2.66 |
| Gm14436; Gm8923       | predicted gene 14436; predicted gene 8923                        | -2.14 |
| Snrpd3                | small nuclear ribonucleoprotein D3                               | -3.65 |
|                       |                                                                  | -2.84 |
| Mbip                  | MAP3K12 binding inhibitory protein 1                             | -2.46 |
| Rps8-ps1              | ribosomal protein S8, pseudogene 1 [Source:MGI Sym               | -5.94 |
| Plip                  | plasma membrane proteolipid                                      | -2.04 |
| Rpl14-ps1             | ribosomal protein L14, pseudogene 1                              | -3.81 |
| Gm17383               | predicted gene, 17383 [Source:MGI Symbol;Acc:MGI]                | -8.95 |
| Mpz11                 | myelin protein zero-like 1                                       | -2.24 |
| Gm14420               | predicted gene 14420                                             | -2.19 |
| 434; 0610010B08Rik; G | predicted gene 14308 (Gm14308), mRNA.; predicted g               | -2.35 |
| Bloc1s1               | biogenesis of lysosomal organelles complex-1, subunit            | -2.87 |
|                       |                                                                  | -2.04 |
|                       |                                                                  | 2.02  |
|                       |                                                                  | -2.16 |
|                       |                                                                  | -2.2  |
| Itfg1                 | integrin alpha FG-GAP repeat containing 1                        | -4.83 |
| Atp6ap1               | ATPase, H <sup>+</sup> transporting, lysosomal accessory protein | -2.84 |
| LOC100861804          | PREDICTED: uncharacterized LOC100861804, transc                  | -2.44 |
| Gm13750               | predicted gene 13750 [Source:MGI Symbol;Acc:MGI:3                | -2.72 |
| Irf2bp2               | interferon regulatory factor 2 binding protein 2                 | -2.12 |
| Rpl30-ps5             | ribosomal protein L30, pseudogene 5                              | -2.36 |
| Gm13249               | predicted gene 13249                                             | -2.61 |
| Gm15900               | predicted gene 15900 [Source:MGI Symbol;Acc:MGI:3                | -2.59 |
| Fam107a               | family with sequence similarity 107, member A; family            | -3.82 |
| Gpr3711               | G protein-coupled receptor 37-like 1                             | -2.02 |
| Gm7936                | predicted pseudogene 7936 [Source:MGI Symbol;Acc:                | -3.1  |
| Cox6b1                | cytochrome c oxidase, subunit VIb polypeptide 1                  | -2.35 |
| Cnot4                 | CCR4-NOT transcription complex, subunit 4                        | -2.37 |
|                       |                                                                  | -3.68 |
| Hnrnpa3; Gm6793       | heterogeneous nuclear ribonucleoprotein A3; heterogen            | -4.95 |

|                          |                                                         |        |
|--------------------------|---------------------------------------------------------|--------|
| Gm20563                  | predicted gene, 20563 [Source:MGI Symbol;Acc:MGI:3      | -3.28  |
| Gm5908                   | predicted gene 5908                                     | -4.24  |
| Rps19-ps9                | ribosomal protein S19, pseudogene 9                     | -3.33  |
|                          |                                                         | 26.99  |
| Rps12-ps20               | ribosomal protein S12, pseudogene 20                    | -3.33  |
| Gm22527                  | predicted gene, 22527 [Source:MGI Symbol;Acc:MGI:3      | 3.25   |
| Gm14393                  | predicted gene 14393                                    | -3.62  |
|                          |                                                         | -2.54  |
|                          |                                                         | -2.45  |
| Rpl22l1                  | ribosomal protein L22 like 1                            | -6.78  |
| Gpcpd1                   | glycerophosphocholine phosphodiesterase GDE1 homod      | -3.8   |
|                          |                                                         | -4.11  |
| Gm11808                  | predicted gene 11808 [Source:MGI Symbol;Acc:MGI:3       | -3.97  |
| Tceb1                    | transcription elongation factor B (SIII), polypeptide 1 | -5.53  |
|                          |                                                         | -4.3   |
| Gm19295                  | PREDICTED: predicted gene, 19295 (Gm19295), mis         | -5.86  |
| Gm23785                  | predicted gene, 23785 [Source:MGI Symbol;Acc:MGI:3      | -2.08  |
| Gm26411                  | predicted gene, 26411 [Source:MGI Symbol;Acc:MGI:3      | 2.03   |
|                          |                                                         | -2.39  |
| Tgoln1; Tgoln2           | trans-golgi network protein; trans-golgi network protei | -4.63  |
| Scarna9                  | small Cajal body-specific RNA 9                         | -2.93  |
| Mirlet7a-2               | microRNA let7a-2                                        | 2.76   |
| Gm15459                  | predicted gene 15459                                    | -3.12  |
| Gm15796                  | predicted gene 15796 [Source:MGI Symbol;Acc:MGI:3       | -3.59  |
| Gm1430; Gm14434; 0610010 | predicted gene 14308 (Gm14308), mRNA.; predicted g      | -6.23  |
| Gm15481                  | predicted gene 15481 [Source:MGI Symbol;Acc:MGI:3       | -3.25  |
| Gm13394                  | predicted gene 13394                                    | -6.41  |
| Gm23260                  | predicted gene, 23260 [Source:MGI Symbol;Acc:MGI:3      | 2.41   |
| Rnfl15                   | ring finger protein 115                                 | -2.03  |
| Epas1                    | endothelial PAS domain protein 1                        | -5.88  |
| Gm22802                  | predicted gene, 22802 [Source:MGI Symbol;Acc:MGI:3      | -3.16  |
|                          |                                                         | -4.23  |
| Gm16089                  | predicted gene 16089 [Source:MGI Symbol;Acc:MGI:3       | -3.74  |
| Gm20077                  | PREDICTED: predicted gene, 20077 (Gm20077), mis         | -6.79  |
| Gm20545                  | predicted gene 20545 [Source:MGI Symbol;Acc:MGI:5       | -3.65  |
| Gm25635                  | predicted gene, 25635 [Source:MGI Symbol;Acc:MGI:3      | -3.88  |
| Gm23458                  | predicted gene, 23458 [Source:MGI Symbol;Acc:MGI:3      | -3.79  |
| Gm10705                  | predicted gene 10705                                    | -8     |
| Gm5879                   | predicted gene 5879                                     | -3.81  |
| Gm12755                  | predicted gene 12755 [Source:MGI Symbol;Acc:MGI:3       | -12.31 |
| Gm5805                   | predicted gene 5805 [Source:MGI Symbol;Acc:MGI:36       | -3.32  |
| Gm12669                  | predicted gene 12669                                    | -3.62  |
|                          |                                                         | -6.82  |
|                          |                                                         | 2.52   |

|           |                                                       |       |
|-----------|-------------------------------------------------------|-------|
|           |                                                       | 2.52  |
|           |                                                       | 2.52  |
|           |                                                       | 2.52  |
|           |                                                       | 2.52  |
|           |                                                       | 2.52  |
|           |                                                       | 2.52  |
|           |                                                       | 2.52  |
|           |                                                       | 2.52  |
|           |                                                       | 2.52  |
|           |                                                       | 2.52  |
|           |                                                       | 2.52  |
|           |                                                       | 2.52  |
|           |                                                       | 2.52  |
|           |                                                       | 2.52  |
|           |                                                       | 2.52  |
|           |                                                       | 2.52  |
|           |                                                       | 2.52  |
|           |                                                       | 2.52  |
|           |                                                       | 2.52  |
| Gm6768    | predicted gene 6768 [Source:MGI Symbol;Acc:MGI:35     | -6.07 |
|           |                                                       | -7.26 |
| Arl6ip1   | ADP-ribosylation factor-like 6 interacting protein 1  | -6.69 |
| Rps25-ps1 | ribosomal protein S25, pseudogene 1                   | -4.44 |
| Dph3b-ps  | DPH3B, KTI11 homolog B (S. cerevisiae), pseudogene    | 2.06  |
| Cyc1      | cytochrome c-1                                        | -2.94 |
| Lum       | lumican                                               | -2.41 |
| Psme2b    | protease (prosome, macropain) activator subunit 2B    | -3.12 |
|           |                                                       | 2.23  |
| Cycs      | cytochrome c, somatic                                 | -2.22 |
| Fabp7     | fatty acid binding protein 7, brain                   | -5.04 |
| Gm7308    | predicted pseudogene 7308 [Source:MGI Symbol;Acc:     | -7.39 |
| Tmem184c  | transmembrane protein 184C                            | -2.28 |
| Psmd11    | proteasome (prosome, macropain) 26S subunit, non-AT   | -2.08 |
| Gm26905   | predicted gene, 26905 [Source:MGI Symbol;Acc:MGI:     | -6.93 |
| Gm11281   | predicted gene 11281                                  | -2.78 |
| Gm29376   | predicted gene 29376                                  | -4.98 |
|           |                                                       | -3.33 |
|           |                                                       | -5.23 |
| Mir3475   | microRNA 3475                                         | 3.04  |
| Prpf38a   | PRP38 pre-mRNA processing factor 38 (yeast) domain    | -2.09 |
| Srp54a    | signal recognition particle 54A                       | -4.43 |
| Gm23322   | predicted gene, 23322 [Source:MGI Symbol;Acc:MGI:     | 2.64  |
| Uqcrc     | ubiquinol-cytochrome c reductase, complex III subunit | -5.61 |
| Mir466j   | microRNA 466j [Source:MGI Symbol;Acc:MGI:37833        | -3.66 |
| Uqcrl1    | ubiquinol-cytochrome c reductase, complex III subunit | -3.18 |
|           |                                                       | -3.05 |

|                       |                                                                          |        |
|-----------------------|--------------------------------------------------------------------------|--------|
| 432; Gm14434; 061001  | predicted gene 14308; predicted gene 14430; predicted                    | -2.16  |
| Pcdh7                 | protocadherin 7                                                          | -3.8   |
| 1110032A03Rik         | RIKEN cDNA 1110032A03 gene                                               | -2.07  |
| Gm5559                | predicted gene 5559                                                      | -3.08  |
|                       |                                                                          | -3.28  |
| Gm14409               | predicted gene 14409 [Source:MGISymbol;Acc:MGI:3                         | -4.95  |
| Sepw1                 | selenoprotein W, muscle 1                                                | -3.11  |
| Gm12033               | predicted gene 12033                                                     | -2.87  |
| Gm22776               | predicted gene, 22776 [Source:MGI Symbol;Acc:MGI:                        | -12.48 |
|                       |                                                                          | -5.52  |
| Gm11196               | predicted gene 11196 [Source:MGISymbol;Acc:MGI:3                         | -2     |
| Rpl14; Rpl14-ps1      | ribosomal protein L14; ribosomal protein L14, pseudog                    | -2.69  |
| Rbx1                  | ring-box 1                                                               | -2.78  |
| Gm11511               | predicted gene 11511 [Source:MGISymbol;Acc:MGI:3                         | -2.52  |
| DLG2-AS1_2            | DLG2 antisense RNA 1 conserved region 2                                  | 2.41   |
| Gm6374                | predicted gene 6374                                                      | -2.22  |
| Gm5138                | predicted gene 5138 [Source:MGISymbol;Acc:MGI:37                         | -4.91  |
| m14434; 0610010B08R   | predicted gene 14308 (Gm14308), mRNA.; predicted g                       | -3     |
| Rab2a                 | RAB2A, member RAS oncogene family                                        | -2.25  |
| Gm2606                | predicted pseudogene 2606 [Source:MGI Symbol;Acc:                        | -4.49  |
| Sept7                 | septin 7                                                                 | -2.29  |
| Mrgpra2b              | MAS-related GPR, member A2B                                              | 2.18   |
| Rpl27a-ps1            | ribosomal protein L27A, pseudogene 1 [Source:MGI S                       | -2.74  |
| Gm4835                | predicted pseudogene 4835 [Source:MGI Symbol;Acc:                        | -3.19  |
| Gm22712               | predicted gene, 22712                                                    | -8.71  |
| Atp1b2                | ATPase, Na <sup>+</sup> /K <sup>+</sup> transporting, beta 2 polypeptide | -2.55  |
| Cetn3                 | centrin 3                                                                | -4.16  |
| Rpl30-ps1             | ribosomal protein L30, pseudogene 1                                      | -5.26  |
| Gm12338               | predicted gene 12338                                                     | -9.84  |
| 59; Gm17081; LOC1008  | predicted pseudogene 5859 [Source:MGI Symbol;Acc:                        | -3.86  |
| 430; Gm14434; 0610010 | predicted gene 14308 (Gm14308), mRNA.; predicted g                       | -3.64  |
| Ndufb9                | NADH dehydrogenase (ubiquinone) 1 beta subcomplex                        | -5.8   |
| Rpl19-ps1             | ribosomal protein L19, pseudogene 1                                      | -10.25 |
| Arrdc3                | arrestin domain containing 3                                             | -2.86  |
| Mir6993               | microRNA 6993                                                            | 2.35   |
|                       |                                                                          | 17.33  |
| Rpl31-ps22            | ribosomal protein L31, pseudogene 22                                     | -3.69  |
|                       |                                                                          | -8.6   |
| Rps13-ps1             | ribosomal protein S13, pseudogene 1                                      | -3.75  |
| Gm7363                | predicted gene 7363 [Source:MGISymbol;Acc:MGI:36                         | -5.95  |
| Apoo; Apoo-ps         | apolipoprotein O; apolipoprotein O, pseudogene                           | -2.64  |
| Gm6467                | predicted gene 6467 [Source:MGISymbol;Acc:MGI:36                         | -2.53  |
| Gm5560                | predicted pseudogene 5560                                                | -4.41  |
|                       |                                                                          | 2.32   |

|                      |                                                       |        |
|----------------------|-------------------------------------------------------|--------|
| Rs5-8s1              | 5.8S ribosomal RNA                                    | -3     |
|                      |                                                       | -2.85  |
| Psm3                 | proteasome (prosome, macropain) subunit, alpha type 3 | -6.17  |
| Gm26231              | predicted gene, 26231 [Source:MGI Symbol;Acc:MGI:3    | -4.45  |
| Gm22234              | predicted gene, 22234 [Source:MGI Symbol;Acc:MGI:3    | -4.45  |
| Hist1h2bc            | histone cluster 1, H2bc                               | -5.01  |
| Gm12671              | predicted gene 12671 [Source:MGI Symbol;Acc:MGI:3     | -4.15  |
| Morf4l1              | mortality factor 4 like 1                             | -3.89  |
|                      |                                                       | -3.64  |
|                      |                                                       | -4.02  |
| Gm3756               | predicted gene 3756 [Source:MGI Symbol;Acc:MGI:37     | -4.35  |
|                      |                                                       | -2.81  |
|                      |                                                       | -2.1   |
| Arl5a                | ADP-ribosylation factor-like 5A                       | -2.44  |
| Vmn1r44              | vomerolateral 1 receptor 44                           | 2.22   |
|                      |                                                       | -7.05  |
| Nae1                 | NEDD8 activating enzyme E1 subunit 1                  | -2.12  |
|                      |                                                       | -2.64  |
| Rps19-ps7            | ribosomal protein S19, pseudogene 7                   | -2.12  |
|                      |                                                       | -2.5   |
|                      |                                                       | -4.38  |
| s12-ps23; LOC1008621 | ribosomal protein S12, pseudogene 23 [Source:MGI Sy   | -4.62  |
| Rmst                 | rhabdomyosarcoma 2 associated transcript (non-coding  | -2.13  |
| Scai                 | suppressor of cancer cell invasion                    | -3.01  |
|                      |                                                       | -6.37  |
| Tmem47               | transmembrane protein 47                              | -2.9   |
| Gm11688              | predicted gene 11688 [Source:MGI Symbol;Acc:MGI:3     | -2.55  |
| Gm24008              | predicted gene, 24008 [Source:MGI Symbol;Acc:MGI:3    | 2.11   |
| Gm14036              | predicted gene 14036 [Source:MGI Symbol;Acc:MGI:3     | -5.46  |
| Rps27l               | ribosomal protein S27-like                            | -2.87  |
| Gm15151              | predicted gene 15151 [Source:MGI Symbol;Acc:MGI:3     | -26.72 |
| Gm14946              | predicted gene 14946 [Source:MGI Symbol;Acc:MGI:3     | 2.32   |
| Psm2                 | proteasome (prosome, macropain) subunit, alpha type 2 | -3.13  |
| Usmg5                | upregulated during skeletal muscle growth 5           | -10.9  |
| Tubb2a               | tubulin, beta 2A class IIA                            | -3.19  |
|                      |                                                       | -12.86 |
| Gm27450              | predicted gene, 27450 [Source:MGI Symbol;Acc:MGI:3    | -2.31  |
|                      |                                                       | -3.86  |
| Pts                  | 6-pyruvoyl-tetrahydropterin synthase                  | -3.83  |
| Rps18-ps1            | ribosomal protein S18, pseudogene 1                   | -4.2   |
|                      |                                                       | -2.91  |
| Gm16378              | predicted gene 16378 [Source:MGI Symbol;Acc:MGI:3     | -3.68  |
|                      |                                                       | -3.51  |
| Gm25506              | predicted gene, 25506 [Source:MGI Symbol;Acc:MGI:3    | -2.81  |

|              |                                                       |        |
|--------------|-------------------------------------------------------|--------|
| Wnk1         | WNK lysine deficient protein kinase 1                 | -2.14  |
| Serinc3      | serine incorporator 3                                 | -2.42  |
|              |                                                       | -7.28  |
| LOC100861852 | PREDICTED: uncharacterized LOC100861852, transcribed  | -2.57  |
| Mtch1        | mitochondrial carrier homolog 1 (C. elegans)          | -2.38  |
|              |                                                       | 2.19   |
|              |                                                       | -2.03  |
| Gm12346      | predicted gene 12346 [Source:MGI Symbol;Acc:MGI:3     | -2.26  |
| Snord92      | small nucleolar RNA, C/D box 92                       | -2.65  |
| n-R5s205     | nuclear encoded rRNA 5S 205 [Source:MGI Symbol;A      | 2.21   |
| Psenen       | presenilin enhancer 2 homolog (C. elegans)            | -3.79  |
|              |                                                       | -2.67  |
|              |                                                       | 2.06   |
| Rpl31-ps23   | ribosomal protein L31, pseudogene 23                  | -2.53  |
| Ndufa12      | NADH dehydrogenase (ubiquinone) 1 alpha subcomplex    | -2.32  |
| Rpl36a-ps3   | ribosomal protein L36A, pseudogene 3                  | -2.42  |
| Gm23880      | predicted gene, 23880 [Source:MGI Symbol;Acc:MGI:     | 2.32   |
| Nedd8        | neural precursor cell expressed, developmentally down | -4.09  |
| Vkorc1       | vitamin K epoxide reductase complex, subunit 1        | -6.85  |
| Gm12335      | predicted gene 12335 [Source:MGI Symbol;Acc:MGI:3     | -18.92 |
| Ostc         | oligosaccharyltransferase complex subunit             | -6.46  |
| Gm8858       | predicted gene 8858 [Source:MGI Symbol;Acc:MGI:36     | -4.22  |
|              |                                                       | 2.17   |
| Rtcb         | RNA 2,3-cyclic phosphate and 5-OH ligase; RNA 2',3'   | -4.83  |
| Gm27704      | predicted gene, 27704 [Source:MGI Symbol;Acc:MGI:     | -11.55 |
|              |                                                       | -2.54  |
| Gm5641       | predicted gene 5641 [Source:MGI Symbol;Acc:MGI:36     | -39.96 |
| Gm22990      | predicted gene, 22990 [Source:MGI Symbol;Acc:MGI:     | -2.76  |
| Gm3272       | predicted pseudogene 3272                             | -4.16  |
| Ndrp2        | N-myc downstream regulated gene 2                     | -6.13  |
| Ndufb11      | NADH dehydrogenase (ubiquinone) 1 beta subcomplex     | -5.74  |
| Il6st        | interleukin 6 signal transducer                       | -2.14  |
| Gm7324       | predicted gene 7324 [Source:MGI Symbol;Acc:MGI:36     | -3.06  |
| Gm15719      | predicted gene 15719 [Source:MGI Symbol;Acc:MGI:3     | -4.09  |
| Laptm4a      | lysosomal-associated protein transmembrane 4A         | -3.48  |
|              |                                                       | 2.03   |
|              |                                                       | -2.21  |
|              |                                                       | 2.1    |
| Gm22297      | predicted gene, 22297 [Source:MGI Symbol;Acc:MGI:     | 2.89   |
|              |                                                       | 2.3    |
| Gm4459       | predicted gene 4459 [Source:MGI Symbol;Acc:MGI:37     | -2.01  |
|              |                                                       | 2.03   |
| Hspc1        | heat shock protein 1 (chaperonin 10)                  | -3.09  |
| Snrpn; Snurf | small nuclear ribonucleoprotein N; SNRPN upstream r   | -2.07  |

|                   |                                                                              |        |
|-------------------|------------------------------------------------------------------------------|--------|
| Actg-ps1; Gm23812 | actin, gamma, pseudogene 1 [Source:MGI Symbol;Acc:MGI:37612]                 | -6.1   |
| Rora              | RAR-related orphan receptor alpha                                            | -2.26  |
| Gm23215           | predicted gene, 23215 [Source:MGI Symbol;Acc:MGI:37612]                      | -2.21  |
| Gm14088           | predicted gene 14088 [Source:MGI Symbol;Acc:MGI:37612]                       | -4.06  |
| Gm15487; Atp6v0c  | predicted gene 15487; predicted gene 15487 [Source:MGI Symbol;Acc:MGI:37612] | -3.04  |
| Gm5944            | predicted gene 5944 [Source:MGI Symbol;Acc:MGI:37612]                        | -2.66  |
|                   |                                                                              | -4.24  |
| Gm9844            | predicted pseudogene 9844 [Source:MGI Symbol;Acc:MGI:37612]                  | -2.4   |
| Gm7808            | predicted pseudogene 7808 [Source:MGI Symbol;Acc:MGI:37612]                  | -2.38  |
| Gm12960           | predicted gene 12960                                                         | -2.21  |
| Gm6344            | predicted gene 6344 [Source:MGI Symbol;Acc:MGI:37612]                        | -5.73  |
|                   |                                                                              | -4.84  |
| LOC100862107      | PREDICTED: uncharacterized LOC100862107 (LOC100862107)                       | -2.04  |
| Gm22868           | predicted gene, 22868 [Source:MGI Symbol;Acc:MGI:37612]                      | 2.18   |
| Mir181d           | microRNA 181d                                                                | 2.83   |
|                   |                                                                              | -44.21 |
| Gm15920           | predicted gene 15920 [Source:MGI Symbol;Acc:MGI:37612]                       | -9.37  |
| Gm26463           | predicted gene, 26463 [Source:MGI Symbol;Acc:MGI:37612]                      | -2.72  |
| Gm24975           | predicted gene, 24975 [Source:MGI Symbol;Acc:MGI:37612]                      | -2.72  |
| Gm25100           | predicted gene, 25100 [Source:MGI Symbol;Acc:MGI:37612]                      | -2.72  |
| Gm28019           | predicted gene, 28019 [Source:MGI Symbol;Acc:MGI:37612]                      | -2.72  |
|                   |                                                                              | -2.72  |
| Gm3617            | predicted gene 3617 [Source:MGI Symbol;Acc:MGI:37612]                        | -6.77  |
| Hnrnpab           | heterogeneous nuclear ribonucleoprotein A/B                                  | -2.35  |
| Napb              | N-ethylmaleimide sensitive fusion protein attachment p                       | -2.79  |
| Zfp97             | zinc finger protein 97; Synthetic construct Mus muscul                       | -2.13  |
|                   |                                                                              | -2.04  |
| Gm24463           | predicted gene, 24463 [Source:MGI Symbol;Acc:MGI:37612]                      | -5.25  |
| Gm19868           | PREDICTED: predicted gene, 19868 (Gm19868), mis                              | -11.73 |
|                   |                                                                              | -2.7   |
| Gm23316           | predicted gene, 23316 [Source:MGI Symbol;Acc:MGI:37612]                      | 2.21   |
| Gm22189           | predicted gene, 22189 [Source:MGI Symbol;Acc:MGI:37612]                      | -2.63  |
| A130040M12Rik     | RIKEN cDNA A130040M12 gene (A130040M12Rik),                                  | -2.5   |
| Rps19-ps5         | ribosomal protein S19, pseudogene 5                                          | -4.04  |
|                   |                                                                              | -2.12  |
|                   |                                                                              | 2.04   |
| Mpp6              | membrane protein, palmitoylated 6 (MAGUK p55 subf                            | -2.32  |
| Mir669e           | microRNA 669e                                                                | -14.98 |
| Ghitm             | growth hormone inducible transmembrane protein                               | -4.39  |
| Gm23992           | predicted gene, 23992 [Source:MGI Symbol;Acc:MGI:37612]                      | -3.49  |
|                   |                                                                              | -2.02  |
| Gm5426            | predicted pseudogene 5426 [Source:MGI Symbol;Acc:MGI:37612]                  | -2.61  |
| Rpl38-ps2         | ribosomal protein L38, pseudogene 2                                          | -5     |
| Gm10959           | predicted gene 10959 [Source:MGI Symbol;Acc:MGI:37612]                       | -4.38  |

|            |                                                        |        |
|------------|--------------------------------------------------------|--------|
| Gm15843    | predicted gene 15843 [Source:MGI Symbol;Acc:MGI:3      | -2.91  |
| Gm26170    | predicted gene, 26170 [Source:MGI Symbol;Acc:MGI:      | 2.24   |
|            |                                                        | -2.42  |
| Mir6388    | microRNA 6388                                          | 2.19   |
| Irs2       | insulin receptor substrate 2                           | -3.69  |
| Gm9836     | predicted pseudogene 9836 [Source:MGI Symbol;Acc:      | -16.73 |
|            |                                                        | -2.4   |
| Dram2      | DNA-damage regulated autophagy modulator 2; VDNA       | -2.6   |
| Gm27989    | predicted gene, 27989 [Source:MGI Symbol;Acc:MGI:      | -4.61  |
| Gm10180    | predicted gene 10180 [Source:MGI Symbol;Acc:MGI:3      | -4.83  |
| Gm3699     | predicted gene 3699 [Source:MGI Symbol;Acc:MGI:37      | -4.83  |
| Tes3-ps    | testis derived transcript 3, pseudogene [Source:MGI Sy | -16.77 |
|            |                                                        | 2.16   |
| Rps12-ps3  | ribosomal protein S12, pseudogene 3 [Source:MGI Sym    | -4.02  |
| Gm2546     | predicted gene 2546 [Source:MGI Symbol;Acc:MGI:37      | -5.07  |
| Amfr       | autocrine motility factor receptor                     | -2.07  |
| Ndfip1     | Nedd4 family interacting protein 1                     | -2.49  |
|            |                                                        | -29.16 |
|            |                                                        | -4.59  |
|            |                                                        | -2.32  |
| Gm22510    | predicted gene, 22510 [Source:MGI Symbol;Acc:MGI:      | -3.06  |
| Gm26390    | predicted gene, 26390 [Source:MGI Symbol;Acc:MGI:      | -3.06  |
| Gm26336    | predicted gene, 26336 [Source:MGI Symbol;Acc:MGI:      | -3.06  |
| Rpl31-ps15 | ribosomal protein L31, pseudogene 15                   | -3.34  |
| Gm7336     | predicted gene 7336 [Source:MGI Symbol;Acc:MGI:36      | -4.66  |
| Rpl34-ps1  | ribosomal protein L34, pseudogene 1                    | -2.75  |
| Mir193b    | microRNA 193b                                          | 2.04   |
| Rcan1      | regulator of calcineurin 1                             | -2.08  |
| Gm10232    | predicted pseudogene 10232                             | -2.04  |
| Chmp2a     | charged multivesicular body protein 2A                 | -2.47  |
| Mir297a-2  | microRNA 297a-2                                        | -12.2  |
| Mir153     | microRNA 153                                           | 3.46   |
| Cox7a2l    | cytochrome c oxidase subunit VIIa polypeptide 2-like   | -2.84  |
| Gm22303    | predicted gene, 22303 [Source:MGI Symbol;Acc:MGI:      | -3.94  |
| Gm10263    | predicted gene 10263 [Source:MGI Symbol;Acc:MGI:3      | -3.82  |
| Rps8-ps4   | ribosomal protein S8, pseudogene 4 [Source:MGI Sym     | -6.63  |
|            |                                                        | -2.05  |
| Gm6382     | predicted gene 6382 [Source:MGI Symbol;Acc:MGI:36      | -2.28  |
| Gm7589     | predicted gene 7589                                    | -2.53  |
|            |                                                        | -5.31  |
| Mbnl2      | muscleblind-like 2                                     | -2.64  |
| Gm13162    | predicted pseudogene 13162 [Source:MGI Symbol;Acc      | -3.83  |
| Gm11951    | predicted gene 11951 [Source:MGI Symbol;Acc:MGI:3      | -4.09  |
| Gm13378    | predicted gene 13378 [Source:MGI Symbol;Acc:MGI:3      | -7.51  |



|                     |                                                           |        |
|---------------------|-----------------------------------------------------------|--------|
|                     |                                                           | -2.3   |
|                     |                                                           | -2.67  |
|                     |                                                           | -28.15 |
| Srp54b; Srp54a      | signal recognition particle 54B; signal recognition parti | -3.29  |
|                     |                                                           | -2.02  |
| Ighv7-1             | immunoglobulin heavy variable 7-1 [Source:MGI Sym         | 2.09   |
| Gm23622             | predicted gene, 23622 [Source:MGI Symbol;Acc:MGI:         | 2.23   |
| Gm5239              | predicted pseudogene 5239 [Source:MGI Symbol;Acc:         | -2.01  |
| Gm22501             | predicted gene, 22501 [Source:MGI Symbol;Acc:MGI:         | -2.39  |
| Shfm1               | split hand/foot malformation (ectrodactyly) type 1        | -3.21  |
| Gm20899; Gapdh-ps15 | predicted gene, 20899; glyceraldehyde-3-phosphate del     | -4.2   |
| Uqcrc2              | ubiquinol cytochrome c reductase core protein 2           | -2.59  |
| Gm10443             | predicted pseudogene 10443                                | -2.71  |
| Gm17538             | predicted gene, 17538 [Source:MGI Symbol;Acc:MGI:         | -3.17  |
| Tmem50a             | transmembrane protein 50A                                 | -5.17  |
|                     |                                                           | -12.82 |
|                     |                                                           | -12.82 |
| Tuba4a              | tubulin, alpha 4A                                         | -3.14  |
| Gm23700             | predicted gene, 23700 [Source:MGI Symbol;Acc:MGI:         | -2.03  |
| Mir669a-4           | microRNA 669a-4                                           | -2.09  |
| Mir669a-5           | microRNA 669a-5                                           | -2.09  |
| Mir669a-6           | microRNA 669a-6                                           | -2.09  |
| Mir669a-7           | microRNA 669a-7                                           | -2.09  |
| Mir669a-8           | microRNA 669a-8                                           | -2.09  |
| Mir669a-9           | microRNA 4669a-9                                          | -2.09  |
| Mir669a-10          | microRNA 669a-10                                          | -2.09  |
| Mir669a-11          | microRNA 669a-11                                          | -2.09  |
| Mir669a-12          | microRNA 669a-12                                          | -2.09  |
| Dync1h1             | dynein cytoplasmic 1 heavy chain 1                        | -2.75  |
| Ncam1               | neural cell adhesion molecule 1                           | -2.56  |
| LOC100862198        | PREDICTED: uncharacterized LOC100862198 (LOC              | -2.02  |
|                     |                                                           | -2.43  |
| Gm27341             | predicted gene, 27341 [Source:MGI Symbol;Acc:MGI:         | -4.43  |
|                     |                                                           | -2.59  |
| Gm24926             | predicted gene, 24926 [Source:MGI Symbol;Acc:MGI:         | -2.94  |
| Gm22632             | predicted gene, 22632 [Source:MGI Symbol;Acc:MGI:         | -2.94  |
| Adm                 | adrenomedullin                                            | -2.24  |
| Gm10182             | predicted pseudogene 10182 [Source:MGI Symbol;Acc         | -8.93  |
| Gm23989             | predicted gene, 23989 [Source:MGI Symbol;Acc:MGI:         | -2.96  |
| Gm8756              | predicted gene 8756 [Source:MGI Symbol;Acc:MGI:35         | -2.74  |
| Slc25a5             | solute carrier family 25 (mitochondrial carrier, adenine  | -2.2   |
| Gm13007             | predicted gene 13007 [Source:MGI Symbol;Acc:MGI:3         | -2.67  |
| Nell2               | NEL-like 2                                                | -2.19  |
| LOC100861725        | PREDICTED: uncharacterized LOC100861725 (LOC              | -3.69  |

|                  |                                                                               |        |
|------------------|-------------------------------------------------------------------------------|--------|
|                  |                                                                               | 2.82   |
| Gm22252          | predicted gene, 22252 [Source:MGI Symbol;Acc:MGI:36600]                       | -2.05  |
|                  |                                                                               | -5.14  |
| Gm10420          | predicted gene 10420                                                          | -3.97  |
| Atp1a3           | ATPase, Na <sup>+</sup> /K <sup>+</sup> transporting, alpha 3 polypeptide (At | -2.04  |
| Snora34; Mir1291 | small nucleolar RNA, H/ACA box 34; microRNA 1291                              | -9.51  |
| Gm5863           | predicted gene 5863 [Source:MGISymbol;Acc:MGI:36600]                          | -2.57  |
| Gm13363          | predicted gene 13363 [Source:MGISymbol;Acc:MGI:36600]                         | -10.25 |
| Gm14760          | predicted gene 14760                                                          | -4.77  |
| Pip4k2a          | phosphatidylinositol-5-phosphate 4-kinase, type II, alpha                     | -3.63  |
| Phpt1            | phosphohistidine phosphatase 1                                                | -2.32  |
| Olf1424          | olfactory receptor 1424                                                       | 2.06   |
|                  |                                                                               | -2.55  |
| Gdi1             | guanosine diphosphate (GDP) dissociation inhibitor 1                          | -2.39  |
|                  |                                                                               | -2.1   |
| Mir692-2         | microRNA 692-2                                                                | -9.57  |
| Dctn4            | dynactin 4                                                                    | -2.61  |
|                  |                                                                               | 2.01   |
| Snord42a         | small nucleolar RNA, C/D box 42A                                              | -7.19  |
| Gm27839          | predicted gene, 27839 [Source:MGI Symbol;Acc:MGI:36600]                       | -6.54  |
| Mir6386          | microRNA 6386                                                                 | 2.57   |
| Eif4g2           | eukaryotic translation initiation factor 4, gamma 2                           | -3.74  |
| Fkbp7            | FK506 binding protein 7                                                       | -2.18  |
| Csnk1a1          | casein kinase 1, alpha 1                                                      | -2.38  |
| Gpbp1            | GC-rich promoter binding protein 1                                            | -3.23  |
| Gm5582           | predicted gene 5582 [Source:MGISymbol;Acc:MGI:36600]                          | -9.48  |
| Gm22230          | predicted gene, 22230                                                         | -2.08  |
|                  |                                                                               | -2.1   |
| Odc1             | ornithine decarboxylase, structural 1                                         | -3.45  |
| Gm2026           | predicted gene 2026 [Source:MGISymbol;Acc:MGI:36600]                          | -4.35  |
| Gm9013           | predicted gene 9013 [Source:MGISymbol;Acc:MGI:36600]                          | -2.85  |
| Atp6v0e          | ATPase, H <sup>+</sup> transporting, lysosomal V0 subunit E                   | -3.06  |
| Gm11849          | predicted gene 11849 [Source:MGISymbol;Acc:MGI:36600]                         | -2.7   |
| Gm12372          | predicted gene 12372 [Source:MGISymbol;Acc:MGI:36600]                         | -4.83  |
| Gm24111          | predicted gene, 24111 [Source:MGI Symbol;Acc:MGI:36600]                       | 2.01   |
| Gm25759          | predicted gene, 25759 [Source:MGI Symbol;Acc:MGI:36600]                       | -2.59  |
|                  |                                                                               | 2.01   |
|                  |                                                                               | -2.04  |
| Gsk3b            | glycogen synthase kinase 3 beta                                               | -2.57  |
| Gm24689          | predicted gene, 24689 [Source:MGI Symbol;Acc:MGI:36600]                       | 2.02   |
| Slc7a11          | solute carrier family 7 (cationic amino acid transporter,                     | -4.5   |
| Ap3d1            | adaptor-related protein complex 3, delta 1 subunit                            | -2.08  |
| Gm26202          | predicted gene, 26202 [Source:MGI Symbol;Acc:MGI:36600]                       | -10.66 |
| Srp54b; Srp54c   | signal recognition particle 54B (Srp54b), mRNA.; sign                         | -3.02  |

|                   |                                                    |        |
|-------------------|----------------------------------------------------|--------|
|                   |                                                    | -5.36  |
|                   |                                                    | -4.3   |
| Gm9432            | predicted gene 9432 [Source:MGISymbol;Acc:MGI:36   | -2.27  |
|                   |                                                    | -4.95  |
| Rps13-ps4         | ribosomal protein S13, pseudogene 4                | -4.25  |
| Gm4575            | predicted gene 4575 [Source:MGISymbol;Acc:MGI:37   | -3.75  |
|                   |                                                    | -2.08  |
|                   |                                                    | 2      |
| Mir684-1; Gm13430 | microRNA 684-1 (Mir684-1), microRNA.; predicted g  | -12.92 |
|                   |                                                    | -3.41  |
| Rpl30-ps8         | ribosomal protein L30, pseudogene 8 [Source:MGI Sy | -4.74  |
|                   |                                                    | -2.44  |
| Gm4518            | predicted gene 4518 [Source:MGISymbol;Acc:MGI:37   | -2.89  |
| Gm23374           | predicted gene, 23374 [Source:MGI Symbol;Acc:MGI:  | -16.71 |
| Rps12-ps9         | ribosomal protein S12, pseudogene 9                | -5.56  |
|                   |                                                    | 2.14   |
|                   |                                                    | -2.81  |
|                   |                                                    | -2.43  |
| Gm19425           | PREDICTED: predicted gene, 19425 (Gm19425), mis    | -6.31  |
| Gm10053           | predicted gene 10053 [Source:MGISymbol;Acc:MGI:3   | -17.98 |
| Fam174a           | family with sequence similarity 174, member A      | -2.03  |
|                   |                                                    | 2.37   |
| Rpl38             | ribosomal protein L38                              | -3.7   |
| Gm23164           | predicted gene, 23164 [Source:MGI Symbol;Acc:MGI:  | -2.28  |
| Gm13413           | predicted gene 13413 [Source:MGISymbol;Acc:MGI:3   | -3.24  |
|                   |                                                    | -2.35  |
|                   |                                                    | -2.6   |
|                   |                                                    | 3.48   |
|                   |                                                    | 15.71  |
| Gm8355            | predicted pseudogene 8355 [Source:MGI Symbol;Acc:  | -9.17  |
| Mir684-1; Gm10241 | microRNA 684-1; predicted pseudogene 10241         | -23.22 |
| Fam168a           | family with sequence similarity 168, member A      | -2.18  |
| Gm14853           | predicted gene 14853 [Source:MGISymbol;Acc:MGI:3   | -4.4   |
| Rps19-ps4         | ribosomal protein S19, pseudogene 4                | -4.7   |
| Cadps             | Ca <sup>2+</sup> -dependent secretion activator    | -2.34  |
|                   |                                                    | -2.63  |
| Gm10145           | predicted gene 10145                               | -7.78  |
| Wdr47             | WD repeat domain 47                                | -2.06  |
|                   |                                                    | -8.1   |
| Rpl30-ps10        | ribosomal protein L30, pseudogene 10               | -4.41  |
| Gm27910           | predicted gene, 27910 [Source:MGI Symbol;Acc:MGI:  | -6.87  |
| Rpl9-ps6          | ribosomal protein L9, pseudogene 6 [Source:MGI Sym | -2.65  |
|                   |                                                    | -3.34  |
| Gm14305           | predicted gene 14305                               | -5.69  |

|                   |                                                                          |        |
|-------------------|--------------------------------------------------------------------------|--------|
| Rps19-ps8         | ribosomal protein S19, pseudogene 8                                      | -2.64  |
| Atp1b3            | ATPase, Na <sup>+</sup> /K <sup>+</sup> transporting, beta 3 polypeptide | -4.19  |
| Dirc2             | disrupted in renal carcinoma 2 (human)                                   | -2.45  |
| Gm26358           | predicted gene, 26358 [Source:MGI Symbol;Acc:MGI:]                       | 2.54   |
| Mrpl50            | mitochondrial ribosomal protein L50                                      | -2.81  |
|                   |                                                                          | -5.77  |
| Mir669b           | microRNA 669b                                                            | -4.63  |
|                   |                                                                          | -2.3   |
| Mir467c           | microRNA 467c                                                            | -2.87  |
| Gm23189           | predicted gene, 23189 [Source:MGI Symbol;Acc:MGI:]                       | -2.15  |
| Gm25708           | predicted gene, 25708 [Source:MGI Symbol;Acc:MGI:]                       | -2.15  |
| Gm25959           | predicted gene, 25959 [Source:MGI Symbol;Acc:MGI:]                       | -2.15  |
| Gm24332           | predicted gene, 24332 [Source:MGI Symbol;Acc:MGI:]                       | -2.15  |
| Gm23802           | predicted gene, 23802 [Source:MGI Symbol;Acc:MGI:]                       | -2.15  |
| Gm22903           | predicted gene, 22903 [Source:MGI Symbol;Acc:MGI:]                       | -2.15  |
| Gm25571           | predicted gene, 25571 [Source:MGI Symbol;Acc:MGI:]                       | -2.15  |
| Gm23049           | predicted gene, 23049 [Source:MGI Symbol;Acc:MGI:]                       | -2.15  |
| Gm24370           | predicted gene, 24370 [Source:MGI Symbol;Acc:MGI:]                       | -2.15  |
| Gm24159           | predicted gene, 24159 [Source:MGI Symbol;Acc:MGI:]                       | -2.15  |
| Gm25299           | predicted gene, 25299 [Source:MGI Symbol;Acc:MGI:]                       | -2.15  |
| Gm23798           | predicted gene, 23798 [Source:MGI Symbol;Acc:MGI:]                       | -2.15  |
| Gm25070           | predicted gene, 25070 [Source:MGI Symbol;Acc:MGI:]                       | -2.15  |
| Gm22475           | predicted gene, 22475 [Source:MGI Symbol;Acc:MGI:]                       | -2.15  |
| Gm23400           | predicted gene, 23400 [Source:MGI Symbol;Acc:MGI:]                       | -2.15  |
| Gm27038           | predicted gene, 27038 [Source:MGI Symbol;Acc:MGI:]                       | -2.45  |
| Cox8a             | cytochrome c oxidase subunit VIIa                                        | -5.47  |
| Gm2574            | predicted pseudogene 2574                                                | -3.8   |
| Lrrc58            | leucine rich repeat containing 58                                        | -2.61  |
| Gm12587           | predicted gene 12587 [Source:MGI Symbol;Acc:MGI:]                        | -2.63  |
| Mir7063           | microRNA 7063                                                            | 2.99   |
| Cox5a             | cytochrome c oxidase subunit Va                                          | -4.79  |
| Mir6916           | microRNA 6916                                                            | 2.06   |
| Gm14017           | predicted gene 14017 [Source:MGI Symbol;Acc:MGI:]                        | -3.25  |
| Atp5l-ps2         | ATP synthase, H <sup>+</sup> transporting, mitochondrial F0 comp         | -2.97  |
| Scarna13; Mir3069 | small Cajal body-specific RNA 1; microRNA 3069; mi                       | -2.33  |
| Sdpr              | serum deprivation response                                               | -2.25  |
| Gm6517            | predicted gene 6517 [Source:MGI Symbol;Acc:MGI:]                         | -3.51  |
| Polr2k            | polymerase (RNA) II (DNA directed) polypeptide K                         | -2.48  |
|                   |                                                                          | -2.51  |
| Tpt1-ps5          | tumor protein, translationally-controlled, pseudogene 5                  | -2.49  |
| Gm8783            | predicted pseudogene 8783 [Source:MGI Symbol;Acc:]                       | -13.55 |
| Gm15801           | predicted gene 15801 [Source:MGI Symbol;Acc:MGI:]                        | -13.55 |
| Sacm11            | SAC1 (suppressor of actin mutations 1, homolog)-like                     | -2.04  |
|                   |                                                                          | -5.88  |

|                      |                                                       |        |
|----------------------|-------------------------------------------------------|--------|
| Gm2962               | predicted pseudogene 2962 [Source:MGI Symbol;Acc:     | -34.01 |
| Spes2                | signal peptidase complex subunit 2 homolog (S. cerevi | -3.85  |
| Gm12912              | predicted gene 12912 [Source:MGISymbol;Acc:MGI:3      | -2.08  |
| Rpl38-ps1            | ribosomal protein L38, pseudogene 1                   | -7.63  |
| Gm16354              | predicted gene 16354 [Source:MGISymbol;Acc:MGI:3      | -4.89  |
| Gm12529              | predicted gene 12529 [Source:MGISymbol;Acc:MGI:3      | -2.64  |
| Gm14989              | predicted gene 14989                                  | -2.35  |
|                      |                                                       | 2.25   |
|                      |                                                       | -38.84 |
| Rplp1-ps1            | ribosomal protein, large, P1, pseudogene 1            | -2.92  |
| Gm24541              | predicted gene, 24541 [Source:MGI Symbol;Acc:MGI:     | 2.59   |
| Gm21961              | predicted gene, 21961 [Source:MGI Symbol;Acc:MGI:     | -2.16  |
| Gm14414              | predicted gene 14414 [Source:MGISymbol;Acc:MGI:3      | -9.28  |
| Gm7618               | predicted pseudogene 7618 [Source:MGI Symbol;Acc:     | -3.05  |
|                      |                                                       | -3.53  |
| Elf1                 | E74-like factor 1; E74-like factor 1 (Elf1), mRNA.    | -2.49  |
|                      |                                                       | -2.55  |
| Glns-ps1             | glutamine synthetase pseudogene 1                     | -4.93  |
| Gm16470              | predicted pseudogene 16470 [Source:MGI Symbol;Acc     | -2.91  |
| Aplp2                | amyloid beta (A4) precursor-like protein 2            | -2.13  |
| Smap2                | small ArfGAP 2                                        | -3.19  |
| Immp11               | IMP1 inner mitochondrial membrane peptidase-like (S.  | -5.72  |
| Mef2a                | myocyte enhancer factor 2A                            | -3.65  |
| Grm3                 | glutamate receptor, metabotropic 3                    | -3.4   |
|                      |                                                       | -2.62  |
| Gm25224              | predicted gene, 25224 [Source:MGI Symbol;Acc:MGI:     | 3.56   |
| Gm7887               | predicted gene 7887 [Source:MGISymbol;Acc:MGI:36      | -3.76  |
|                      |                                                       | -3.09  |
| Smt3h2-ps4           | SMT3 suppressor of mif two 3 homolog 2, pseudogene    | -22.7  |
|                      |                                                       | -8.52  |
| Gm14148              | predicted gene 14148 [Source:MGISymbol;Acc:MGI:3      | -3.16  |
| Gm15198              | predicted gene 15198 [Source:MGISymbol;Acc:MGI:3      | -9.35  |
| Mir1912              | microRNA 1912                                         | -23.61 |
| Gm9753               | PREDICTED: predicted gene 9753 (Gm9753), miscR        | 2.43   |
| Sfxn1                | sideroflexin 1                                        | -3.16  |
|                      |                                                       | -3.2   |
| 1810022K09Rik        | RIKEN cDNA 1810022K09 gene                            | -2.43  |
| Gm4660               | predicted gene 4660 [Source:MGISymbol;Acc:MGI:37      | -2.52  |
|                      |                                                       | 10.35  |
|                      |                                                       | 10.35  |
|                      |                                                       | 10.35  |
|                      |                                                       | 10.35  |
|                      |                                                       | 10.35  |
| 820431F20Rik; Gm2109 | RIKEN cDNA 6820431F20 gene, mRNA (cDNA clone          | -2.2   |

|                      |                                                          |        |
|----------------------|----------------------------------------------------------|--------|
| Nutf2-ps2; Nutf2-ps1 | nuclear transport factor 2, pseudogene 2; nuclear transp | -11.56 |
| Gm12469              | predicted gene 12469 [Source:MGI Symbol;Acc:MGI:5        | -4.39  |
|                      |                                                          | -2.42  |
|                      |                                                          | -2.78  |
| Gm6316; EG622339     | predicted pseudogene 6316 [Source:MGI Symbol;Acc:        | -3.42  |
| Rps16-ps2            | ribosomal protein S16, pseudogene 2                      | -12.29 |
| Snord17              | small nucleolar RNA, C/D box 17                          | -2.02  |
| Gm13352              | predicted gene 13352                                     | -4.95  |
| Gm13728              | predicted gene 13728 [Source:MGI Symbol;Acc:MGI:5        | 2.08   |
| Mapk1ip11            | mitogen-activated protein kinase 1 interacting protein 1 | -2.26  |
| Sf3b1                | splicing factor 3b, subunit 1                            | -2.19  |
| Gm13921              | predicted gene 13921 [Source:MGI Symbol;Acc:MGI:5        | -2.08  |
|                      |                                                          | -2.02  |
| Ranbp9               | RAN binding protein 9                                    | -3.92  |

**Table S7: Differentially expressed genes with a significant interaction of diet and inhibitor.**

| <b>Gene Symbol</b>  | <b>LGD<br/>average<br/>intensity<br/>(log2)</b> | <b>LGD+sEHI<br/>average<br/>intensity<br/>(log2)</b> | <b>HGD<br/>average<br/>intensity<br/>(log2)</b> | <b>HGD+sEHI<br/>average<br/>intensity<br/>(log2)</b> | <b>Delta<br/>Fold<br/>Change</b> |
|---------------------|-------------------------------------------------|------------------------------------------------------|-------------------------------------------------|------------------------------------------------------|----------------------------------|
| Gm24357             | 5.45                                            | 10.08                                                | 7.45                                            | 4.1                                                  | -251.56                          |
| Gm27529             | 9.53                                            | 11.81                                                | 12.6                                            | 7.52                                                 | -164.38                          |
| Gm22631             | 10.14                                           | 11.65                                                | 12.58                                           | 7.59                                                 | -90.4                            |
| Gm27684             | 5.15                                            | 7.61                                                 | 7.77                                            | 3.86                                                 | -82.02                           |
| Gm22289             | 6.76                                            | 7.88                                                 | 10.27                                           | 5.07                                                 | -79.42                           |
| Gm11450             | 7.07                                            | 8.54                                                 | 10.54                                           | 5.81                                                 | -73.28                           |
| Rpl18-ps1           | 11.17                                           | 12.07                                                | 15.29                                           | 10.11                                                | -67.96                           |
| Rpl19-ps11          | 7.58                                            | 9.7                                                  | 10.78                                           | 6.87                                                 | -64.81                           |
| Gm25074             | 10.06                                           | 11.49                                                | 12.12                                           | 7.61                                                 | -61.18                           |
| Gm16409             | 11.38                                           | 11.48                                                | 14.48                                           | 8.67                                                 | -60.23                           |
| Gm8172              | 11.66                                           | 12.02                                                | 14.29                                           | 8.89                                                 | -54.17                           |
| Rps6-ps1            | 8.92                                            | 9.76                                                 | 11.55                                           | 6.66                                                 | -53.1                            |
| Gm22759;<br>Gm14251 | 14.1                                            | 16.78                                                | 17.81                                           | 14.79                                                | -52.05                           |
| Gm8203              | 8.2                                             | 9.02                                                 | 12.01                                           | 7.15                                                 | -51.16                           |
| Gm22188             | 10.31                                           | 11.64                                                | 11.85                                           | 7.51                                                 | -50.88                           |
| Gm23089             | 10.42                                           | 11.24                                                | 11.67                                           | 6.83                                                 | -50.73                           |
| Gm24711             | 10.42                                           | 11.24                                                | 11.67                                           | 6.83                                                 | -50.73                           |
| Gm26188             | 10.42                                           | 11.24                                                | 11.67                                           | 6.83                                                 | -50.73                           |
| Gm5558              | 10.25                                           | 10.64                                                | 12.69                                           | 7.42                                                 | -50.59                           |
| Gm23313             | 9.71                                            | 10.11                                                | 11.26                                           | 6.07                                                 | -48.12                           |
| Gm23446             | 9.71                                            | 10.11                                                | 11.26                                           | 6.07                                                 | -48.12                           |
| Gm26502             | 9.71                                            | 10.11                                                | 11.26                                           | 6.07                                                 | -48.12                           |
| Gm27626             | 12.04                                           | 11.89                                                | 15.49                                           | 9.77                                                 | -47.13                           |
| Gm22851             | 8.33                                            | 9.19                                                 | 10.49                                           | 5.8                                                  | -46.98                           |
| Gm22760;<br>Gm12318 | 11.23                                           | 14                                                   | 15.07                                           | 12.3                                                 | -46.32                           |
| Gm23862             | 10.36                                           | 11.49                                                | 12.21                                           | 7.81                                                 | -46.28                           |
| Gm22110             | 10.77                                           | 11.77                                                | 12.06                                           | 7.59                                                 | -44.59                           |
| Gm22128             | 10.77                                           | 11.77                                                | 12.06                                           | 7.59                                                 | -44.59                           |
| Gm22812             | 10.77                                           | 11.77                                                | 12.06                                           | 7.59                                                 | -44.59                           |
| Gm23357             | 10.77                                           | 11.77                                                | 12.06                                           | 7.59                                                 | -44.59                           |
| Gm23359             | 10.77                                           | 11.77                                                | 12.06                                           | 7.59                                                 | -44.59                           |
| Gm23524             | 10.77                                           | 11.77                                                | 12.06                                           | 7.59                                                 | -44.59                           |
| Gm23549             | 10.77                                           | 11.77                                                | 12.06                                           | 7.59                                                 | -44.59                           |
| Gm23696             | 10.77                                           | 11.77                                                | 12.06                                           | 7.59                                                 | -44.59                           |
| Gm23724             | 10.77                                           | 11.77                                                | 12.06                                           | 7.59                                                 | -44.59                           |
| Gm24658             | 10.77                                           | 11.77                                                | 12.06                                           | 7.59                                                 | -44.59                           |
| Gm24742             | 10.77                                           | 11.77                                                | 12.06                                           | 7.59                                                 | -44.59                           |

|                                 |       |       |       |       |        |
|---------------------------------|-------|-------|-------|-------|--------|
| Gm25350                         | 10.77 | 11.77 | 12.06 | 7.59  | -44.59 |
| Gm25597                         | 10.77 | 11.77 | 12.06 | 7.59  | -44.59 |
| Gm26094                         | 10.77 | 11.77 | 12.06 | 7.59  | -44.59 |
| Gm26136                         | 10.77 | 11.77 | 12.06 | 7.59  | -44.59 |
| Gm26201                         | 10.77 | 11.77 | 12.06 | 7.59  | -44.59 |
| Gm26223                         | 10.77 | 11.77 | 12.06 | 7.59  | -44.59 |
| Gm26246                         | 10.77 | 11.77 | 12.06 | 7.59  | -44.59 |
| Gm26433                         | 10.77 | 11.77 | 12.06 | 7.59  | -44.59 |
| Gm22046                         | 10.75 | 11.76 | 12.03 | 7.58  | -44.11 |
| Gm25210                         | 10.75 | 11.76 | 12.03 | 7.58  | -44.11 |
| Gm25471                         | 10.75 | 11.76 | 12.03 | 7.58  | -44.11 |
| Gm26032                         | 10.75 | 11.76 | 12.03 | 7.58  | -44.11 |
| Gm22426                         | 9.97  | 12.07 | 13.95 | 10.6  | -43.64 |
| Apod                            | 9.4   | 9.44  | 12.21 | 6.82  | -43.06 |
| Rpl19-ps1                       | 7.68  | 9.45  | 10.54 | 7.18  | -34.98 |
| Gm22131                         | 6.39  | 7.76  | 7.97  | 4.24  | -34.55 |
| Mir682                          | 14.49 | 16.48 | 17.7  | 14.58 | -34.34 |
| Gm25247                         | 16.65 | 17.63 | 19.22 | 15.1  | -34.28 |
| Gm22584                         | 10.51 | 11.22 | 11.12 | 6.74  | -33.97 |
| Gm17571                         | 15.24 | 15.42 | 17.61 | 12.71 | -33.88 |
| Rps24-ps3                       | 10.41 | 11.18 | 13.55 | 9.32  | -31.99 |
| Gm13680                         | 6.97  | 8.15  | 10.55 | 6.74  | -31.84 |
|                                 | 7.94  | 9.83  | 11.34 | 8.24  | -31.76 |
| Gm23154                         | 11.5  | 12.1  | 13.9  | 9.53  | -31.16 |
| Gm24264                         | 9.6   | 10.49 | 11.04 | 6.97  | -31.05 |
| Gm1821                          | 12.81 | 13.54 | 16.58 | 12.36 | -30.84 |
|                                 | 9.64  | 9.27  | 11.7  | 6.38  | -30.81 |
| Uck2                            | 4.94  | 7.96  | 7.04  | 5.17  | -29.5  |
| Gm23767                         | 8.91  | 9.69  | 9.69  | 5.62  | -28.56 |
| Gm2546                          | 13.8  | 16.25 | 15.52 | 13.18 | -27.72 |
| Snord14e                        | 3.33  | 4.03  | 7.38  | 3.29  | -27.63 |
| Gm20302;<br>Gm22758;<br>Gm14173 | 13.57 | 15.09 | 16.86 | 13.6  | -27.5  |
| Rpl18a-ps1                      | 10.3  | 11.11 | 13.38 | 9.45  | -26.76 |
| Gm10157                         | 5.24  | 6.83  | 8.31  | 5.15  | -26.72 |
| Gm15427                         | 14.03 | 12.81 | 17.49 | 11.59 | -25.65 |
| Gm15621                         | 12.74 | 12.35 | 14.43 | 9.42  | -24.6  |
| Hsbp1                           | 7.68  | 10.93 | 10.52 | 9.16  | -24.25 |
| Rab7                            | 9.29  | 9.65  | 11.97 | 7.73  | -24.22 |
| Mir1191                         | 16.71 | 16.49 | 18.2  | 13.39 | -24.1  |
| Gm25188                         | 3.59  | 4.52  | 7.06  | 3.46  | -23.32 |
| Rps4x                           | 6.08  | 7.66  | 9.43  | 6.47  | -23.27 |
|                                 | 8.57  | 11.32 | 12.04 | 10.32 | -22.27 |



|                     |       |       |       |       |        |
|---------------------|-------|-------|-------|-------|--------|
| Vdac3               | 6     | 7.48  | 9.04  | 6.06  | -21.91 |
| Cox7a2              | 10.45 | 10.89 | 14.11 | 10.12 | -21.64 |
| Gm22610             | 11.11 | 11    | 13.69 | 9.15  | -21.52 |
|                     | 7.37  | 8.96  | 10.6  | 7.78  | -21.32 |
| Gm12755             | 7.06  | 7.78  | 9.4   | 5.78  | -20.25 |
|                     | 4.18  | 5.02  | 7.59  | 4.11  | -20.03 |
| Higd2a              | 5.22  | 7.38  | 8.84  | 6.68  | -20    |
| Rpl4                | 10.34 | 10.83 | 14.16 | 10.33 | -19.98 |
| Gm6136              | 11.22 | 12.72 | 14.15 | 11.34 | -19.88 |
| H2afz               | 7.67  | 7.92  | 10.63 | 6.61  | -19.28 |
| Gm25594             | 6.21  | 8.03  | 8.96  | 6.56  | -18.82 |
| Mir6989             | 7.9   | 7.78  | 9.11  | 4.82  | -17.95 |
| Gm22757;<br>Gm13875 | 10.47 | 12.82 | 13.18 | 11.38 | -17.79 |
| Rps6-ps3            | 11.63 | 11.31 | 13.01 | 8.58  | -17.34 |
| Eif1-ps1            | 6.12  | 6.82  | 8.79  | 5.37  | -17.31 |
| Gm22358             | 3.77  | 4.58  | 6.66  | 3.36  | -17.19 |
| Gm15720             | 12.49 | 12.44 | 12.95 | 8.82  | -16.86 |
| Gm11971             | 9.56  | 10.42 | 11.89 | 8.69  | -16.75 |
| Rpl8                | 8.7   | 9.64  | 11.32 | 8.2   | -16.64 |
|                     | 3.87  | 7.06  | 5.31  | 4.45  | -16.63 |
| Gm25911             | 15.81 | 10.95 | 17.92 | 9.04  | -16.19 |
|                     | 13.67 | 14.87 | 16.9  | 14.09 | -16.12 |
| Gm2389              | 5.44  | 6.36  | 7.28  | 4.24  | -15.59 |
| Hist1h2an           | 4.86  | 6.02  | 7.7   | 4.91  | -15.46 |
| Gm12328             | 9.99  | 10.77 | 12.68 | 9.54  | -15.14 |
| Gm4613              | 12.3  | 13.41 | 15.09 | 12.27 | -15.13 |
| Rpl38-ps1           | 10.09 | 11.07 | 12.22 | 9.29  | -15.1  |
| Gm27935             | 5.87  | 7.19  | 7.35  | 4.79  | -14.73 |
| Gm24400             | 4.3   | 4.02  | 8.58  | 4.43  | -14.69 |
| Gm4575              | 9.03  | 10.99 | 10.39 | 8.48  | -14.58 |
| Gm1840              | 8.24  | 8.5   | 10.04 | 6.44  | -14.4  |
| Gm19496             | 5.64  | 6.82  | 8.06  | 5.4   | -14.29 |
| Gm22582             | 7.08  | 8.34  | 10.16 | 7.59  | -14.25 |
| Gm6341              | 6.98  | 7.46  | 9.28  | 5.94  | -14.14 |
| Gm22863             | 8.69  | 9.59  | 9.49  | 6.6   | -13.91 |
| Gm23953             | 8.69  | 9.59  | 9.49  | 6.6   | -13.91 |
| Gm24618             | 8.69  | 9.59  | 9.49  | 6.6   | -13.91 |
| Gm26332             | 8.69  | 9.59  | 9.49  | 6.6   | -13.91 |
| Gm2308              | 10.28 | 12.27 | 11.45 | 9.65  | -13.74 |
| Gm22776             | 8.5   | 8.62  | 9.54  | 5.9   | -13.58 |
| Gm5138              | 12.2  | 13.67 | 13.17 | 10.88 | -13.57 |
| Ndufa2              | 8.42  | 8.44  | 12.33 | 8.61  | -13.4  |
| Gm25615             | 9.03  | 9.49  | 9.86  | 6.6   | -13.2  |

|               |       |       |       |       |        |
|---------------|-------|-------|-------|-------|--------|
| Gm10959       | 7.33  | 8.9   | 8.59  | 6.46  | -13.06 |
| Gm9081        | 6.71  | 8.54  | 8.12  | 6.25  | -13.05 |
| Gm22047       | 9.61  | 10.48 | 10.17 | 7.35  | -12.98 |
| Gm23619       | 9.61  | 10.48 | 10.17 | 7.35  | -12.98 |
| Gm25474       | 9.61  | 10.48 | 10.17 | 7.35  | -12.98 |
| Gm10327       | 10.88 | 13.11 | 12.16 | 10.7  | -12.9  |
| Slc6a20a      | 6.9   | 8.3   | 8.07  | 5.8   | -12.73 |
| Scd2; Mir5114 | 7.28  | 8.44  | 9.4   | 6.88  | -12.73 |
| Gm12286       | 11.11 | 12.79 | 12.09 | 10.12 | -12.57 |
| Gm8349        | 10.2  | 12.42 | 11.42 | 10    | -12.56 |
| Vps28         | 5.46  | 7.07  | 7.57  | 5.53  | -12.51 |
| Gm12231       | 6.5   | 6.84  | 9.32  | 6.01  | -12.49 |
| Rpl27-ps1     | 7.74  | 8.04  | 9.77  | 6.45  | -12.24 |
| Ubb; Gm1821   | 11.24 | 11.87 | 13.45 | 10.46 | -12.22 |
|               | 5.31  | 6.24  | 8.06  | 5.4   | -12.15 |
| Hsp90ab1      | 9.97  | 10.97 | 11.28 | 8.68  | -12.11 |
| Gm10171       | 6.46  | 7.45  | 8.78  | 6.18  | -12.05 |
| Gm5514        | 11.97 | 12.11 | 13.85 | 10.4  | -12.04 |
| Gm25944       | 8.58  | 9.36  | 9.68  | 6.88  | -11.99 |
| Gm16470       | 10.99 | 13.03 | 12.39 | 10.85 | -11.97 |
| Gm22548       | 14.18 | 16.44 | 14.86 | 13.56 | -11.83 |
| Gm7381        | 5.4   | 5.5   | 8.51  | 5.08  | -11.59 |
| Rpl37a        | 10.76 | 11.79 | 13.25 | 10.75 | -11.57 |
| Gm11263       | 8.67  | 8.56  | 10.47 | 6.83  | -11.56 |
|               | 9.62  | 11.12 | 11.56 | 9.54  | -11.49 |
| Gapdh-ps14    | 9.1   | 11.25 | 10.27 | 8.9   | -11.47 |
| Ndufb9        | 6.54  | 7.52  | 8.21  | 5.68  | -11.44 |
| Vkorc1        | 4.54  | 5.27  | 7.7   | 4.92  | -11.34 |
| Gm16209       | 5.21  | 6.43  | 7.32  | 5.03  | -11.33 |
| Gm12537       | 14.53 | 16.72 | 15.83 | 14.54 | -11.21 |
| Gm17383       | 6.79  | 7.1   | 10.29 | 7.13  | -11.13 |
| Gm3200        | 8.5   | 10.18 | 9.61  | 7.83  | -11.05 |
|               | 4.69  | 4.35  | 8.01  | 4.2   | -11.03 |
| Hist1h2aj     | 4.75  | 5.62  | 7.54  | 4.95  | -10.97 |
| Gm23728       | 10.3  | 9.99  | 12.72 | 8.97  | -10.93 |
| Gm12669       | 10.12 | 11.69 | 11.99 | 10.13 | -10.78 |
| Gm2445        | 9.57  | 11.26 | 10.67 | 8.95  | -10.68 |
| Gm17541       | 9.91  | 10.5  | 12.5  | 9.67  | -10.68 |
| D8ErtD738e    | 6.67  | 6.51  | 8     | 4.43  | -10.6  |
| Ndufb11       | 5.41  | 6.28  | 7.78  | 5.26  | -10.55 |
| Txn1l         | 6.19  | 7.1   | 7.45  | 4.97  | -10.46 |
| Gm19774       | 7.76  | 6.11  | 10.19 | 5.15  | -10.46 |
| Gm6065        | 7.53  | 7.2   | 9.13  | 5.44  | -10.2  |
| Gm3222        | 11.68 | 13.52 | 12.81 | 11.29 | -10.19 |

|                           |       |       |       |       |        |
|---------------------------|-------|-------|-------|-------|--------|
|                           | 4.24  | 4.81  | 6.87  | 4.1   | -10.17 |
| Smdt1                     | 6.03  | 6.22  | 8.18  | 5.04  | -10.1  |
| Glns-ps1                  | 9.81  | 10.84 | 11.43 | 9.13  | -10.03 |
|                           | 9.01  | 9.41  | 11.7  | 8.79  | -9.9   |
| Gm10108                   | 9.13  | 9.44  | 11.05 | 8.07  | -9.79  |
| Rpl19-ps4;<br>Gm27506     | 4.77  | 5.66  | 6.56  | 4.16  | -9.76  |
| Gm6316;<br>EG622339       | 8.32  | 9.83  | 9.35  | 7.58  | -9.75  |
| Uqcrq                     | 6.71  | 7.51  | 8.42  | 5.93  | -9.74  |
| Dcn                       | 4.55  | 4.96  | 7.19  | 4.35  | -9.57  |
| Rpl18a                    | 10.71 | 10.97 | 12.78 | 9.78  | -9.57  |
|                           | 4.58  | 5.84  | 6.73  | 4.73  | -9.53  |
|                           | 4.47  | 7.08  | 4.82  | 4.2   | -9.46  |
| Gm7286                    | 7.17  | 9.04  | 8.8   | 7.43  | -9.44  |
| Ndufa13                   | 7.25  | 7.73  | 9.74  | 6.98  | -9.42  |
| Rpl221l                   | 4.98  | 5.45  | 7.86  | 5.1   | -9.42  |
| Gm10359                   | 14.67 | 16.63 | 15.9  | 14.65 | -9.28  |
| Eef2                      | 6.79  | 7.97  | 8.55  | 6.53  | -9.15  |
| LOC100861862              | 4.2   | 5.78  | 5.86  | 4.25  | -9.15  |
| Epas1                     | 8.23  | 8.86  | 10.14 | 7.58  | -9.09  |
| Mir3097                   | 6.11  | 8.19  | 7.52  | 6.42  | -9.09  |
| Gm3534                    | 9.35  | 11.52 | 10.58 | 9.58  | -9.02  |
| Gm24518                   | 5.68  | 5.73  | 7.35  | 4.24  | -8.95  |
| Gm13292                   | 14.28 | 16.05 | 15.35 | 13.95 | -8.94  |
|                           | 11.64 | 13.53 | 13.46 | 12.19 | -8.91  |
| Selt                      | 6.87  | 8.28  | 8.01  | 6.28  | -8.84  |
| Gm16378                   | 4.74  | 5.96  | 7.19  | 5.31  | -8.61  |
| Gm22860                   | 17.88 | 19    | 19.12 | 17.14 | -8.59  |
| Gm10273                   | 8.23  | 8.93  | 10.34 | 7.94  | -8.57  |
| Hist1h2af                 | 5.19  | 5.92  | 7.13  | 4.76  | -8.56  |
| Gpm6a                     | 9.31  | 11.06 | 11.39 | 10.05 | -8.55  |
| Gm17068                   | 8.16  | 9.53  | 9.44  | 7.72  | -8.53  |
| Gm4691; RP24-<br>363O21.2 | 10.57 | 11.53 | 11.22 | 9.08  | -8.5   |
| Gm11518                   | 7.15  | 6.5   | 8.02  | 4.3   | -8.44  |
| Kif5a                     | 6.88  | 7.83  | 8.64  | 6.52  | -8.41  |
| Gm24187                   | 19.22 | 13.79 | 19.75 | 11.26 | -8.38  |
| Rpl10a-ps1                | 10.04 | 10.18 | 11.96 | 9.03  | -8.32  |
| Gm13772                   | 8.56  | 8.78  | 10.24 | 7.42  | -8.25  |
| Ndr2                      | 13.5  | 13.92 | 15.06 | 12.44 | -8.23  |
| Fam107a                   | 10.86 | 11.97 | 12.2  | 10.26 | -8.2   |
| Gm10291                   | 9.52  | 11.31 | 10.55 | 9.3   | -8.2   |
| Hba-a2; Hba-a1            | 9.55  | 9.25  | 10.9  | 7.57  | -8.17  |

|                          |       |       |       |       |       |
|--------------------------|-------|-------|-------|-------|-------|
| Gm12254                  | 7.09  | 7.27  | 8.95  | 6.09  | -8.15 |
| Gm26300;<br>Gm11285      | 8.33  | 9.58  | 10.59 | 8.82  | -8.13 |
| Gm10233                  | 8.64  | 9.89  | 11.18 | 9.41  | -8.11 |
| Gm14292                  | 6.23  | 5.76  | 9.01  | 5.53  | -8.06 |
| Gm6517                   | 5.84  | 7.04  | 7.56  | 5.75  | -8.04 |
|                          | 4.75  | 6.37  | 5.74  | 4.36  | -8    |
| Gm5559                   | 12.81 | 14.19 | 13.82 | 12.2  | -7.99 |
| Rpl3                     | 9.42  | 9.14  | 12.03 | 8.78  | -7.83 |
| Gm4609                   | 14.5  | 16.1  | 15.63 | 14.26 | -7.82 |
| Gm12419                  | 6.43  | 8.21  | 7.45  | 6.27  | -7.82 |
| LOC100861833             | 6.7   | 6.94  | 8.02  | 5.3   | -7.82 |
| Grina                    | 6.27  | 7.02  | 8.63  | 6.43  | -7.72 |
| Gm27459                  | 9.57  | 9.82  | 10.73 | 8.04  | -7.66 |
| Gm2606                   | 12.45 | 13.22 | 13.36 | 11.19 | -7.64 |
|                          | 6.67  | 8.45  | 8.03  | 6.88  | -7.63 |
| Rpl29; Gm8210            | 6.65  | 6.8   | 7.73  | 4.96  | -7.62 |
| Cd81                     | 6.9   | 7.48  | 8.96  | 6.62  | -7.58 |
| Gm6293                   | 4.36  | 5.43  | 6.08  | 4.22  | -7.57 |
| Gm13394                  | 10.07 | 10.3  | 10.43 | 7.75  | -7.56 |
| Fads2                    | 5.65  | 6.63  | 6.9   | 4.96  | -7.55 |
| Gm8756                   | 9.11  | 10.57 | 9.8   | 8.35  | -7.54 |
| Gm6767                   | 7.7   | 8.24  | 9.16  | 6.79  | -7.52 |
|                          | 10.19 | 10.74 | 10.93 | 8.62  | -7.31 |
| Sepw1                    | 6.5   | 7.72  | 8.18  | 6.54  | -7.26 |
| Gm24245                  | 19.29 | 13.95 | 19.93 | 11.72 | -7.26 |
| Gm24270                  | 19.29 | 13.95 | 19.93 | 11.72 | -7.26 |
| Gm5863                   | 9.22  | 10.71 | 10.34 | 8.97  | -7.22 |
| Hba-a2; Hba-a1           | 11.24 | 9.91  | 12.83 | 8.66  | -7.2  |
| Papd4                    | 4.69  | 5.85  | 6.28  | 4.6   | -7.17 |
| Gm11478                  | 12.17 | 11.78 | 14.49 | 11.26 | -7.17 |
| Gm7363                   | 7.04  | 7.31  | 9.11  | 6.54  | -7.16 |
| Rpl19                    | 5.52  | 6.39  | 6.96  | 4.99  | -7.15 |
| Rpl27-ps2                | 5.03  | 4.93  | 7.02  | 4.08  | -7.15 |
| Gm7664                   | 4.05  | 5.95  | 5.4   | 4.47  | -7.13 |
| Cox8a                    | 9.4   | 9.78  | 11.02 | 8.57  | -7.11 |
| Gm25241                  | 6.3   | 7.01  | 7.93  | 5.81  | -7.1  |
| Eif3s6-ps1               | 7.39  | 6.74  | 8.3   | 4.84  | -7.06 |
| Gm13841; Rpl29           | 6.75  | 6.76  | 8.11  | 5.32  | -7.01 |
| Actb                     | 8.98  | 9.41  | 10.37 | 7.99  | -6.99 |
| Gm17081;<br>LOC100862237 | 9.18  | 10.04 | 10.92 | 8.98  | -6.99 |
| Gm23019                  | 14.18 | 13.62 | 15.59 | 12.23 | -6.97 |
|                          | 9.98  | 12.01 | 11.88 | 11.12 | -6.93 |

|              |       |       |       |       |       |
|--------------|-------|-------|-------|-------|-------|
| Rpl19-ps12   | 6.05  | 6.87  | 7.75  | 5.78  | -6.93 |
| LOC100861642 | 8.11  | 7.97  | 10.19 | 7.26  | -6.89 |
| Rnaset2b     | 5.32  | 5.83  | 7.2   | 4.93  | -6.87 |
| Gm10254      | 8.86  | 10.55 | 10.09 | 9.01  | -6.8  |
| Gm7336       | 12.32 | 12.86 | 13.06 | 10.84 | -6.79 |
| Gm14387      | 7.12  | 7.64  | 8.34  | 6.1   | -6.76 |
| Gm6747       | 7.67  | 7.11  | 9.18  | 5.88  | -6.72 |
| Rpl31-ps14   | 18.63 | 18.6  | 18.65 | 15.88 | -6.7  |
| Sod1         | 8.76  | 8.72  | 10.32 | 7.54  | -6.67 |
| Gm14111      | 10.94 | 12.19 | 12.1  | 10.61 | -6.67 |
|              | 4.82  | 5.73  | 6.54  | 4.72  | -6.66 |
| Gm13433      | 5.5   | 5.71  | 7.97  | 5.44  | -6.66 |
| Gm7618       | 8.85  | 9.97  | 10.01 | 8.4   | -6.65 |
| Pias1        | 5.52  | 5.72  | 7.3   | 4.77  | -6.64 |
| Gm23388      | 16.8  | 13.52 | 17    | 10.99 | -6.64 |
| Gm10243      | 8.64  | 8.01  | 10.64 | 7.28  | -6.63 |
| LOC100862257 | 5.06  | 5.82  | 6.43  | 4.46  | -6.58 |
|              | 5.92  | 6.93  | 8.12  | 6.43  | -6.54 |
| Rpsa-ps12    | 5.28  | 6.8   | 7.04  | 5.86  | -6.5  |
| Gm8648       | 7.27  | 7.42  | 9.61  | 7.06  | -6.46 |
| Gm23566      | 14.41 | 14.24 | 15.54 | 12.67 | -6.46 |
| Gm6428       | 5.93  | 6.79  | 7.81  | 6     | -6.43 |
|              | 3.52  | 3.57  | 6.16  | 3.54  | -6.4  |
| Gm7251       | 9.42  | 10.87 | 9.93  | 8.7   | -6.38 |
| Gm11185      | 8.48  | 10.36 | 9.6   | 8.82  | -6.32 |
| Gm26365      | 7.29  | 8.1   | 8.18  | 6.33  | -6.31 |
| Canx         | 9.86  | 10.38 | 11.01 | 8.88  | -6.25 |
|              | 15.63 | 16.23 | 16.47 | 14.43 | -6.23 |
| Gm11675      | 5.71  | 6.08  | 7.41  | 5.15  | -6.2  |
| Tspan31      | 6.97  | 7.77  | 7.35  | 5.54  | -6.14 |
| Gm12346      | 6.88  | 8.32  | 9.03  | 7.85  | -6.14 |
| LOC100862094 | 6.88  | 6.52  | 8.6   | 5.62  | -6.12 |
| Gm10020      | 7.8   | 6.95  | 10.12 | 6.67  | -6.11 |
| Gm19494      | 5.48  | 4.61  | 7.83  | 4.35  | -6.1  |
| Gm14760      | 12.59 | 12.94 | 13.05 | 10.79 | -6.09 |
|              | 12.15 | 13.39 | 13.39 | 12.03 | -6.08 |
| Gm5430       | 9.45  | 11.36 | 10.41 | 9.73  | -5.98 |
| Gm4335       | 7.25  | 8.72  | 8.47  | 7.36  | -5.96 |
| Gm12671      | 12.51 | 13.03 | 13.3  | 11.24 | -5.96 |
| Rpl18-ps2    | 7.52  | 6.83  | 9.93  | 6.67  | -5.95 |
| Rpsa-ps9     | 8.08  | 8.84  | 9.96  | 8.17  | -5.91 |
|              | 4.79  | 6.6   | 5.62  | 4.86  | -5.91 |
| Gm14150      | 5.8   | 6     | 7.85  | 5.49  | -5.9  |
| Pts          | 4.81  | 5.43  | 6.5   | 4.57  | -5.88 |

|                     |       |       |       |       |       |
|---------------------|-------|-------|-------|-------|-------|
| Gm11808             | 8.54  | 9.1   | 9.98  | 7.99  | -5.87 |
| Gm13162             | 6.82  | 7.44  | 7.52  | 5.58  | -5.87 |
| Gm11367             | 5.55  | 6.19  | 7.35  | 5.45  | -5.84 |
| Rpl3-ps2            | 15.89 | 15.88 | 17.28 | 14.73 | -5.83 |
| Tubal a             | 7.4   | 7.97  | 9.07  | 7.1   | -5.82 |
|                     | 3.83  | 4.14  | 6.01  | 3.78  | -5.81 |
| Gm4883              | 8.96  | 8.91  | 10.86 | 8.28  | -5.81 |
| Acta2               | 6.79  | 6.66  | 8.52  | 5.86  | -5.8  |
|                     | 7.97  | 9.88  | 9.91  | 9.29  | -5.8  |
| Gm13464             | 12.4  | 13.98 | 13.8  | 12.85 | -5.8  |
| Atp6ap1             | 5.82  | 6.84  | 6.93  | 5.43  | -5.78 |
| Gm12428             | 12.22 | 13.67 | 13.59 | 12.51 | -5.78 |
| Gm18859             | 7.75  | 9.23  | 8.59  | 7.54  | -5.75 |
| Gm6139              | 7.19  | 7.15  | 8.89  | 6.33  | -5.74 |
| Atxn10              | 6.27  | 7.37  | 7.5   | 6.08  | -5.71 |
| Gm20899; Gapdh-ps15 | 7.58  | 8.02  | 7.97  | 5.9   | -5.68 |
|                     | 7.28  | 6.45  | 9.31  | 5.97  | -5.67 |
| Gm6444              | 4.78  | 5.28  | 6.92  | 4.92  | -5.66 |
| Rpl31-ps16          | 17.42 | 17.32 | 17.33 | 14.73 | -5.65 |
| Gm5944              | 8.29  | 9.37  | 8.93  | 7.52  | -5.64 |
| Pdxk                | 6.98  | 7.35  | 7.47  | 5.35  | -5.63 |
| Ndufb7              | 5.41  | 5.9   | 6.87  | 4.86  | -5.62 |
| Gm4654              | 11.74 | 13.37 | 12.47 | 11.62 | -5.61 |
|                     | 13.78 | 15    | 15.24 | 13.98 | -5.58 |
| Gm13509             | 6.66  | 7.68  | 8.4   | 6.95  | -5.56 |
| Cox5a               | 4.99  | 5.2   | 7.77  | 5.51  | -5.53 |
|                     | 4.37  | 4.7   | 6.4   | 4.26  | -5.53 |
|                     | 5.67  | 6.94  | 5.73  | 4.53  | -5.52 |
| Gm23368             | 19.08 | 19.06 | 19.08 | 16.6  | -5.51 |
| Gm8129              | 10.8  | 10.75 | 12.35 | 9.84  | -5.51 |
| Gm5210              | 6.24  | 7.34  | 7.24  | 5.88  | -5.49 |
| Ptprb               | 7.54  | 7.74  | 8.76  | 6.51  | -5.48 |
| Gm15483             | 6.3   | 6.91  | 7.75  | 5.91  | -5.48 |
| Gm11273             | 6.72  | 6.13  | 8.53  | 5.49  | -5.46 |
| Zfp938              | 6.43  | 6.2   | 7.72  | 5.06  | -5.43 |
| Gm12372             | 5.77  | 5.94  | 6.94  | 4.67  | -5.42 |
|                     | 3.74  | 4.56  | 5.24  | 3.63  | -5.41 |
| Psmb5; Mir686       | 7.01  | 5.96  | 8.73  | 5.25  | -5.38 |
| Eif5a13-ps          | 4.84  | 5.2   | 6.5   | 4.43  | -5.34 |
|                     | 6.32  | 5.46  | 7.18  | 3.9   | -5.34 |
| Gm24269             | 11.94 | 12.94 | 13.07 | 11.66 | -5.31 |
| Gm10284             | 14.79 | 16.18 | 15.67 | 14.67 | -5.24 |
| Gm14046             | 8.21  | 8.23  | 8.58  | 6.22  | -5.23 |

|                             |       |       |       |       |       |
|-----------------------------|-------|-------|-------|-------|-------|
| Gm14148                     | 11.49 | 12.21 | 12.65 | 10.99 | -5.22 |
| Arl8b                       | 6.44  | 6.55  | 7.95  | 5.69  | -5.2  |
| Gm13882                     | 9.43  | 11.13 | 10.54 | 9.86  | -5.19 |
| Gm6863                      | 11.35 | 11.44 | 12.36 | 10.08 | -5.17 |
| Cds2                        | 7.79  | 8.04  | 8.85  | 6.73  | -5.16 |
| Tuba4a                      | 5.01  | 5.73  | 6.48  | 4.83  | -5.16 |
| Gm5777                      | 8.05  | 8.02  | 9.54  | 7.15  | -5.14 |
| Nedd4                       | 8.15  | 8.46  | 8.82  | 6.78  | -5.1  |
| Gm11249                     | 9.3   | 8.9   | 11.36 | 8.61  | -5.09 |
| Gm2004                      | 8.83  | 8.94  | 10.02 | 7.78  | -5.07 |
| Gm26944; RP23-474B13.3      | 4.13  | 5.63  | 4.97  | 4.14  | -5.07 |
| Fis1                        | 6.77  | 7.42  | 7.84  | 6.16  | -5.03 |
| Rpl31-ps11                  | 17.08 | 17.03 | 17.03 | 14.64 | -5.01 |
| Clk3                        | 5.73  | 6.58  | 7.13  | 5.65  | -5    |
| Gm17150                     | 10.06 | 9.59  | 12.08 | 9.3   | -4.99 |
| Ubc; Uba52                  | 9.72  | 10.2  | 12.18 | 10.34 | -4.97 |
| Clu                         | 5.88  | 6.62  | 7.22  | 5.66  | -4.95 |
| Gm10224                     | 7.02  | 6.57  | 8.55  | 5.8   | -4.93 |
| Ppp2cb                      | 3.92  | 4.76  | 5.37  | 3.92  | -4.9  |
|                             | 6.29  | 6.81  | 7.97  | 6.2   | -4.88 |
| Prpf8                       | 5.43  | 5.76  | 7.24  | 5.28  | -4.87 |
|                             | 9.38  | 9.47  | 10.37 | 8.19  | -4.84 |
| Gm10313                     | 8.5   | 9.37  | 9.53  | 8.13  | -4.84 |
|                             | 3.95  | 4.96  | 5.04  | 3.78  | -4.81 |
| Mal                         | 7.79  | 7.8   | 7.73  | 5.47  | -4.8  |
| Gm19738                     | 6.13  | 5.36  | 7.99  | 4.96  | -4.8  |
| Dusp6                       | 4.95  | 6.77  | 5.68  | 5.24  | -4.78 |
| Gm2574                      | 8.86  | 9.19  | 8.71  | 6.78  | -4.77 |
| Sparcl1                     | 15.31 | 15.35 | 16.38 | 14.17 | -4.76 |
| Rpl31-ps17                  | 16.17 | 16.12 | 16.12 | 13.81 | -4.76 |
| Ndufb6                      | 5.47  | 6.2   | 7.18  | 5.66  | -4.74 |
| Gm24811                     | 13.95 | 13.51 | 15.19 | 12.5  | -4.74 |
| Rpl31-ps20                  | 15.37 | 15.35 | 15.39 | 13.13 | -4.74 |
| Atp1a2                      | 10.16 | 10.4  | 11.74 | 9.75  | -4.72 |
| Prkag1                      | 5.09  | 4.93  | 7.03  | 4.63  | -4.72 |
| Tuba1b                      | 6.29  | 6.48  | 8.05  | 5.99  | -4.72 |
| Gm3608                      | 5.62  | 5.6   | 7.27  | 5.01  | -4.72 |
| Gm15459                     | 11.88 | 12.46 | 12.88 | 11.24 | -4.65 |
| Gm8927                      | 9.44  | 10.1  | 10.5  | 8.95  | -4.64 |
| LOC100862170; 4933409K07Rik | 7.2   | 7.74  | 8.61  | 6.94  | -4.64 |
| Eif4g2                      | 7.09  | 7.4   | 8.32  | 6.42  | -4.63 |
| Grm3                        | 7.52  | 7.97  | 8.57  | 6.81  | -4.63 |

|                 |       |       |       |       |       |
|-----------------|-------|-------|-------|-------|-------|
| Npm1            | 8.59  | 9.35  | 10.04 | 8.59  | -4.63 |
| Glyrl           | 6.15  | 7.25  | 6.53  | 5.41  | -4.62 |
| Brms1l          | 4.77  | 5.66  | 6.29  | 4.98  | -4.61 |
| Plpp3           | 4.81  | 5.4   | 5.64  | 4.03  | -4.59 |
|                 | 7.13  | 6.35  | 8.83  | 5.85  | -4.59 |
| 2900011O08Rik   | 6.25  | 6.91  | 7.62  | 6.09  | -4.58 |
| Gm5564          | 8.14  | 7.05  | 9.08  | 5.79  | -4.58 |
| Gm14165         | 6.44  | 6.72  | 7.62  | 5.71  | -4.57 |
|                 | 3.87  | 5.1   | 5.72  | 4.76  | -4.54 |
|                 | 12.13 | 13.33 | 13.37 | 12.39 | -4.53 |
| Rpl28-ps3       | 8.72  | 8.99  | 10.64 | 8.73  | -4.53 |
|                 | 4.41  | 5.17  | 5.4   | 3.98  | -4.52 |
| Gm1866          | 4.45  | 5.23  | 6.02  | 4.62  | -4.52 |
| Gm7497          | 5.34  | 5.54  | 7.08  | 5.11  | -4.52 |
| Apoa1bp         | 7.55  | 7.37  | 9.11  | 6.76  | -4.51 |
| Chst1           | 5.73  | 7.06  | 6.41  | 5.57  | -4.51 |
| BC002163        | 6.28  | 6.54  | 8.03  | 6.11  | -4.5  |
| Mpz1l           | 4.74  | 5.75  | 5.95  | 4.78  | -4.5  |
| Gm10736         | 6.47  | 7.18  | 7.23  | 5.77  | -4.48 |
|                 | 5.19  | 6.68  | 6.06  | 5.38  | -4.47 |
| Aspn            | 5.42  | 6.39  | 6.32  | 5.14  | -4.42 |
| Gm16399         | 6.17  | 5.9   | 7.7   | 5.29  | -4.38 |
| Utn             | 7.26  | 7.84  | 8.35  | 6.81  | -4.37 |
|                 | 6.04  | 5.64  | 7.66  | 5.13  | -4.36 |
| Gm5265          | 5.56  | 6.35  | 7.47  | 6.14  | -4.36 |
| Gm7507          | 9.47  | 10.73 | 10.26 | 9.4   | -4.35 |
| Gm10221         | 9.4   | 9.38  | 11.15 | 9     | -4.35 |
| Ctnnb1; Mir7090 | 5.44  | 6.22  | 6.43  | 5.09  | -4.34 |
| Cox5b           | 8.82  | 7.9   | 10.4  | 7.37  | -4.34 |
| Ube2l3          | 6.16  | 6.39  | 7.68  | 5.79  | -4.34 |
|                 | 5.47  | 6.55  | 6.12  | 5.09  | -4.33 |
| Actg1; Mir6935  | 6.88  | 6.76  | 8.18  | 5.95  | -4.32 |
|                 | 3.73  | 4.55  | 5.03  | 3.75  | -4.31 |
| Mir6412         | 8.1   | 7.91  | 9.69  | 7.4   | -4.3  |
| Mobp            | 6.44  | 7.66  | 6.16  | 5.27  | -4.3  |
| Gm14399         | 8.11  | 7.68  | 9.48  | 6.95  | -4.29 |
| Gm9625          | 5.97  | 6.34  | 7.43  | 5.7   | -4.28 |
| Gm23141         | 6.71  | 7.16  | 7.55  | 5.91  | -4.28 |
| Gm17228         | 4.26  | 6.04  | 4.55  | 4.24  | -4.26 |
| Rabac1          | 5.88  | 6.08  | 8.02  | 6.14  | -4.24 |
| Pak1            | 9.73  | 10.92 | 10.85 | 9.96  | -4.23 |
| Rpl31-ps13      | 13.89 | 13.88 | 13.88 | 11.78 | -4.23 |
| Gm3695          | 6.89  | 8.16  | 8.15  | 7.35  | -4.22 |
| Igfbp7          | 6.68  | 6.66  | 7.92  | 5.82  | -4.21 |



|                                  |       |       |       |       |       |
|----------------------------------|-------|-------|-------|-------|-------|
| Gm19976                          | 6.29  | 5.98  | 7.42  | 5.03  | -4.21 |
| Elf1                             | 4.31  | 5.07  | 5.75  | 4.43  | -4.2  |
| Gm14777                          | 7.93  | 9.42  | 8.67  | 8.09  | -4.19 |
| Gm10293                          | 14.02 | 15.82 | 14.66 | 14.39 | -4.19 |
| Gm5139                           | 6.93  | 7.55  | 7.83  | 6.39  | -4.17 |
| Ptgds                            | 7.83  | 8.1   | 8.94  | 7.15  | -4.16 |
| Pten                             | 5.49  | 5.83  | 6.68  | 4.96  | -4.16 |
| Gm23119                          | 5.4   | 4.98  | 6.39  | 3.92  | -4.16 |
| Gm10015                          | 6.14  | 6.21  | 7.48  | 5.5   | -4.15 |
| Rpl32-ps                         | 7.93  | 9.23  | 9.11  | 8.36  | -4.15 |
| Gm8055                           | 7.13  | 9.01  | 7.82  | 7.66  | -4.13 |
| Hspa4                            | 6.62  | 6.88  | 7.68  | 5.9   | -4.12 |
|                                  | 4.9   | 5.66  | 6.67  | 5.4   | -4.11 |
| Rpl31-ps10                       | 16.72 | 16.49 | 16.62 | 14.35 | -4.11 |
|                                  | 4.56  | 4.65  | 6.17  | 4.22  | -4.1  |
| Cct5                             | 5.66  | 6.03  | 6.88  | 5.22  | -4.09 |
| Wsb1                             | 5.35  | 5.43  | 6.66  | 4.71  | -4.09 |
|                                  | 6.13  | 6.96  | 6.78  | 5.58  | -4.08 |
| Gm25128                          | 7.22  | 6.68  | 7.91  | 5.35  | -4.04 |
|                                  | 4.08  | 3.96  | 5.76  | 3.62  | -4.03 |
| Gm9844                           | 7.42  | 8.16  | 8.32  | 7.06  | -4.03 |
| Gm14870                          | 5.6   | 5.78  | 6.48  | 4.65  | -4.02 |
| Gm15484                          | 6.95  | 8.5   | 7.84  | 7.39  | -4    |
| Gm27248                          | 6.49  | 7.18  | 7.63  | 6.32  | -4    |
| Atp6v1e1                         | 8.64  | 8.82  | 8.82  | 7.01  | -3.99 |
| Gm14130                          | 8.8   | 10.1  | 9.64  | 8.95  | -3.99 |
| Slc2a1                           | 10.11 | 10.09 | 10.48 | 8.47  | -3.98 |
| Atp1b2                           | 5.01  | 5.65  | 6.43  | 5.08  | -3.96 |
| Tecr                             | 7.48  | 7.53  | 8.86  | 6.92  | -3.95 |
| Gm12033                          | 9.32  | 9.78  | 9.69  | 8.17  | -3.95 |
| Gm5566                           | 5.06  | 5.57  | 5.96  | 4.49  | -3.95 |
| Gm13298;<br>Fam205a4;<br>Gm20938 | 4.7   | 5.46  | 5.89  | 4.67  | -3.94 |
| Cox6a1                           | 7.81  | 7.27  | 9.39  | 6.87  | -3.93 |
|                                  | 4.13  | 4.57  | 5.54  | 4     | -3.93 |
|                                  | 4.71  | 4.74  | 6.17  | 4.24  | -3.91 |
| Cops3                            | 5     | 5.26  | 6.3   | 4.6   | -3.9  |
| Snord16a                         | 3.42  | 3.55  | 5.52  | 3.69  | -3.9  |
| Gm10126                          | 8.36  | 9.68  | 9.27  | 8.63  | -3.9  |
| Gm23872                          | 14.52 | 14.81 | 15.21 | 13.54 | -3.9  |
| Gm10051                          | 8.25  | 8.61  | 9.93  | 8.32  | -3.9  |
| Gm16412                          | 5.98  | 6     | 7.5   | 5.57  | -3.9  |
| Glr3; Gm12669                    | 8.2   | 8.63  | 8.95  | 7.42  | -3.88 |

|           |       |       |       |       |       |
|-----------|-------|-------|-------|-------|-------|
| Gm13573   | 6.01  | 6.34  | 7.77  | 6.14  | -3.88 |
| Gm2383    | 6.77  | 8.43  | 7.38  | 7.08  | -3.87 |
| Gm13862   | 7.13  | 7.93  | 8.44  | 7.28  | -3.87 |
| Gm23053   | 16.92 | 16.79 | 18.12 | 16.04 | -3.87 |
| Tgfb3     | 4.82  | 5.11  | 5.94  | 4.31  | -3.8  |
| Tsn       | 5.03  | 5.17  | 6.44  | 4.65  | -3.8  |
|           | 14.8  | 15.65 | 15.61 | 14.54 | -3.8  |
| Abhd3     | 5.61  | 5.96  | 6.79  | 5.22  | -3.79 |
| Erh       | 5.32  | 5.95  | 6.85  | 5.55  | -3.79 |
| Kcna1     | 6.28  | 6.56  | 7.16  | 5.52  | -3.78 |
|           | 5.95  | 6.88  | 7.01  | 6.03  | -3.78 |
| Rpl28-ps1 | 9.29  | 9.75  | 10.78 | 9.33  | -3.78 |
| Crry-ps   | 5.26  | 6.21  | 6.55  | 5.58  | -3.77 |
| Ptprg     | 6.49  | 6.57  | 7.16  | 5.33  | -3.77 |
| Rab24     | 5.47  | 5.29  | 6.71  | 4.61  | -3.77 |
|           | 4.41  | 5     | 5.74  | 4.42  | -3.77 |
| Cisd1     | 3.95  | 4.38  | 5.35  | 3.87  | -3.75 |
| Gm14403   | 7.31  | 7.09  | 8.51  | 6.39  | -3.73 |
| Gm5787    | 6.54  | 7.33  | 7.42  | 6.31  | -3.73 |
|           | 5.11  | 6.48  | 6.22  | 5.71  | -3.7  |
| Pgam1-ps2 | 5.81  | 6.97  | 6.68  | 5.95  | -3.69 |
| Cd248     | 4.63  | 5.26  | 5.79  | 4.54  | -3.68 |
| Ncam1     | 5.22  | 5.75  | 6.46  | 5.11  | -3.68 |
| Pcna-ps2  | 4.7   | 5.26  | 6.05  | 4.73  | -3.68 |
| Pcnp      | 5.84  | 6.02  | 7.38  | 5.69  | -3.67 |
| Gm6807    | 5.35  | 5.93  | 6.22  | 4.93  | -3.65 |
| Gm16355   | 5.77  | 6.07  | 6.65  | 5.09  | -3.64 |
| Rgs7bp    | 5.66  | 7.39  | 6.96  | 6.83  | -3.63 |
| Trf       | 8.58  | 8.55  | 9.62  | 7.73  | -3.63 |
| Ntsr2     | 4.94  | 5.76  | 6     | 4.96  | -3.62 |
| Gm12070   | 6.36  | 6.88  | 6.48  | 5.14  | -3.62 |
| Gm8420    | 4.76  | 5.14  | 5.68  | 4.21  | -3.61 |
| Rpl15-ps3 | 6.15  | 6.35  | 6.99  | 5.34  | -3.61 |
| Arl5a     | 6.1   | 6.66  | 7.21  | 5.93  | -3.6  |
| Mir1195   | 15.56 | 15.56 | 15.57 | 13.72 | -3.59 |
| Gm11223   | 11.56 | 11.83 | 12.39 | 10.82 | -3.59 |
| Gm27731   | 7.88  | 8.18  | 8.51  | 6.97  | -3.58 |
| Ndufa10   | 5.82  | 6.26  | 7     | 5.6   | -3.57 |
| Gm6822    | 5.91  | 6.08  | 7.51  | 5.84  | -3.57 |
| Gm8318    | 6.52  | 8.09  | 6.95  | 6.69  | -3.55 |
| Dynlrb1   | 8.45  | 8.19  | 9.78  | 7.7   | -3.54 |
| Gm10540   | 11.56 | 11.33 | 12.29 | 10.24 | -3.54 |
| Gm12074   | 4.37  | 4.27  | 5.63  | 3.7   | -3.54 |
| Atp1a3    | 7.13  | 7.92  | 8.38  | 7.35  | -3.53 |

|                      |       |       |       |       |       |
|----------------------|-------|-------|-------|-------|-------|
| Uqcr2                | 5.74  | 6.18  | 6.98  | 5.61  | -3.53 |
| Ntan1                | 5.17  | 6.21  | 5.52  | 4.74  | -3.52 |
| Gm10480              | 9.43  | 10.15 | 10.47 | 9.38  | -3.52 |
|                      | 9.38  | 9.21  | 9.42  | 7.45  | -3.5  |
| Gm12967              | 5.51  | 6.57  | 6.54  | 5.79  | -3.5  |
| Gm17420              | 12.27 | 13.04 | 13.22 | 12.18 | -3.5  |
| Gm11336              | 4.65  | 5.28  | 5.34  | 4.18  | -3.46 |
| Enpp5                | 5.1   | 5.98  | 5.68  | 4.78  | -3.43 |
| Oat                  | 4.29  | 4.92  | 5.25  | 4.1   | -3.43 |
|                      | 5.82  | 6.15  | 7.07  | 5.61  | -3.43 |
| Gm12481              | 6.11  | 6.21  | 7.9   | 6.23  | -3.42 |
| LOC100862081         | 7.2   | 7.32  | 8.32  | 6.67  | -3.42 |
|                      | 4.41  | 5.06  | 5.32  | 4.21  | -3.41 |
| Rock1                | 6.14  | 5.73  | 7.26  | 5.08  | -3.4  |
| Rpl31-ps1            | 13.41 | 13.33 | 13.49 | 11.64 | -3.39 |
| Aff4                 | 5.88  | 6.23  | 7.05  | 5.64  | -3.38 |
| Gm11557              | 7.01  | 8.27  | 7.74  | 7.25  | -3.38 |
| Hipk3; Mir1902       | 6.66  | 7.4   | 7.73  | 6.72  | -3.37 |
| Klf6                 | 6.78  | 6.95  | 7.3   | 5.71  | -3.37 |
|                      | 5.3   | 6.04  | 5.41  | 4.4   | -3.37 |
| Gm5844               | 8.04  | 8.57  | 9.6   | 8.39  | -3.37 |
| Fam205a2;<br>Gm10600 | 4.8   | 5.58  | 5.81  | 4.85  | -3.36 |
| Kif5b                | 8     | 8.01  | 8.87  | 7.13  | -3.35 |
| Gm8730               | 6.53  | 6.51  | 7.3   | 5.54  | -3.34 |
| Mlc1                 | 6.16  | 7.31  | 7.32  | 6.73  | -3.33 |
| Stk39                | 6.56  | 6.86  | 7.75  | 6.32  | -3.32 |
|                      | 4.21  | 4.4   | 6.1   | 4.57  | -3.32 |
| Gm20775              | 5.1   | 5.85  | 6.37  | 5.39  | -3.32 |
| Atp1b1               | 8.43  | 8.69  | 10.15 | 8.69  | -3.31 |
| Pcna                 | 4.95  | 5.37  | 6.24  | 4.95  | -3.29 |
| Gm12922              | 9.2   | 9.24  | 10.36 | 8.67  | -3.29 |
| Mtch1                | 7.24  | 7.7   | 8.29  | 7.04  | -3.28 |
| Dhx9                 | 6.35  | 6.76  | 7.46  | 6.16  | -3.26 |
|                      | 4.3   | 4.73  | 5.33  | 4.05  | -3.26 |
| Gm13171              | 4.58  | 4.94  | 5.54  | 4.2   | -3.25 |
| Gm14269              | 7.32  | 7.15  | 8.01  | 6.14  | -3.25 |
| Gm19767              | 4.73  | 4.7   | 6.15  | 4.42  | -3.25 |
| 1500011B03Rik        | 4.99  | 5.82  | 5.89  | 5.03  | -3.23 |
|                      | 5.26  | 5.36  | 6.59  | 4.99  | -3.23 |
| Gm13226              | 7.17  | 7.59  | 8.61  | 7.33  | -3.23 |
| Gm14388              | 3.88  | 4.35  | 5.32  | 4.1   | -3.23 |
| Gm26983              | 4.28  | 4.82  | 5.53  | 4.38  | -3.23 |
| Gm4518               | 13    | 13.16 | 13.5  | 11.97 | -3.22 |

|                          |       |       |       |       |       |
|--------------------------|-------|-------|-------|-------|-------|
| Gm6322                   | 5.73  | 6.82  | 6.36  | 5.76  | -3.22 |
| Amd2; Amd1               | 6.79  | 6.6   | 8.07  | 6.2   | -3.21 |
| Tmem47                   | 5.82  | 5.97  | 6.7   | 5.16  | -3.21 |
|                          | 4.6   | 4.89  | 5.62  | 4.23  | -3.21 |
| Gm17756                  | 4.31  | 4.53  | 5.43  | 3.96  | -3.21 |
| Ephx1                    | 5.94  | 5.99  | 7.06  | 5.43  | -3.2  |
| Myh11                    | 5.67  | 6.22  | 6.62  | 5.5   | -3.19 |
| Gm27038                  | 4.75  | 5.13  | 5.45  | 4.15  | -3.19 |
| Gatad1                   | 5.26  | 5.79  | 6.49  | 5.35  | -3.18 |
| Myl6                     | 11.52 | 11.48 | 12.28 | 10.58 | -3.17 |
|                          | 4.04  | 4.28  | 5.62  | 4.2   | -3.17 |
| Gm6054                   | 6.97  | 7.01  | 7.77  | 6.16  | -3.16 |
| Gm11539                  | 5.88  | 5.84  | 7.47  | 5.77  | -3.16 |
| Gm8100                   | 8.59  | 9.56  | 8.93  | 8.24  | -3.15 |
| Cox4i1                   | 6.15  | 6.48  | 7.29  | 5.96  | -3.14 |
| Pcdh9                    | 5.26  | 5.29  | 6.92  | 5.3   | -3.14 |
| Ppa1                     | 5.42  | 5.43  | 6.6   | 4.96  | -3.14 |
| Gm8738                   | 4.51  | 5.21  | 5.83  | 4.87  | -3.14 |
| Gstp1                    | 5.78  | 5.99  | 7.12  | 5.68  | -3.12 |
| Nucb2                    | 5.95  | 6.06  | 7.09  | 5.56  | -3.12 |
| Atp2b4; Mir6903          | 5.99  | 6.03  | 7.1   | 5.5   | -3.11 |
| Ctsb                     | 6.46  | 6.75  | 7.75  | 6.4   | -3.11 |
| Gm14322                  | 7.88  | 7.55  | 8.66  | 6.69  | -3.11 |
| Gm12017                  | 7.62  | 8.83  | 8.13  | 7.7   | -3.11 |
| Clic4                    | 5.57  | 6.21  | 6.8   | 5.82  | -3.09 |
| Rpl32                    | 6.44  | 7.17  | 7.55  | 6.66  | -3.09 |
| Uchl1                    | 4.86  | 4.75  | 6.39  | 4.65  | -3.09 |
| LOC100862063             | 4.47  | 4.56  | 5.63  | 4.09  | -3.09 |
| Kif1a                    | 6.61  | 7.31  | 7.73  | 6.8   | -3.08 |
| Gm3893;<br>4933409K07Rik | 6.52  | 7.11  | 7.6   | 6.57  | -3.08 |
| Snx32                    | 4.45  | 5.23  | 5.45  | 4.6   | -3.08 |
| Dctn2                    | 4.35  | 5.03  | 5.47  | 4.53  | -3.07 |
| Gatm                     | 6.98  | 7.17  | 7.46  | 6.03  | -3.06 |
|                          | 4.47  | 4.74  | 5.59  | 4.24  | -3.06 |
|                          | 4.34  | 4.35  | 5.67  | 4.07  | -3.06 |
| Napb                     | 5.39  | 5.52  | 6.75  | 5.27  | -3.05 |
|                          | 4.93  | 5.47  | 5.97  | 4.89  | -3.05 |
| Lanc11                   | 5.26  | 5.39  | 6.4   | 4.92  | -3.04 |
| Nfe211                   | 7.6   | 7.69  | 8.59  | 7.08  | -3.04 |
|                          | 3.58  | 5.15  | 3.58  | 3.55  | -3.04 |
| Gm2897                   | 4.89  | 5.83  | 5.17  | 4.51  | -3.04 |
| Gm9938                   | 3.94  | 4.76  | 4.93  | 4.15  | -3.04 |

|                                  |       |       |       |       |       |
|----------------------------------|-------|-------|-------|-------|-------|
| Gm13298;<br>Fam205a2             | 4.87  | 5.39  | 5.77  | 4.69  | -3.04 |
| Gm13298;<br>Fam205a3;<br>Gm21598 | 4.87  | 5.39  | 5.77  | 4.69  | -3.04 |
|                                  | 4.96  | 5.63  | 5.54  | 4.62  | -3.03 |
| Arxes1                           | 3.94  | 4.43  | 4.94  | 3.84  | -3.02 |
| Atp5b                            | 6.91  | 6.84  | 8.49  | 6.82  | -3.02 |
| Ndufa9                           | 6.31  | 6.22  | 7.16  | 5.47  | -3.02 |
| Gm4462                           | 6.79  | 7.45  | 7.32  | 6.39  | -3.02 |
| Gm23045                          | 19.16 | 19.16 | 19.19 | 17.59 | -3.02 |
| Gm15975                          | 4.01  | 5.19  | 4.63  | 4.22  | -3.01 |
| Med29                            | 4.11  | 4.86  | 5.01  | 4.17  | -3    |
| Sv2b                             | 5.91  | 6.77  | 7.11  | 6.38  | -3    |
| Tmod2                            | 6.72  | 6.77  | 7.63  | 6.09  | -3    |
| Gm25233                          | 5.65  | 6.11  | 6.38  | 5.26  | -3    |
| App                              | 7.34  | 7.98  | 7.93  | 7     | -2.98 |
| Gm10408                          | 4.42  | 5.77  | 4.5   | 4.28  | -2.98 |
| Raph1                            | 4.54  | 4.64  | 5.71  | 4.23  | -2.98 |
| Gm14421                          | 6.81  | 6.67  | 7.51  | 5.81  | -2.96 |
| Pik3r3                           | 6.39  | 6.57  | 7.33  | 5.94  | -2.95 |
|                                  | 3.81  | 4.68  | 4.39  | 3.7   | -2.95 |
| A130040M12Rik                    | 6.44  | 6.67  | 7.29  | 5.97  | -2.94 |
| Gdi1                             | 9.65  | 9.94  | 11.43 | 10.18 | -2.92 |
| Ociad2                           | 5.75  | 6     | 6.67  | 5.38  | -2.91 |
| Slc38a11                         | 5.76  | 5.93  | 6.45  | 5.07  | -2.91 |
|                                  | 5.59  | 7.01  | 5.76  | 5.65  | -2.91 |
| Slc25a18                         | 4.19  | 5.22  | 5.46  | 4.94  | -2.9  |
|                                  | 4.34  | 4.89  | 4.99  | 4.01  | -2.9  |
| Cdc37l1                          | 5.63  | 6.25  | 6.05  | 5.13  | -2.89 |
| Ldhb                             | 7.04  | 7.05  | 7.88  | 6.36  | -2.89 |
| Ppargc1a                         | 5.06  | 5.51  | 5.99  | 4.9   | -2.89 |
|                                  | 5.91  | 6.77  | 6.68  | 6     | -2.89 |
| Maf                              | 4.76  | 5.13  | 5.88  | 4.73  | -2.88 |
| Slc12a2                          | 4.41  | 4.52  | 5.72  | 4.3   | -2.88 |
|                                  | 6.34  | 7.25  | 7.29  | 6.67  | -2.88 |
| Gm11511                          | 3.52  | 3.71  | 5.2   | 3.87  | -2.88 |
| Psmc1                            | 6.9   | 6.45  | 7.92  | 5.95  | -2.87 |
| Ppp6r3                           | 5.73  | 6.34  | 6.36  | 5.44  | -2.87 |
|                                  | 4.57  | 5.46  | 4.97  | 4.34  | -2.87 |
| Oxct1                            | 5.62  | 6.23  | 6.71  | 5.81  | -2.86 |
| Atp2a2                           | 9.67  | 9.21  | 10.64 | 8.66  | -2.86 |
| Map1b                            | 6.79  | 7.38  | 7.17  | 6.25  | -2.86 |
| Nrd1; Mir761                     | 7.04  | 7.09  | 7.71  | 6.25  | -2.86 |

|         |       |       |       |       |       |
|---------|-------|-------|-------|-------|-------|
| Ptn     | 9.08  | 8.94  | 9.47  | 7.82  | -2.86 |
| Gm6134  | 5.56  | 6.24  | 6.46  | 5.62  | -2.86 |
| Myl12b  | 7.48  | 8.08  | 8.33  | 7.43  | -2.85 |
| Vim     | 4.6   | 4.83  | 5.82  | 4.54  | -2.83 |
| Gm6887  | 5.29  | 5.36  | 5.69  | 4.26  | -2.83 |
| Pnmall  | 5.6   | 5.92  | 6.69  | 5.53  | -2.82 |
| Rpl37   | 9.52  | 10.9  | 10.46 | 10.34 | -2.82 |
| Gm10481 | 12.49 | 13    | 13.13 | 12.14 | -2.82 |
|         | 4.16  | 4.39  | 5.39  | 4.13  | -2.81 |
| Ost4    | 6.93  | 6.55  | 8.21  | 6.35  | -2.8  |
| Gmps    | 4.23  | 4.6   | 5.29  | 4.19  | -2.79 |
| Hivep1  | 4.83  | 5.4   | 6.15  | 5.25  | -2.79 |
| Sumo1   | 6.33  | 6.28  | 7.12  | 5.59  | -2.79 |
| Gm5612  | 6.63  | 7.39  | 7.96  | 7.25  | -2.79 |
| Gm19974 | 4.88  | 5.11  | 6.37  | 5.12  | -2.79 |
|         | 5.16  | 5.6   | 5.83  | 4.79  | -2.78 |
|         | 5.16  | 5.6   | 5.83  | 4.79  | -2.78 |
| Lrp1    | 5.93  | 6.43  | 6.94  | 5.97  | -2.78 |
| Gm4353  | 3.99  | 5.01  | 4.48  | 4.03  | -2.78 |
| Gm11849 | 7.08  | 7.12  | 7.79  | 6.36  | -2.78 |
| Atp5a1  | 6.94  | 6.98  | 7.54  | 6.11  | -2.77 |
|         | 4.4   | 4.3   | 5.49  | 3.91  | -2.77 |
| Camk2g  | 6.42  | 6.69  | 6.93  | 5.74  | -2.76 |
| Gsk3a   | 5.76  | 6.71  | 6.51  | 5.98  | -2.76 |
|         | 3.91  | 5.09  | 4.07  | 3.78  | -2.76 |
| Gm10566 | 13.56 | 13.72 | 13.85 | 12.55 | -2.76 |
| Carm1   | 4.79  | 5.07  | 5.75  | 4.57  | -2.75 |
| Micu2   | 5.02  | 5.23  | 5.99  | 4.75  | -2.75 |
|         | 4.17  | 4.75  | 4.89  | 4.02  | -2.75 |
| Gm5866  | 5.6   | 6.16  | 6.25  | 5.35  | -2.75 |
| Gm6055  | 6.08  | 5.87  | 7.4   | 5.73  | -2.75 |
| Gm9103  | 4.54  | 4.95  | 5.41  | 4.36  | -2.75 |
| Gm11824 | 6.25  | 6.84  | 6.92  | 6.05  | -2.75 |
| Cfdp1   | 5.94  | 6.07  | 7.02  | 5.7   | -2.74 |
| Gcnt2   | 5.02  | 5.16  | 5.67  | 4.35  | -2.74 |
|         | 5.93  | 6.61  | 6.78  | 6.02  | -2.74 |
| Psmb2   | 4.2   | 4.69  | 5.12  | 4.16  | -2.73 |
| Ube2n   | 5.11  | 5.47  | 6.07  | 4.97  | -2.73 |
|         | 3.94  | 4.71  | 4.54  | 3.87  | -2.73 |
| Gm4987  | 5.35  | 5.97  | 6.35  | 5.53  | -2.73 |
| Ap3d1   | 5.36  | 5.74  | 6.07  | 5.01  | -2.72 |
| Zfp931  | 5.61  | 5.36  | 6.77  | 5.08  | -2.72 |
| Flna    | 7.17  | 6.85  | 7.99  | 6.24  | -2.71 |
| Naa38   | 4.25  | 4.5   | 5.18  | 3.99  | -2.71 |

|              |       |       |       |       |       |
|--------------|-------|-------|-------|-------|-------|
|              | 4.07  | 4.94  | 4.65  | 4.07  | -2.71 |
| Rngtt        | 4.47  | 4.98  | 5.7   | 4.78  | -2.7  |
|              | 5.09  | 5.19  | 5.96  | 4.63  | -2.7  |
|              | 3.96  | 4.95  | 4.3   | 3.86  | -2.7  |
| Cdc42bpa     | 5.96  | 6.49  | 6.59  | 5.7   | -2.69 |
|              | 3.7   | 4.72  | 4.66  | 4.26  | -2.69 |
| Babaml       | 5.54  | 5.76  | 7.09  | 5.89  | -2.68 |
|              | 5.56  | 6.89  | 5.43  | 5.33  | -2.68 |
| Pdhhb        | 6.06  | 6.22  | 7.28  | 6     | -2.68 |
| Rnfl87       | 5.37  | 5.85  | 6.37  | 5.43  | -2.68 |
|              | 4.23  | 4.83  | 5.13  | 4.3   | -2.68 |
| Gm14418      | 7.91  | 7.46  | 8.66  | 6.8   | -2.68 |
| Atrnl1       | 5.64  | 6.03  | 6.76  | 5.74  | -2.67 |
| Gabbr2       | 6.72  | 7.56  | 7.81  | 7.24  | -2.67 |
| Idh3g        | 7.19  | 7.04  | 7.64  | 6.07  | -2.67 |
| Gm10358      | 12.79 | 13.12 | 13.23 | 12.14 | -2.67 |
| Gm25591      | 12.29 | 12.21 | 12.02 | 10.52 | -2.67 |
| Ube2k        | 7     | 7.4   | 7.72  | 6.71  | -2.66 |
| Nol4         | 4.78  | 4.9   | 5.85  | 4.57  | -2.65 |
| Il6st        | 5.5   | 5.8   | 6.16  | 5.06  | -2.64 |
| D17Ertd648e  | 5.68  | 6.55  | 6.04  | 5.51  | -2.62 |
| Rap2a        | 4.51  | 4.87  | 5.35  | 4.33  | -2.62 |
| Cyr61        | 5.22  | 5.84  | 5.96  | 5.2   | -2.61 |
| Sept11       | 6.47  | 6.93  | 7.35  | 6.42  | -2.61 |
| Saraf        | 4.51  | 5.01  | 5.15  | 4.27  | -2.61 |
| Gm12727      | 5.9   | 6.01  | 6.72  | 5.45  | -2.61 |
| Cd63         | 8.53  | 8.48  | 9.03  | 7.6   | -2.6  |
|              | 5.96  | 6.68  | 6.73  | 6.08  | -2.6  |
|              | 4.55  | 4.42  | 5.87  | 4.35  | -2.6  |
| Fam205a1     | 4.42  | 5.02  | 5.03  | 4.26  | -2.59 |
| Ppp1r14b     | 5.38  | 5.85  | 6.52  | 5.63  | -2.59 |
| Gm4468       | 5.56  | 6.07  | 6.54  | 5.68  | -2.58 |
|              | 3.7   | 4     | 4.68  | 3.61  | -2.57 |
| Arntl        | 4.96  | 5.34  | 5.55  | 4.58  | -2.56 |
| Gm22930      | 5.45  | 5.32  | 6.84  | 5.35  | -2.56 |
| LOC100862384 | 4.82  | 4.33  | 6.16  | 4.31  | -2.56 |
| Bcan         | 5.87  | 6.35  | 6.41  | 5.54  | -2.55 |
| Capn7        | 6.92  | 7.26  | 7.33  | 6.33  | -2.55 |
| Tubg1        | 5.12  | 5.6   | 6.01  | 5.14  | -2.55 |
|              | 5.84  | 6.73  | 6.23  | 5.77  | -2.55 |
| Gm13050      | 5.07  | 5.19  | 6.17  | 4.94  | -2.55 |
|              | 6.97  | 7.06  | 8.12  | 6.87  | -2.54 |
|              | 3.97  | 5.48  | 4.13  | 4.29  | -2.54 |
|              | 3.63  | 4.77  | 3.99  | 3.78  | -2.54 |

|                        |       |       |       |       |       |
|------------------------|-------|-------|-------|-------|-------|
| Hcn2                   | 4.32  | 5.21  | 4.79  | 4.34  | -2.53 |
| Stub1; Mir3082         | 5.46  | 5.92  | 6.36  | 5.48  | -2.53 |
| Pdxp                   | 3.67  | 4.12  | 4.46  | 3.58  | -2.52 |
| Rplp0                  | 6.49  | 6.48  | 7.28  | 5.93  | -2.52 |
| Slc38a3                | 5.46  | 5.68  | 6.49  | 5.38  | -2.52 |
|                        | 4.21  | 4.95  | 4.74  | 4.14  | -2.52 |
| Gm23064                | 16.52 | 16.68 | 17.26 | 16.09 | -2.52 |
| Gm25355                | 16.52 | 16.68 | 17.26 | 16.09 | -2.52 |
| Myl9                   | 6.33  | 6.43  | 6.91  | 5.69  | -2.51 |
| Smarcc2                | 7.82  | 8.47  | 8.44  | 7.76  | -2.51 |
| Cwc15                  | 6.1   | 6.47  | 6.77  | 5.82  | -2.5  |
| Rtn4                   | 5.76  | 6.25  | 6.7   | 5.86  | -2.5  |
|                        | 5.04  | 5.86  | 6.04  | 5.53  | -2.5  |
| Gm3934                 | 5.78  | 5.62  | 6.66  | 5.18  | -2.5  |
| LOC100861805           | 5     | 4.95  | 6.26  | 4.89  | -2.5  |
| Kif1b                  | 6.59  | 6.72  | 7.4   | 6.21  | -2.49 |
| Peg3os                 | 6.79  | 6.92  | 7.81  | 6.62  | -2.49 |
|                        | 7.51  | 7.83  | 7.91  | 6.91  | -2.49 |
|                        | 8.31  | 7.57  | 8.73  | 6.67  | -2.49 |
| Gm4804                 | 5.07  | 5.23  | 6.23  | 5.08  | -2.49 |
| Gm12912                | 6.3   | 6.56  | 6.79  | 5.73  | -2.49 |
| Gm6238                 | 5.46  | 5.61  | 6.2   | 5.03  | -2.49 |
| Capza1                 | 5.73  | 5.67  | 6.7   | 5.33  | -2.48 |
| Dnajc4                 | 4.6   | 4.73  | 5.62  | 4.44  | -2.48 |
| Eef1a2                 | 5.97  | 6.78  | 6.82  | 6.31  | -2.48 |
| Lonp2                  | 4.88  | 5.07  | 6.07  | 4.94  | -2.48 |
| Ufd11                  | 4.96  | 4.78  | 5.87  | 4.38  | -2.48 |
|                        | 4.38  | 4.62  | 5.43  | 4.37  | -2.48 |
|                        | 3.39  | 4.46  | 3.9   | 3.66  | -2.48 |
| Gm16100                | 4.73  | 4.95  | 5.48  | 4.39  | -2.48 |
| Gm5436                 | 5.76  | 5.99  | 6.91  | 5.82  | -2.48 |
| Rcor3                  | 3.73  | 4.36  | 4.38  | 3.7   | -2.47 |
| Tspyl4                 | 5.86  | 6.21  | 6.81  | 5.86  | -2.47 |
| Gm16238                | 5.42  | 5.77  | 6.46  | 5.51  | -2.47 |
| Lin7a                  | 4.95  | 5.3   | 6.16  | 5.22  | -2.46 |
| Slc48a1                | 5.4   | 5.82  | 5.59  | 4.71  | -2.46 |
| Gm14944; RP23-302B23.2 | 5.02  | 5.02  | 6.14  | 4.84  | -2.46 |
| Mertk                  | 5.38  | 5.61  | 6.09  | 5.03  | -2.45 |
| Sdhb                   | 4.26  | 4.46  | 5.38  | 4.29  | -2.45 |
|                        | 4.05  | 4.69  | 4.4   | 3.75  | -2.44 |
| Gm8412                 | 4.56  | 4.85  | 5.28  | 4.28  | -2.44 |
| Cdh5                   | 5.12  | 5.59  | 5.98  | 5.16  | -2.43 |
| Gm13149                | 5.02  | 5.56  | 5.88  | 5.14  | -2.43 |



|              |       |       |       |       |       |
|--------------|-------|-------|-------|-------|-------|
| Wnk1         | 6.15  | 6.32  | 6.9   | 5.8   | -2.42 |
|              | 10.26 | 11.03 | 10.99 | 10.49 | -2.42 |
| Gm13695      | 4.04  | 4.84  | 4.57  | 4.09  | -2.42 |
| Amd-ps3      | 5.42  | 5.48  | 6.23  | 5.02  | -2.42 |
| Aplp1        | 6.41  | 7.02  | 6.99  | 6.33  | -2.41 |
| Sacm11       | 4.57  | 4.8   | 5.22  | 4.19  | -2.41 |
| Gm14571      | 4.04  | 4.63  | 4.39  | 3.71  | -2.41 |
| Krit1        | 4.58  | 5     | 5.38  | 4.54  | -2.4  |
| Lynx1        | 3.91  | 4.35  | 4.57  | 3.75  | -2.4  |
| Gm12719      | 4.17  | 4.89  | 4.71  | 4.17  | -2.4  |
| Tnfaip1      | 5.03  | 5.39  | 5.96  | 5.07  | -2.39 |
|              | 4.29  | 4.94  | 4.9   | 4.29  | -2.39 |
| Gm13144      | 5.26  | 5.32  | 6.15  | 4.95  | -2.39 |
| LOC100861832 | 4.13  | 3.98  | 5.59  | 4.19  | -2.39 |
| Srsf7        | 5.85  | 5.7   | 6.39  | 4.99  | -2.38 |
|              | 7.53  | 7.87  | 8.34  | 7.43  | -2.38 |
|              | 5.34  | 4.51  | 6.32  | 4.24  | -2.38 |
| Gm12281      | 4.56  | 5.72  | 5     | 4.92  | -2.38 |
| Gm12460      | 6.97  | 7.12  | 8.08  | 6.98  | -2.38 |
| Eif1         | 7.07  | 7.38  | 7.9   | 6.96  | -2.37 |
|              | 14.72 | 14.69 | 15.51 | 14.23 | -2.37 |
|              | 3.92  | 4.34  | 4.81  | 3.98  | -2.37 |
|              | 5.14  | 6.08  | 5.32  | 5.01  | -2.37 |
| Agk          | 3.91  | 4.15  | 4.85  | 3.85  | -2.36 |
| Gm6612       | 4.56  | 4.8   | 5.53  | 4.53  | -2.36 |
| Gm8864       | 8.43  | 9.33  | 9.03  | 8.69  | -2.36 |
| Gm13693      | 4.02  | 4.72  | 4.5   | 3.96  | -2.36 |
| Gm13694      | 4.02  | 4.72  | 4.5   | 3.96  | -2.36 |
| Gm13696      | 4.02  | 4.72  | 4.5   | 3.96  | -2.36 |
| Gm13697      | 4.02  | 4.72  | 4.5   | 3.96  | -2.36 |
| Gm13698      | 4.02  | 4.72  | 4.5   | 3.96  | -2.36 |
| Fam195b      | 4.45  | 5.07  | 4.98  | 4.37  | -2.35 |
| Fads1        | 5.61  | 6.13  | 6.21  | 5.49  | -2.35 |
| Plxnc1       | 4.23  | 4.45  | 5.25  | 4.24  | -2.35 |
| Slc18b1      | 4.55  | 4.38  | 5.77  | 4.37  | -2.35 |
|              | 3.83  | 4.39  | 4.89  | 4.21  | -2.35 |
| LOC100862386 | 4.18  | 5.06  | 5.28  | 4.94  | -2.35 |
| Gm2163       | 5.87  | 6.47  | 6.75  | 6.12  | -2.34 |
| Gm12704      | 5.21  | 5.27  | 5.77  | 4.6   | -2.34 |
| Gm23215      | 13.93 | 14.02 | 14.22 | 13.08 | -2.34 |
| Map4k3       | 5.74  | 6.15  | 6.64  | 5.83  | -2.33 |
|              | 5.67  | 6.08  | 6.19  | 5.39  | -2.32 |
| Cdh2         | 5.52  | 6.12  | 6.28  | 5.68  | -2.31 |
| Gtf2i        | 5.72  | 6.16  | 6.03  | 5.26  | -2.31 |

|              |       |       |       |       |       |
|--------------|-------|-------|-------|-------|-------|
| Tmem38a      | 5.82  | 6.19  | 5.98  | 5.14  | -2.31 |
|              | 5.9   | 6.67  | 6.73  | 6.3   | -2.31 |
|              | 8.16  | 9.25  | 9.23  | 9.11  | -2.31 |
|              | 4.86  | 4.91  | 5.29  | 4.13  | -2.31 |
|              | 5.82  | 5.62  | 6.08  | 4.67  | -2.31 |
| Gm12226      | 4.51  | 4.65  | 5.21  | 4.14  | -2.31 |
| Ndufv3       | 7.29  | 7.3   | 7.95  | 6.77  | -2.3  |
| Gm5473       | 9.59  | 9.82  | 9.48  | 8.51  | -2.3  |
| Mir669b      | 5.5   | 5.04  | 6.33  | 4.67  | -2.29 |
|              | 3.96  | 4.5   | 4.12  | 3.47  | -2.29 |
| Hist2h4      | 5.21  | 5.94  | 6.73  | 6.27  | -2.28 |
| Mrpl24       | 6.46  | 6.51  | 7.24  | 6.1   | -2.28 |
| Rpl6         | 5.3   | 5.95  | 5.94  | 5.41  | -2.28 |
| Gm6788       | 8.68  | 9.13  | 9.22  | 8.49  | -2.28 |
| Gm22694      | 10.31 | 10.17 | 10.63 | 9.3   | -2.28 |
| Pitpna       | 6.22  | 6.26  | 6.85  | 5.7   | -2.27 |
|              | 6.8   | 7.07  | 7.08  | 6.17  | -2.27 |
| Gm7985       | 8.23  | 9.04  | 8.82  | 8.45  | -2.27 |
| Larp4b       | 5.6   | 6.06  | 6.24  | 5.53  | -2.26 |
| March6       | 4.96  | 5.09  | 5.7   | 4.65  | -2.26 |
| Syn1         | 4.49  | 4.89  | 5.51  | 4.73  | -2.26 |
| Uso1         | 4.99  | 5.54  | 5.38  | 4.76  | -2.26 |
|              | 4.89  | 5.51  | 5.66  | 5.1   | -2.26 |
|              | 4.04  | 4.17  | 4.94  | 3.89  | -2.26 |
| Gm3715       | 4.98  | 5.82  | 5.19  | 4.86  | -2.26 |
| LOC100862073 | 6.68  | 6.77  | 7.46  | 6.38  | -2.26 |
| Rpl23a-ps4   | 4.17  | 4.54  | 4.99  | 4.18  | -2.26 |
| AK029949     | 5.46  | 6.09  | 6.21  | 5.66  | -2.26 |
| Bnip2        | 6.22  | 6.01  | 6.69  | 5.31  | -2.25 |
| Kif5c        | 6.65  | 7.06  | 7.18  | 6.41  | -2.25 |
| Mff          | 5.22  | 5.33  | 6.02  | 4.95  | -2.25 |
| Naa30        | 4.97  | 5.47  | 5.57  | 4.89  | -2.25 |
| Gm6644       | 5.19  | 4.94  | 5.87  | 4.46  | -2.25 |
| Gm4879       | 4.5   | 4.89  | 5.4   | 4.62  | -2.25 |
| Tmem59l      | 4.42  | 5.17  | 5.38  | 4.97  | -2.24 |
| Gm9143       | 7.72  | 7.7   | 8.26  | 7.08  | -2.24 |
| Gm14107      | 5.62  | 6.25  | 6.33  | 5.8   | -2.24 |
| Elovl4       | 4.28  | 4.32  | 5.13  | 4.02  | -2.23 |
| Gm25872      | 16.28 | 16.82 | 16.9  | 16.29 | -2.23 |
| Jag1         | 4.66  | 4.46  | 5.85  | 4.5   | -2.22 |
| Med30        | 4.1   | 4.55  | 4.91  | 4.22  | -2.22 |
|              | 3.52  | 4.77  | 3.76  | 3.86  | -2.22 |
|              | 4.07  | 4.48  | 5.11  | 4.37  | -2.22 |
| Gm12632      | 7.86  | 7.81  | 8.52  | 7.31  | -2.22 |

|              |       |       |       |       |       |
|--------------|-------|-------|-------|-------|-------|
| Gm13545      | 6.15  | 6.33  | 6.76  | 5.79  | -2.22 |
| Gm19938      | 4.08  | 4.41  | 4.97  | 4.15  | -2.22 |
| Hey2         | 4.51  | 4.74  | 5.51  | 4.58  | -2.21 |
| Hbs11        | 4.85  | 5.21  | 5.29  | 4.51  | -2.21 |
| Gm6245       | 3.76  | 4.09  | 4.86  | 4.05  | -2.21 |
| Efnb2        | 5.7   | 6.58  | 5.96  | 5.7   | -2.2  |
| Emsy         | 5.73  | 6.54  | 6.16  | 5.83  | -2.2  |
|              | 5.75  | 5.9   | 6.29  | 5.31  | -2.2  |
|              | 4.68  | 4.94  | 5.82  | 4.94  | -2.2  |
| Gm24108      | 11.29 | 11.89 | 11.71 | 11.17 | -2.2  |
| Rabl2        | 5.79  | 6.45  | 5.81  | 5.34  | -2.19 |
| Uck2         | 4.71  | 4.92  | 6.08  | 5.17  | -2.19 |
| Gm14639      | 5.36  | 5.88  | 5.58  | 4.97  | -2.19 |
|              | 7.85  | 8.15  | 9.25  | 8.42  | -2.18 |
| Actr2        | 8.96  | 9.34  | 8.78  | 8.04  | -2.18 |
| Gpi1         | 7.28  | 7.37  | 7.95  | 6.92  | -2.18 |
| Timm23       | 4.83  | 5.41  | 5.61  | 5.07  | -2.18 |
| Uqcrc1       | 5.06  | 5.45  | 6.02  | 5.28  | -2.18 |
| Gm13009      | 4.03  | 4.56  | 4.39  | 3.79  | -2.18 |
| Gm13436      | 4.3   | 4.1   | 5.57  | 4.25  | -2.18 |
| Dis3         | 4.68  | 4.87  | 5.41  | 4.48  | -2.17 |
| Pcyox1       | 5.73  | 5.66  | 6.64  | 5.45  | -2.17 |
| Clec1a       | 4.2   | 4.39  | 5.14  | 4.22  | -2.16 |
| Large        | 5.47  | 5.82  | 6.19  | 5.44  | -2.16 |
| Mrpl49       | 4.3   | 4.73  | 5.11  | 4.43  | -2.16 |
|              | 4.39  | 4.66  | 5     | 4.15  | -2.16 |
| Ighv3-5      | 3.37  | 4.3   | 3.59  | 3.41  | -2.15 |
| Atp5g3       | 5.82  | 5.81  | 6.32  | 5.21  | -2.15 |
| Cacybp       | 4.81  | 5.07  | 5.4   | 4.56  | -2.15 |
| Dap3         | 4.63  | 4.74  | 5.67  | 4.67  | -2.15 |
| Entpd1       | 5.01  | 5.2   | 5.77  | 4.86  | -2.15 |
| Fnta         | 4.39  | 4.71  | 5.2   | 4.41  | -2.15 |
| Ppp6c        | 5.46  | 5.37  | 6.04  | 4.85  | -2.15 |
|              | 4.6   | 5.39  | 5.13  | 4.81  | -2.15 |
| Gm6505       | 4.94  | 5.84  | 4.49  | 4.29  | -2.15 |
| Gm1974       | 4.47  | 4.6   | 5.49  | 4.52  | -2.15 |
| LOC100862145 | 6.29  | 6.25  | 7.1   | 5.96  | -2.15 |
| AY036118     | 8.55  | 7.91  | 9.65  | 7.92  | -2.14 |
| Kat6a        | 5.29  | 5.57  | 5.55  | 4.74  | -2.14 |
| Plekhb2      | 4.85  | 5.28  | 5.26  | 4.6   | -2.14 |
| Rsl24d1      | 5.31  | 5.95  | 5.7   | 5.24  | -2.14 |
| Tm4sf1       | 6.24  | 6.1   | 6.81  | 5.57  | -2.14 |
| Gm13345      | 4.19  | 5.29  | 4.14  | 4.14  | -2.14 |
| Cuta         | 4.78  | 5.19  | 5.48  | 4.8   | -2.13 |

|                |       |      |       |       |       |
|----------------|-------|------|-------|-------|-------|
| Ezh1           | 7.49  | 7.39 | 8.02  | 6.83  | -2.13 |
| Rpl37rt        | 7.65  | 8.04 | 8.17  | 7.46  | -2.13 |
| Rpl31-ps7      | 9.2   | 9.13 | 9.05  | 7.89  | -2.13 |
| Csrnp3         | 5.14  | 5.66 | 5.51  | 4.95  | -2.12 |
| Ncl            | 6.98  | 6.59 | 7.67  | 6.2   | -2.12 |
| Ogfrl1         | 5.38  | 5.39 | 5.94  | 4.87  | -2.12 |
|                | 10.41 | 10.7 | 10.71 | 9.91  | -2.12 |
|                | 4.03  | 4.7  | 4.55  | 4.14  | -2.12 |
|                | 5.03  | 5.01 | 5.44  | 4.33  | -2.12 |
| Gm14176        | 4.22  | 4.33 | 5.27  | 4.31  | -2.12 |
| Gm15981        | 4.57  | 4.98 | 4.94  | 4.27  | -2.12 |
| Gm24328        | 3.73  | 4.06 | 4.44  | 3.69  | -2.12 |
| Gm9386         | 5.65  | 6.61 | 5.93  | 5.81  | -2.12 |
| Rpl31-ps6      | 7.27  | 7.8  | 7.39  | 6.84  | -2.12 |
| Dusp11         | 6.1   | 6.56 | 6.18  | 5.56  | -2.11 |
| Gm3317; Gm3488 | 5.39  | 6.03 | 5.59  | 5.14  | -2.11 |
| Pgm211         | 5.99  | 6.78 | 7.11  | 6.83  | -2.1  |
| Vcl            | 4.84  | 5.21 | 5.27  | 4.57  | -2.1  |
| Gm14516        | 5.06  | 5.28 | 5.96  | 5.11  | -2.1  |
| Gm15531        | 4.88  | 5.52 | 5.53  | 5.1   | -2.1  |
| 4933409K07Rik  | 5.52  | 6.16 | 6.21  | 5.78  | -2.09 |
| Anxa6          | 4.77  | 4.77 | 5.53  | 4.47  | -2.09 |
| Atp1a1         | 8.32  | 8.6  | 9.23  | 8.46  | -2.09 |
| Prkaa1         | 4.29  | 4.74 | 4.9   | 4.28  | -2.09 |
| Rnf25          | 4.75  | 5.3  | 5.34  | 4.83  | -2.09 |
| Sirt2          | 6.38  | 7    | 7.11  | 6.66  | -2.09 |
| Eprs           | 5.86  | 5.94 | 6.58  | 5.61  | -2.08 |
| Tnpo3          | 4.9   | 5.16 | 5.56  | 4.77  | -2.08 |
| Gm7927         | 3.57  | 4.33 | 4.15  | 3.85  | -2.08 |
| Gm12492        | 5.85  | 6.04 | 6.48  | 5.61  | -2.08 |
| Akap8l         | 7.22  | 7.21 | 7.73  | 6.67  | -2.07 |
| Rpl10; Snora70 | 4.62  | 4.97 | 5.54  | 4.84  | -2.07 |
|                | 4.34  | 5.26 | 4.96  | 4.83  | -2.07 |
|                | 4.99  | 5.37 | 5.95  | 5.28  | -2.07 |
| Gm12447        | 6.42  | 6.74 | 6.63  | 5.91  | -2.07 |
| Gm15378        | 3.83  | 4.52 | 4.18  | 3.81  | -2.07 |
| Gm19650        | 4.89  | 5.97 | 4.88  | 4.91  | -2.07 |
| Cbx3-ps7       | 6.12  | 6.36 | 6.31  | 5.51  | -2.06 |
| Gnai2          | 7.15  | 6.94 | 7.73  | 6.48  | -2.06 |
| Ncor1          | 7.15  | 7.44 | 7.3   | 6.55  | -2.06 |
| Ppp1r16b       | 6.15  | 6.83 | 6.41  | 6.05  | -2.06 |
| Gm16082        | 4.14  | 4.7  | 4.54  | 4.05  | -2.06 |
| Gm24139        | 18.46 | 18.5 | 18.46 | 17.45 | -2.06 |
| Prelid1        | 5.24  | 5.09 | 6.08  | 4.89  | -2.05 |

|                                        |      |      |      |      |       |
|----------------------------------------|------|------|------|------|-------|
| Tnks2                                  | 5.72 | 5.94 | 6.31 | 5.5  | -2.05 |
| Rbfox2                                 | 5.56 | 5.83 | 6.11 | 5.36 | -2.04 |
| Zfp871                                 | 5.26 | 5.54 | 5.51 | 4.77 | -2.04 |
|                                        | 4.23 | 4.56 | 4.79 | 4.1  | -2.04 |
| Aldoc                                  | 6.58 | 7.02 | 7.42 | 6.83 | -2.03 |
| Gba                                    | 5.46 | 5.72 | 6.6  | 5.84 | -2.03 |
| Nsf                                    | 6.04 | 6.28 | 6.77 | 5.99 | -2.03 |
|                                        | 5.06 | 4.56 | 6.41 | 4.89 | -2.03 |
|                                        | 4.11 | 4.22 | 4.6  | 3.69 | -2.03 |
| Gm6736                                 | 4.18 | 4.75 | 4.39 | 3.93 | -2.03 |
| Agrn                                   | 5.91 | 6.03 | 6.45 | 5.56 | -2.02 |
| Clasp2                                 | 5.17 | 5.29 | 5.92 | 5.03 | -2.02 |
| Puf60                                  | 5.99 | 5.85 | 6.75 | 5.6  | -2.02 |
| Slc24a2                                | 6.24 | 6.49 | 6.47 | 5.71 | -2.02 |
| LOC100862033                           | 4.84 | 5.66 | 5.35 | 5.17 | -2.02 |
|                                        | 4.26 | 4.89 | 4.81 | 4.44 | -2.01 |
| Gm22194                                | 4.85 | 4.9  | 5.37 | 4.42 | -2.01 |
| 1700020I14Rik                          | 6.38 | 6.1  | 6.97 | 5.69 | -2    |
| LOC100861762                           | 4.38 | 4.21 | 5.21 | 4.04 | -2    |
| Olf350                                 | 3.67 | 3.47 | 3.32 | 4.12 | 2     |
|                                        | 4.11 | 3.63 | 3.71 | 4.23 | 2     |
|                                        | 3.84 | 3.55 | 3.45 | 4.16 | 2     |
|                                        | 4.16 | 3.74 | 3.98 | 4.56 | 2     |
|                                        | 4.11 | 3.62 | 3.63 | 4.14 | 2     |
| Gm10807                                | 4.09 | 3.39 | 3.43 | 3.74 | 2     |
| Rpl15-ps4                              | 3.96 | 3.57 | 3.52 | 4.13 | 2     |
| Serpina3d-ps                           | 4.13 | 3.48 | 3.51 | 3.86 | 2     |
|                                        | 5.05 | 4.61 | 4.65 | 5.21 | 2.01  |
|                                        | 3.81 | 3.65 | 3.56 | 4.41 | 2.01  |
|                                        | 3.74 | 3.66 | 3.5  | 4.42 | 2.01  |
|                                        | 3.67 | 3.6  | 3.5  | 4.44 | 2.01  |
|                                        | 4.16 | 3.68 | 3.61 | 4.13 | 2.01  |
|                                        | 4.8  | 4.34 | 3.93 | 4.47 | 2.01  |
|                                        | 4.11 | 3.55 | 3.39 | 3.83 | 2.01  |
|                                        | 4.49 | 4.52 | 3.96 | 4.99 | 2.01  |
|                                        | 4.05 | 3.74 | 3.69 | 4.38 | 2.01  |
|                                        | 5.28 | 4.19 | 4.44 | 4.36 | 2.01  |
|                                        | 4.26 | 4.07 | 3.81 | 4.63 | 2.01  |
|                                        | 6.34 | 6.05 | 5.64 | 6.36 | 2.01  |
| Gm24899;<br>Gm26945; RP23-<br>204I16.2 | 5.15 | 4.52 | 4.81 | 5.2  | 2.01  |
| Mir6353                                | 4.84 | 4.63 | 4.57 | 5.38 | 2.02  |
| 1700063A18Rik                          | 4.23 | 3.82 | 3.63 | 4.23 | 2.02  |

|                           |      |      |      |      |      |
|---------------------------|------|------|------|------|------|
|                           | 5.87 | 5.7  | 5.28 | 6.13 | 2.02 |
|                           | 3.95 | 3.65 | 3.69 | 4.4  | 2.02 |
|                           | 4.66 | 4.44 | 4.02 | 4.82 | 2.02 |
|                           | 4.23 | 3.61 | 3.45 | 3.84 | 2.02 |
| Gm15135;<br>AC123830.11   | 4.38 | 3.63 | 3.68 | 3.95 | 2.02 |
| Mirlet7g                  | 4.06 | 3.65 | 3.31 | 3.91 | 2.03 |
|                           | 3.84 | 3.78 | 3.46 | 4.42 | 2.03 |
|                           | 4.82 | 4.15 | 4.39 | 4.75 | 2.03 |
|                           | 4.63 | 3.97 | 4.11 | 4.46 | 2.03 |
|                           | 4.15 | 3.71 | 3.77 | 4.35 | 2.03 |
|                           | 4.82 | 4.14 | 4.05 | 4.39 | 2.03 |
|                           | 4.35 | 4.12 | 3.5  | 4.3  | 2.03 |
|                           | 4.51 | 4.17 | 4    | 4.68 | 2.03 |
|                           | 4.2  | 3.75 | 3.6  | 4.16 | 2.03 |
|                           | 3.98 | 3.72 | 3.72 | 4.48 | 2.03 |
|                           | 5.98 | 5.34 | 5.73 | 6.12 | 2.03 |
|                           | 4.21 | 4.06 | 3.83 | 4.7  | 2.03 |
|                           | 4.28 | 3.77 | 3.93 | 4.44 | 2.03 |
|                           | 3.87 | 3.49 | 3.48 | 4.12 | 2.03 |
| Gm11417; RP23-<br>397J5.2 | 5.65 | 4.97 | 4.88 | 5.22 | 2.03 |
| Gm20543                   | 4.13 | 3.65 | 3.53 | 4.08 | 2.03 |
| Gm25418                   | 6.23 | 6    | 5.68 | 6.47 | 2.03 |
|                           | 3.72 | 3.42 | 3.71 | 4.44 | 2.04 |
|                           | 4.98 | 4.61 | 4.59 | 5.25 | 2.04 |
|                           | 4.08 | 3.68 | 3.32 | 3.94 | 2.04 |
|                           | 4.46 | 4.14 | 4.15 | 4.85 | 2.04 |
|                           | 8.49 | 8.08 | 7.89 | 8.51 | 2.04 |
|                           | 5.78 | 4.66 | 4.99 | 4.9  | 2.04 |
| Gm22791                   | 4.63 | 4.44 | 4.28 | 5.11 | 2.04 |
| Gm23421                   | 4    | 3.63 | 3.65 | 4.31 | 2.04 |
| Mir1947                   | 5.14 | 4.34 | 4.34 | 4.58 | 2.05 |
|                           | 5.1  | 4.4  | 4.41 | 4.75 | 2.05 |
|                           | 4.24 | 3.83 | 3.98 | 4.61 | 2.05 |
|                           | 4.39 | 4.29 | 3.79 | 4.72 | 2.05 |
|                           | 4.01 | 3.77 | 3.29 | 4.09 | 2.05 |
| Gm23125                   | 4.08 | 3.94 | 3.95 | 4.84 | 2.05 |
| Gm23274                   | 5    | 4.61 | 4.49 | 5.14 | 2.05 |
| Gm24113                   | 4.06 | 3.71 | 3.53 | 4.23 | 2.05 |
| Gm26361                   | 4.98 | 4.33 | 3.93 | 4.32 | 2.05 |
| Mir7081                   | 6.83 | 6.36 | 6.01 | 6.59 | 2.06 |
|                           | 6.64 | 5.96 | 5.86 | 6.22 | 2.06 |
| Svs3b                     | 3.87 | 3.57 | 3.46 | 4.21 | 2.06 |

|                       |      |      |      |      |      |
|-----------------------|------|------|------|------|------|
|                       | 4.15 | 3.98 | 3.79 | 4.65 | 2.06 |
|                       | 5.11 | 4.95 | 4.6  | 5.48 | 2.06 |
|                       | 5.1  | 4.26 | 4.42 | 4.63 | 2.06 |
|                       | 3.71 | 3.61 | 3.36 | 4.3  | 2.06 |
|                       | 4.97 | 4.03 | 4.19 | 4.3  | 2.06 |
| Gm11882               | 4.24 | 3.73 | 3.81 | 4.34 | 2.06 |
| Gm12909; RP23-339M2.1 | 4.06 | 3.85 | 3.49 | 4.33 | 2.06 |
| Gm15168               | 4.35 | 3.65 | 3.53 | 3.88 | 2.06 |
| Gm15488               | 3.76 | 3.63 | 3.46 | 4.37 | 2.06 |
| Gm24490               | 4.17 | 3.4  | 3.75 | 4.02 | 2.06 |
| Gm25838               | 4.39 | 4.05 | 3.76 | 4.46 | 2.06 |
|                       | 5.62 | 5.25 | 4.83 | 5.51 | 2.07 |
| Gm10512               | 4.21 | 3.96 | 4.01 | 4.81 | 2.07 |
|                       | 3.99 | 3.64 | 3.6  | 4.3  | 2.07 |
|                       | 3.81 | 3.56 | 3.47 | 4.26 | 2.07 |
| Gm11257               | 3.73 | 3.56 | 3.37 | 4.25 | 2.07 |
| Gm12638               | 5.22 | 4.56 | 4.67 | 5.06 | 2.07 |
| Gm15749; AC125183.7   | 4    | 3.75 | 3.4  | 4.2  | 2.07 |
|                       | 3.75 | 3.35 | 3.46 | 4.12 | 2.08 |
|                       | 3.95 | 3.74 | 3.8  | 4.64 | 2.08 |
|                       | 4.05 | 3.73 | 3.65 | 4.39 | 2.08 |
|                       | 6.26 | 5.51 | 5.45 | 5.75 | 2.08 |
| Gm12584               | 4.2  | 3.79 | 3.43 | 4.08 | 2.08 |
| Gm17739               | 4.33 | 3.69 | 3.77 | 4.18 | 2.08 |
| Olfr248               | 4.04 | 3.45 | 3.5  | 3.97 | 2.09 |
| Olfr1509              | 3.76 | 3.44 | 3.41 | 4.16 | 2.09 |
| Olfr1506              | 4.05 | 3.75 | 3.67 | 4.44 | 2.09 |
|                       | 4.44 | 4.05 | 3.7  | 4.38 | 2.09 |
|                       | 4.51 | 3.7  | 4.31 | 4.57 | 2.09 |
|                       | 4.46 | 3.67 | 3.82 | 4.09 | 2.09 |
|                       | 4.19 | 3.84 | 3.57 | 4.29 | 2.09 |
|                       | 4.38 | 3.87 | 3.9  | 4.45 | 2.09 |
|                       | 6.42 | 6.02 | 5.72 | 6.37 | 2.09 |
|                       | 5.79 | 4.92 | 5.32 | 5.51 | 2.09 |
|                       | 4.54 | 3.9  | 3.76 | 4.18 | 2.09 |
| Gm20471; RP24-485J8.2 | 4.07 | 3.42 | 3.55 | 3.96 | 2.09 |
| Gm22257               | 3.91 | 3.48 | 3.45 | 4.09 | 2.09 |
| Rhox7b                | 5.54 | 5.21 | 4.81 | 5.54 | 2.09 |
| Ighv1-54              | 4.99 | 4.69 | 4.08 | 4.84 | 2.1  |
|                       | 3.88 | 3.51 | 3.79 | 4.48 | 2.1  |
|                       | 4.36 | 3.56 | 3.58 | 3.85 | 2.1  |

|                            |      |      |      |      |      |
|----------------------------|------|------|------|------|------|
|                            | 3.84 | 3.76 | 3.72 | 4.71 | 2.1  |
|                            | 4.75 | 3.48 | 3.92 | 3.72 | 2.1  |
|                            | 4.42 | 3.79 | 4.04 | 4.48 | 2.1  |
|                            | 3.73 | 3.61 | 3.36 | 4.32 | 2.1  |
|                            | 3.9  | 3.77 | 3.79 | 4.73 | 2.1  |
|                            | 4.92 | 4.54 | 3.91 | 4.59 | 2.1  |
|                            | 4.89 | 4.51 | 4.33 | 5.01 | 2.1  |
| Gm2930                     | 4.18 | 3.83 | 3.83 | 4.54 | 2.1  |
| Gm14999                    | 4.31 | 3.88 | 3.72 | 4.35 | 2.1  |
| Gm22764                    | 4.75 | 4.29 | 4.37 | 4.98 | 2.1  |
| Gm25776                    | 4.57 | 4.18 | 3.67 | 4.35 | 2.1  |
| Gm19935                    | 4.68 | 4.57 | 4.18 | 5.14 | 2.1  |
| LOC100861643               | 5.6  | 5.18 | 5.07 | 5.73 | 2.1  |
| 1700034J04Rik              | 3.83 | 3.37 | 3.29 | 3.9  | 2.1  |
| Mir7036                    | 5.5  | 4.81 | 4.76 | 5.15 | 2.11 |
|                            | 4.28 | 3.86 | 3.98 | 4.64 | 2.11 |
|                            | 3.83 | 3.45 | 3.43 | 4.13 | 2.11 |
|                            | 4.16 | 3.89 | 3.85 | 4.66 | 2.11 |
|                            | 3.98 | 3.57 | 3.48 | 4.15 | 2.11 |
|                            | 3.89 | 3.65 | 3.54 | 4.38 | 2.11 |
|                            | 4.22 | 4.18 | 3.83 | 4.86 | 2.11 |
| Gm3513;<br>AC113945.3      | 4.41 | 3.97 | 4.15 | 4.79 | 2.11 |
| Mir6928                    | 4.45 | 3.56 | 3.25 | 3.45 | 2.12 |
| Mir7033                    | 4.09 | 4.06 | 3.59 | 4.64 | 2.12 |
| Olfr125                    | 3.96 | 3.46 | 3.59 | 4.17 | 2.12 |
| Olfr1373                   | 4.21 | 3.73 | 3.77 | 4.38 | 2.12 |
|                            | 5.28 | 4.84 | 4.77 | 5.41 | 2.12 |
|                            | 4.27 | 4.04 | 3.47 | 4.34 | 2.12 |
|                            | 4.2  | 3.65 | 3.62 | 4.16 | 2.12 |
|                            | 7.15 | 6.77 | 6.57 | 7.27 | 2.12 |
|                            | 4.32 | 4.15 | 3.73 | 4.65 | 2.12 |
| n-R5s205                   | 4.52 | 4.58 | 3.81 | 4.95 | 2.12 |
| Gm9457                     | 8    | 7.44 | 7.52 | 8.05 | 2.12 |
| Gm12951; RP23-<br>276M23.2 | 4.87 | 4.33 | 4.55 | 5.11 | 2.12 |
| Gm25334                    | 3.91 | 3.72 | 3.6  | 4.5  | 2.12 |
| Mir155                     | 4.12 | 3.83 | 3.64 | 4.43 | 2.13 |
| Wdyhvl                     | 4.78 | 3.86 | 3.89 | 4.07 | 2.13 |
|                            | 6.53 | 6.2  | 5.66 | 6.42 | 2.13 |
|                            | 4.48 | 3.84 | 3.92 | 4.37 | 2.13 |
| Gm12577                    | 4.52 | 3.77 | 4.5  | 4.85 | 2.13 |
| Gm22649                    | 4.91 | 4.53 | 4.45 | 5.16 | 2.13 |
| Gm25488                    | 4.3  | 3.57 | 3.57 | 3.94 | 2.13 |



|                        |      |      |      |      |      |
|------------------------|------|------|------|------|------|
| Ranbp2-ps9             | 4.86 | 4.21 | 4.05 | 4.49 | 2.13 |
| Mir3086                | 4.26 | 3.57 | 3.38 | 3.79 | 2.14 |
| 3930402G23Rik          | 4.16 | 3.95 | 3.75 | 4.64 | 2.14 |
|                        | 3.81 | 3.72 | 3.37 | 4.37 | 2.14 |
|                        | 4.13 | 4.02 | 3.63 | 4.62 | 2.14 |
|                        | 4.4  | 4.18 | 3.96 | 4.84 | 2.14 |
| Gm11680; RP23-173A8.2  | 4.26 | 3.83 | 3.86 | 4.53 | 2.14 |
| Gm12195; RP23-319B15.6 | 4.76 | 4.33 | 4.21 | 4.88 | 2.14 |
|                        | 4.16 | 3.82 | 3.68 | 4.44 | 2.15 |
|                        | 3.64 | 3.3  | 3.34 | 4.1  | 2.15 |
|                        | 4.75 | 4.21 | 4.25 | 4.82 | 2.15 |
| Gm11313                | 5.65 | 4.95 | 5.04 | 5.44 | 2.15 |
| Gm25130                | 5.06 | 4.44 | 4.62 | 5.11 | 2.15 |
| Ranbp2-ps2             | 4.67 | 4.17 | 3.66 | 4.26 | 2.15 |
|                        | 4.67 | 4.39 | 4.1  | 4.94 | 2.16 |
|                        | 3.69 | 3.27 | 3.27 | 3.96 | 2.16 |
| Olfir719-ps            | 4.31 | 3.65 | 3.69 | 4.14 | 2.16 |
| Prdx6-ps2              | 4.41 | 3.76 | 3.58 | 4.04 | 2.16 |
| Gm27530                | 7.64 | 7.6  | 6.97 | 8.04 | 2.16 |
| Mir7094-1              | 4.33 | 3.86 | 3.66 | 4.32 | 2.17 |
|                        | 5.06 | 4.16 | 4.22 | 4.44 | 2.17 |
|                        | 4.27 | 4.02 | 3.59 | 4.46 | 2.17 |
|                        | 4.3  | 3.96 | 3.82 | 4.6  | 2.17 |
| Gm14330; AC124590.1    | 3.83 | 3.75 | 3.69 | 4.73 | 2.17 |
| Gm15166                | 4.61 | 4.28 | 4.1  | 4.9  | 2.17 |
| Gm25005                | 5.26 | 4.57 | 4.79 | 5.22 | 2.17 |
| Gm26556; RP23-175C13.5 | 4.9  | 4.26 | 4.43 | 4.91 | 2.17 |
| 1700010B13Rik          | 4.47 | 4.29 | 3.83 | 4.76 | 2.17 |
| 5430401H09Rik          | 3.81 | 3.53 | 3.21 | 4.05 | 2.17 |
| Olfir437               | 5.19 | 4.7  | 4.24 | 4.88 | 2.18 |
| Olfir1030              | 3.85 | 3.4  | 3.41 | 4.08 | 2.18 |
| Rnase2b                | 4.17 | 3.67 | 3.69 | 4.32 | 2.18 |
|                        | 3.92 | 3.52 | 3.65 | 4.38 | 2.18 |
|                        | 4    | 3.36 | 3.43 | 3.92 | 2.18 |
| Gm12054; RP23-16B24.1  | 5.52 | 5.27 | 4.56 | 5.44 | 2.18 |
| Magea2                 | 5.12 | 4.44 | 4.58 | 5.02 | 2.19 |
|                        | 4.68 | 3.96 | 4.15 | 4.56 | 2.19 |
|                        | 3.66 | 3.4  | 3.3  | 4.18 | 2.19 |
|                        | 4.31 | 4.11 | 3.92 | 4.86 | 2.19 |

|               |       |      |       |       |      |
|---------------|-------|------|-------|-------|------|
|               | 4.71  | 3.62 | 4.11  | 4.15  | 2.19 |
|               | 4.04  | 3.74 | 3.45  | 4.28  | 2.19 |
|               | 4.47  | 4.17 | 3.75  | 4.58  | 2.19 |
|               | 4.59  | 4.05 | 3.95  | 4.55  | 2.19 |
|               | 4.15  | 3.7  | 3.65  | 4.34  | 2.2  |
|               | 4.24  | 3.87 | 3.91  | 4.68  | 2.2  |
|               | 6.56  | 5.42 | 5.93  | 5.93  | 2.2  |
|               | 5.4   | 5.14 | 4.74  | 5.62  | 2.2  |
|               | 4.55  | 3.92 | 4.01  | 4.52  | 2.2  |
| Gm14398       | 9.96  | 9    | 9.18  | 9.36  | 2.2  |
|               | 10.97 | 10.4 | 10.01 | 10.59 | 2.21 |
|               | 10.97 | 10.4 | 10.01 | 10.59 | 2.21 |
| Olfr145       | 3.75  | 3.61 | 3.62  | 4.63  | 2.21 |
|               | 4.36  | 3.87 | 4.14  | 4.8   | 2.21 |
|               | 3.84  | 3.57 | 3.41  | 4.28  | 2.21 |
|               | 5.13  | 4.75 | 4.34  | 5.1   | 2.21 |
| Gm15833       | 3.95  | 3.79 | 3.77  | 4.76  | 2.21 |
|               | 3.91  | 4.13 | 2.88  | 4.24  | 2.22 |
| 1700109G15Rik | 5.57  | 4.97 | 4.96  | 5.52  | 2.22 |
|               | 7.73  | 7.47 | 6.86  | 7.76  | 2.22 |
|               | 4.26  | 3.8  | 4.19  | 4.87  | 2.22 |
|               | 4.08  | 3.96 | 3.47  | 4.5   | 2.22 |
|               | 11.03 | 10.9 | 10.35 | 11.37 | 2.22 |
| Gm15211       | 4.84  | 4.29 | 4.18  | 4.79  | 2.22 |
| Gm23456       | 5.5   | 4.83 | 4.83  | 5.32  | 2.22 |
| Gm24392       | 4.05  | 3.73 | 3.47  | 4.31  | 2.22 |
| Gm24921       | 3.52  | 3.71 | 3.46  | 4.79  | 2.22 |
|               | 4.26  | 3.48 | 3.57  | 3.95  | 2.23 |
|               | 4.49  | 3.8  | 3.87  | 4.34  | 2.23 |
|               | 3.79  | 3.36 | 3.44  | 4.17  | 2.23 |
|               | 4.52  | 4.31 | 4     | 4.95  | 2.23 |
|               | 4.41  | 3.79 | 3.85  | 4.38  | 2.23 |
| Gm22578       | 4.11  | 3.57 | 3.93  | 4.56  | 2.23 |
| Gm26187       | 4.15  | 3.9  | 3.89  | 4.8   | 2.23 |
|               | 3.89  | 3.66 | 3.88  | 4.81  | 2.24 |
| Spata31d1b    | 5.28  | 5.16 | 4.71  | 5.76  | 2.24 |
|               | 4.29  | 3.63 | 3.74  | 4.23  | 2.24 |
|               | 8.21  | 7.53 | 7.85  | 8.33  | 2.24 |
|               | 5.24  | 4.75 | 4.64  | 5.31  | 2.24 |
|               | 4.17  | 3.77 | 3.53  | 4.3   | 2.24 |
|               | 5.01  | 4.24 | 4.26  | 4.65  | 2.24 |
| Gm12740       | 4.47  | 3.99 | 3.95  | 4.62  | 2.24 |
| Gm22713       | 4.87  | 4.65 | 4.45  | 5.4   | 2.24 |
|               | 5.11  | 4.21 | 4.14  | 4.4   | 2.25 |

|                       |       |       |       |       |      |
|-----------------------|-------|-------|-------|-------|------|
|                       | 4.25  | 3.52  | 3.55  | 3.99  | 2.25 |
| Mir6917               | 6     | 6.04  | 5.14  | 6.35  | 2.26 |
|                       | 4.04  | 3.49  | 3.53  | 4.16  | 2.26 |
|                       | 4.79  | 3.92  | 3.82  | 4.12  | 2.26 |
|                       | 3.78  | 3.23  | 3.47  | 4.1   | 2.26 |
|                       | 7.06  | 6.95  | 7.12  | 8.19  | 2.26 |
|                       | 3.78  | 3.53  | 3.43  | 4.35  | 2.26 |
| n-R5s52               | 4.2   | 3.46  | 3.81  | 4.25  | 2.26 |
| Gm6254                | 11.17 | 10.08 | 10.18 | 10.27 | 2.26 |
| Gm24124               | 5.07  | 4.51  | 4.48  | 5.09  | 2.26 |
| Gm25819               | 4.8   | 4.11  | 4.41  | 4.89  | 2.26 |
| Olfir734              | 4.36  | 4.1   | 3.43  | 4.35  | 2.27 |
|                       | 8.55  | 7.85  | 7.99  | 8.48  | 2.27 |
|                       | 4.44  | 3.6   | 3.67  | 4.02  | 2.27 |
|                       | 4.61  | 4.29  | 4.07  | 4.93  | 2.27 |
|                       | 4.38  | 3.78  | 3.76  | 4.34  | 2.27 |
|                       | 5.24  | 4.93  | 4.6   | 5.47  | 2.27 |
|                       | 4.09  | 3.84  | 3.71  | 4.64  | 2.27 |
|                       | 5.93  | 5.73  | 5.71  | 6.69  | 2.27 |
| Gm26004               | 4.31  | 3.95  | 3.41  | 4.23  | 2.27 |
| Gm10862               | 4.94  | 4.23  | 5.05  | 5.53  | 2.27 |
|                       | 4.86  | 3.96  | 4.17  | 4.45  | 2.28 |
|                       | 5     | 4.63  | 4.38  | 5.19  | 2.28 |
|                       | 10.93 | 11.03 | 9.74  | 11.03 | 2.28 |
|                       | 4.41  | 3.89  | 3.6   | 4.28  | 2.28 |
| Mir7665               | 5.39  | 4.34  | 4.43  | 4.57  | 2.29 |
|                       | 5.24  | 4.86  | 4.62  | 5.44  | 2.29 |
|                       | 3.8   | 3.51  | 3.65  | 4.55  | 2.29 |
| Gm26581; RP23-58L22.8 | 3.64  | 3.57  | 3.37  | 4.5   | 2.29 |
|                       | 5.76  | 5.35  | 5.07  | 5.86  | 2.3  |
|                       | 5.01  | 4.65  | 4.53  | 5.36  | 2.3  |
|                       | 4.16  | 3.64  | 3.58  | 4.25  | 2.3  |
|                       | 4.24  | 3.73  | 3.64  | 4.32  | 2.3  |
|                       | 4.53  | 3.84  | 4.09  | 4.6   | 2.3  |
|                       | 7.03  | 6.56  | 6.23  | 6.97  | 2.3  |
| Gm11617               | 4.01  | 3.71  | 3.38  | 4.28  | 2.3  |
| Gm24348               | 4.32  | 4.11  | 3.69  | 4.68  | 2.3  |
| Gm26396               | 3.98  | 3.56  | 3.6   | 4.39  | 2.3  |
| 1700055C04Rik         | 3.55  | 3.35  | 3.4   | 4.4   | 2.31 |
|                       | 4.07  | 3.58  | 3.55  | 4.26  | 2.31 |
| Gm12055; RP23-16B24.2 | 4.83  | 4.59  | 4.59  | 5.57  | 2.31 |
| Gm24628               | 4.3   | 3.7   | 3.42  | 4.02  | 2.31 |

|                                 |      |      |      |      |      |
|---------------------------------|------|------|------|------|------|
| Mir6964                         | 5.94 | 4.91 | 5.04 | 5.22 | 2.32 |
|                                 | 6.19 | 5.52 | 5.14 | 5.68 | 2.32 |
| Olfr102; Olfr100                | 4.52 | 3.85 | 3.84 | 4.38 | 2.32 |
| Gm14345;<br>Gm14346;<br>Gm14351 | 4.06 | 3.46 | 3.77 | 4.39 | 2.32 |
|                                 | 3.75 | 3.67 | 3.64 | 4.77 | 2.33 |
| Gm19773                         | 6.66 | 5.9  | 6.04 | 6.49 | 2.33 |
|                                 | 6.68 | 5.78 | 6.09 | 6.42 | 2.34 |
|                                 | 3.91 | 3.7  | 3.41 | 4.43 | 2.34 |
| Gm15371                         | 4.11 | 3.65 | 3.53 | 4.3  | 2.34 |
| Gm27016; RP23-<br>433F5.2       | 4.82 | 4.29 | 4.45 | 5.15 | 2.34 |
|                                 | 4.14 | 3.83 | 3.72 | 4.64 | 2.35 |
|                                 | 6.2  | 5.17 | 5.47 | 5.67 | 2.35 |
|                                 | 4.57 | 4.08 | 4    | 4.74 | 2.35 |
|                                 | 5.12 | 4.66 | 4.62 | 5.39 | 2.35 |
| Gm15208; RP24-<br>266P11.2      | 4.53 | 4.08 | 3.89 | 4.68 | 2.35 |
| Gm22868                         | 5.03 | 4.92 | 4.18 | 5.31 | 2.35 |
| Ighv8-5                         | 4.22 | 3.69 | 3.69 | 4.41 | 2.36 |
|                                 | 4.2  | 3.98 | 3.57 | 4.58 | 2.36 |
|                                 | 5.81 | 5.21 | 5.24 | 5.88 | 2.36 |
|                                 | 3.9  | 3.49 | 3.36 | 4.19 | 2.36 |
|                                 | 4.26 | 3.54 | 3.59 | 4.1  | 2.36 |
| Mir5099                         | 8.65 | 7.14 | 7.58 | 7.31 | 2.37 |
| Mir5099                         | 8.65 | 7.14 | 7.58 | 7.31 | 2.37 |
|                                 | 4.47 | 4.08 | 3.87 | 4.73 | 2.37 |
|                                 | 4.83 | 4.17 | 4.15 | 4.72 | 2.37 |
|                                 | 4.18 | 3.63 | 3.55 | 4.25 | 2.37 |
|                                 | 4.33 | 3.76 | 3.65 | 4.32 | 2.37 |
|                                 | 4.78 | 4.07 | 3.66 | 4.2  | 2.37 |
|                                 | 5.27 | 4.87 | 4.7  | 5.56 | 2.38 |
|                                 | 4.27 | 3.7  | 3.68 | 4.36 | 2.38 |
|                                 | 4.42 | 3.95 | 3.8  | 4.58 | 2.39 |
|                                 | 4.16 | 3.68 | 3.47 | 4.25 | 2.39 |
|                                 | 4.65 | 3.69 | 3.66 | 3.96 | 2.39 |
| Gm10985                         | 5.14 | 4.65 | 4.52 | 5.29 | 2.39 |
| Gm25699                         | 4.29 | 3.51 | 3.67 | 4.16 | 2.39 |
| Gm27313                         | 4.59 | 3.9  | 3.59 | 4.15 | 2.39 |
|                                 | 5.37 | 5.07 | 4.88 | 5.85 | 2.4  |
|                                 | 4.85 | 4.35 | 4.05 | 4.81 | 2.4  |
|                                 | 4.71 | 4.39 | 4.05 | 5    | 2.4  |
|                                 | 4.41 | 4.38 | 3.95 | 5.18 | 2.4  |

|            |      |      |       |       |      |
|------------|------|------|-------|-------|------|
|            | 4.25 | 3.87 | 3.72  | 4.61  | 2.41 |
|            | 4.34 | 3.81 | 3.81  | 4.55  | 2.41 |
|            | 6.68 | 6.73 | 5.78  | 7.11  | 2.41 |
|            | 4.54 | 3.92 | 3.84  | 4.48  | 2.41 |
|            | 5.33 | 4.1  | 4.4   | 4.44  | 2.41 |
|            | 4.58 | 3.51 | 3.69  | 3.88  | 2.41 |
|            | 4.76 | 3.82 | 4.27  | 4.6   | 2.41 |
| Trav6-3    | 4.63 | 3.84 | 3.97  | 4.45  | 2.41 |
| Mirlet7f-1 | 4.9  | 4.51 | 4.17  | 5.05  | 2.42 |
|            | 4.09 | 3.76 | 3.83  | 4.78  | 2.42 |
|            | 13.5 | 12.9 | 12.61 | 13.28 | 2.42 |
|            | 4.87 | 4.03 | 3.99  | 4.42  | 2.42 |
| Mir466f-1  | 6.36 | 5.44 | 6.25  | 6.61  | 2.43 |
|            | 4.28 | 3.86 | 3.39  | 4.24  | 2.43 |
|            | 5.12 | 4.21 | 4.6   | 4.97  | 2.43 |
|            | 4.37 | 3.73 | 3.83  | 4.47  | 2.43 |
|            | 6.75 | 5.8  | 5.11  | 5.44  | 2.43 |
| Gm6161     | 9.83 | 8.92 | 8.86  | 9.23  | 2.43 |
| Gm24008    | 4.97 | 4.76 | 4.42  | 5.5   | 2.43 |
| Samd15     | 4.15 | 3.77 | 3.67  | 4.59  | 2.44 |
|            | 3.98 | 3.74 | 3.35  | 4.4   | 2.44 |
| Gm12060    | 5.12 | 4.01 | 4.57  | 4.75  | 2.45 |
|            | 4.36 | 3.83 | 3.9   | 4.67  | 2.45 |
| Dph3b-ps   | 4.29 | 4.03 | 3.79  | 4.83  | 2.46 |
| Mir6987    | 4.54 | 3.85 | 3.85  | 4.46  | 2.46 |
|            | 5.55 | 3.7  | 4.79  | 4.25  | 2.46 |
| Gm24238    | 3.77 | 3.45 | 3.23  | 4.2   | 2.46 |
|            | 4.99 | 4.42 | 4.29  | 5.02  | 2.47 |
|            | 5.17 | 3.87 | 3.79  | 3.79  | 2.47 |
| Mir3098    | 6.84 | 6.51 | 6.19  | 7.17  | 2.48 |
|            | 3.86 | 3.58 | 3.44  | 4.47  | 2.48 |
|            | 4.65 | 4.16 | 4     | 4.82  | 2.49 |
|            | 3.8  | 3.67 | 3.28  | 4.47  | 2.49 |
| Gm25407    | 4.72 | 4.5  | 3.83  | 4.93  | 2.49 |
| Gm26414    | 4.19 | 4    | 3.51  | 4.63  | 2.49 |
| Gm26847    | 5.35 | 5.02 | 5.09  | 6.07  | 2.49 |
| Gm11116    | 4.44 | 3.53 | 3.86  | 4.27  | 2.5  |
| Gm25938    | 4.9  | 4.24 | 4.03  | 4.69  | 2.5  |
|            | 3.77 | 3.17 | 3.19  | 3.91  | 2.51 |
| Olf692     | 5.65 | 5.39 | 4.8   | 5.86  | 2.51 |
| Olf912     | 5.14 | 4.36 | 4.39  | 4.94  | 2.51 |
|            | 4.75 | 4.12 | 4.61  | 5.31  | 2.51 |
|            | 5.43 | 4.84 | 4.64  | 5.38  | 2.51 |
|            | 4.03 | 3.56 | 3.41  | 4.27  | 2.51 |

|                        |       |       |       |       |      |
|------------------------|-------|-------|-------|-------|------|
| Gm14481                | 4.47  | 4.17  | 4.25  | 5.28  | 2.51 |
|                        | 3.76  | 3.41  | 3.52  | 4.5   | 2.52 |
|                        | 4.5   | 3.92  | 3.99  | 4.74  | 2.52 |
|                        | 3.8   | 3.49  | 3.28  | 4.3   | 2.52 |
| Gm14951; RP23-83P7.2   | 4.2   | 3.58  | 3.61  | 4.32  | 2.52 |
|                        | 3.71  | 3.69  | 3.47  | 4.79  | 2.53 |
|                        | 4.79  | 4.43  | 4.4   | 5.38  | 2.53 |
| Gm24111                | 4.09  | 3.76  | 3.65  | 4.66  | 2.53 |
|                        | 4.18  | 3.83  | 3.56  | 4.55  | 2.54 |
|                        | 5.63  | 5.29  | 4.92  | 5.94  | 2.55 |
| Gm13686; RP23-141N19.1 | 5.39  | 4.82  | 5.01  | 5.78  | 2.55 |
|                        | 7.8   | 6.49  | 6.29  | 6.34  | 2.56 |
|                        | 4.66  | 3.97  | 4.06  | 4.73  | 2.56 |
| Gm14946                | 8     | 7.86  | 6.87  | 8.09  | 2.56 |
| Olf978                 | 4.28  | 3.84  | 3.54  | 4.46  | 2.57 |
|                        | 4.39  | 3.92  | 3.92  | 4.8   | 2.57 |
| Gm16171                | 4.31  | 3.79  | 3.89  | 4.73  | 2.57 |
|                        | 17.57 | 17.38 | 16.49 | 17.67 | 2.58 |
|                        | 5.46  | 4.93  | 4.91  | 5.74  | 2.58 |
|                        | 3.81  | 3.38  | 3.22  | 4.16  | 2.58 |
|                        | 4.51  | 4.11  | 3.94  | 4.9   | 2.58 |
| Gm24291                | 5.51  | 4.83  | 5.15  | 5.84  | 2.58 |
| Olf959                 | 4.19  | 3.61  | 3.55  | 4.35  | 2.59 |
|                        | 4.64  | 4.09  | 3.76  | 4.59  | 2.59 |
| Gm23407                | 9.23  | 8.95  | 8.56  | 9.65  | 2.59 |
| Mir5125                | 7.08  | 5.87  | 5.38  | 5.54  | 2.6  |
|                        | 8.39  | 7.67  | 7.67  | 8.33  | 2.6  |
| Gm6117; RP23-192D5.2   | 4.61  | 3.84  | 3.59  | 4.21  | 2.6  |
| Gm26741                | 3.93  | 3.45  | 3.49  | 4.39  | 2.6  |
|                        | 5.26  | 4.6   | 4.72  | 5.44  | 2.61 |
| Gm22105                | 4.13  | 3.43  | 3.41  | 4.1   | 2.62 |
| Gm27190                | 4.03  | 3.49  | 3.36  | 4.21  | 2.63 |
|                        | 4.86  | 4.33  | 3.74  | 4.62  | 2.64 |
|                        | 5.02  | 4.32  | 4.26  | 4.96  | 2.64 |
|                        | 5.34  | 4.93  | 4.65  | 5.64  | 2.64 |
|                        | 3.77  | 3.7   | 3.66  | 4.98  | 2.64 |
| Mir5128                | 4.55  | 3.12  | 3.63  | 3.61  | 2.65 |
| Mir1951                | 8.31  | 8.04  | 7.61  | 8.76  | 2.66 |
| n-R5s202               | 4.92  | 3.95  | 4.25  | 4.7   | 2.66 |
| Gm14731                | 4.51  | 3.89  | 3.93  | 4.73  | 2.66 |
|                        | 4.3   | 3.64  | 3.39  | 4.14  | 2.67 |

|            |       |       |       |       |      |
|------------|-------|-------|-------|-------|------|
|            | 4.44  | 3.86  | 4.04  | 4.88  | 2.67 |
|            | 4.7   | 4.75  | 3.96  | 5.44  | 2.67 |
|            | 4.41  | 3.7   | 3.88  | 4.6   | 2.68 |
|            | 4.73  | 4.26  | 4.08  | 5.03  | 2.68 |
|            | 4.06  | 3.66  | 3.67  | 4.69  | 2.68 |
| Gm17919    | 3.82  | 3.59  | 3.44  | 4.63  | 2.68 |
| Gm26826    | 4.16  | 3.93  | 3.44  | 4.63  | 2.68 |
| Ranbp2-ps8 | 5.57  | 4.62  | 4.41  | 4.88  | 2.68 |
|            | 4.12  | 3.59  | 3.47  | 4.37  | 2.69 |
| Mir365-1   | 5.96  | 4.81  | 4.87  | 5.16  | 2.7  |
| Mir3092    | 7.87  | 8.02  | 6.87  | 8.46  | 2.7  |
| Gm11037    | 5.05  | 4     | 3.64  | 4.03  | 2.72 |
| Olf1113    | 4.07  | 3.19  | 3.58  | 4.15  | 2.73 |
|            | 5     | 4.28  | 4.25  | 4.98  | 2.73 |
|            | 7.26  | 5.93  | 6.53  | 6.65  | 2.73 |
| Mir7078    | 6.58  | 5.76  | 5.79  | 6.43  | 2.74 |
| n-R5s216   | 4.58  | 4.01  | 3.82  | 4.71  | 2.74 |
| Gm24621    | 6.34  | 4.88  | 5.13  | 5.15  | 2.76 |
| PRINS      | 4.14  | 3.83  | 3.45  | 4.61  | 2.76 |
| Gm24079    | 4.8   | 4.47  | 4.12  | 5.26  | 2.77 |
| Mir7667    | 4.08  | 3.8   | 3.99  | 5.19  | 2.79 |
|            | 4.51  | 3.82  | 3.77  | 4.57  | 2.8  |
|            | 5.27  | 4.86  | 5.02  | 6.09  | 2.8  |
| Gm23753    | 5.49  | 4.89  | 4.55  | 5.44  | 2.8  |
| Ifna11     | 4.13  | 3.97  | 3.76  | 5.09  | 2.81 |
| Mir6338    | 4.43  | 4.24  | 4.04  | 5.35  | 2.81 |
|            | 4.62  | 4.1   | 3.89  | 4.86  | 2.81 |
|            | 13.59 | 13.57 | 12.36 | 13.83 | 2.81 |
| Gm23000    | 6.75  | 6.15  | 6.15  | 7.04  | 2.81 |
| Mir1961    | 4.6   | 3.85  | 3.73  | 4.47  | 2.82 |
| Gm24691    | 4.42  | 3.96  | 3.57  | 4.6   | 2.82 |
| Gm24913    | 4.2   | 4.09  | 3.9   | 5.28  | 2.82 |
| Mir5108    | 7.45  | 6.73  | 6.74  | 7.52  | 2.83 |
|            | 5.62  | 4.29  | 4.27  | 4.45  | 2.84 |
|            | 4.69  | 4.34  | 4.4   | 5.56  | 2.84 |
|            | 6.23  | 5.31  | 5.15  | 5.74  | 2.85 |
| Gm26411    | 5.17  | 4.68  | 4.79  | 5.81  | 2.85 |
|            | 4.68  | 3.85  | 3.68  | 4.37  | 2.86 |
|            | 4.61  | 4.77  | 3.7   | 5.38  | 2.87 |
|            | 7.85  | 6.95  | 6.78  | 7.4   | 2.87 |
|            | 4.21  | 3.6   | 3.55  | 4.46  | 2.88 |
| Gm22927    | 4.99  | 4.22  | 4.58  | 5.34  | 2.88 |
| n-R5s151   | 5.81  | 5.19  | 4.78  | 5.7   | 2.89 |
| Gm20917    | 4.6   | 3.79  | 3.77  | 4.5   | 2.89 |

|                       |       |       |      |       |      |
|-----------------------|-------|-------|------|-------|------|
|                       | 5.94  | 4.44  | 4.65 | 4.68  | 2.9  |
|                       | 4.61  | 3.74  | 3.73 | 4.4   | 2.9  |
| Gm13018; RP23-416J8.1 | 5.88  | 4.61  | 5.38 | 5.66  | 2.93 |
|                       | 4.43  | 3.78  | 3.63 | 4.54  | 2.95 |
|                       | 5.77  | 5.3   | 5.14 | 6.24  | 2.97 |
| Gm24783               | 5.27  | 4.34  | 3.95 | 4.59  | 2.98 |
| Gm22779               | 4.83  | 4.18  | 4.28 | 5.21  | 2.99 |
| Gm23448               | 5.02  | 4.05  | 3.86 | 4.47  | 2.99 |
|                       | 5.1   | 3.97  | 3.71 | 4.18  | 3.01 |
| Gm16339; RP24-369B4.1 | 5.27  | 4.37  | 3.95 | 4.65  | 3.03 |
| Gm23308               | 6.87  | 6.57  | 6.42 | 7.72  | 3.03 |
|                       | 4.64  | 3.42  | 3.37 | 3.77  | 3.07 |
|                       | 4.66  | 4.25  | 4.14 | 5.36  | 3.07 |
|                       | 4.67  | 3.63  | 3.78 | 4.37  | 3.1  |
| Gm24233               | 5.1   | 4.68  | 4.37 | 5.58  | 3.1  |
|                       | 4.75  | 3.75  | 3.92 | 4.57  | 3.12 |
|                       | 7.28  | 6.36  | 6.14 | 6.86  | 3.13 |
|                       | 5.44  | 4.79  | 4.14 | 5.14  | 3.14 |
|                       | 4.41  | 3.8   | 4.23 | 5.27  | 3.14 |
| Gm25153               | 5.43  | 4.74  | 4.27 | 5.23  | 3.14 |
| Gm25722               | 5.5   | 4.97  | 4.75 | 5.88  | 3.14 |
|                       | 4.84  | 4.69  | 4.05 | 5.57  | 3.17 |
| Gm26308               | 7.96  | 7.57  | 7.44 | 8.72  | 3.17 |
|                       | 7.65  | 7.06  | 6.29 | 7.36  | 3.18 |
| Mir7094-2             | 4.57  | 3.77  | 3.64 | 4.52  | 3.21 |
| Ighv5-12-4            | 7.48  | 7.22  | 6.16 | 7.59  | 3.23 |
| Mir1960               | 5.04  | 4.46  | 3.65 | 4.77  | 3.24 |
| Gm23737               | 6.18  | 5.59  | 5.09 | 6.21  | 3.25 |
| Mir6916               | 6.12  | 5.45  | 5.05 | 6.09  | 3.28 |
|                       | 4.54  | 4.07  | 3.52 | 4.77  | 3.28 |
|                       | 4.25  | 3.24  | 3.44 | 4.15  | 3.28 |
| Gm27490               | 5.87  | 5.26  | 5.09 | 6.21  | 3.3  |
|                       | 5.82  | 4.61  | 4.51 | 5.04  | 3.32 |
|                       | 6.86  | 5.65  | 5.72 | 6.25  | 3.33 |
| Gm22663               | 10.95 | 10.23 | 9.61 | 10.63 | 3.33 |
|                       | 4.13  | 3.94  | 3.4  | 4.95  | 3.34 |
| Gm23387               | 5.59  | 4.79  | 4.69 | 5.64  | 3.35 |
|                       | 7.63  | 6.92  | 6.57 | 7.62  | 3.4  |
|                       | 6.12  | 6.32  | 5.04 | 7.01  | 3.42 |
|                       | 5.5   | 3.66  | 3.89 | 3.83  | 3.44 |
|                       | 12.29 | 11.99 | 10.9 | 12.37 | 3.44 |
|                       | 4.58  | 4.16  | 3.7  | 5.06  | 3.45 |



|                        |       |       |       |       |      |
|------------------------|-------|-------|-------|-------|------|
| Gm20391                | 5.17  | 4.68  | 4.29  | 5.59  | 3.47 |
| Gm22786                | 4.88  | 4.6   | 4.24  | 5.76  | 3.52 |
| Gm15724; RP23-246B24.3 | 7.92  | 6.94  | 6.46  | 7.31  | 3.55 |
|                        | 5     | 4.32  | 4.46  | 5.63  | 3.57 |
|                        | 4.98  | 4.18  | 4.1   | 5.14  | 3.6  |
| Gm25160                | 5.98  | 4.86  | 5.27  | 6.01  | 3.64 |
| Gm2531                 | 6.7   | 4.98  | 4.78  | 4.95  | 3.7  |
| Gm14209; RP23-464H11.2 | 5.36  | 4.39  | 4.2   | 5.14  | 3.74 |
| Gm17268                | 13.88 | 13.29 | 13.48 | 14.8  | 3.75 |
| Gm25428                | 4.95  | 4.26  | 4.53  | 5.76  | 3.78 |
| Gm22507                | 7.21  | 5.74  | 5.97  | 6.43  | 3.81 |
| Mir6388                | 5.01  | 4.21  | 4.25  | 5.38  | 3.82 |
| Gm24541                | 5.82  | 5.25  | 4.48  | 5.85  | 3.85 |
|                        | 6.64  | 5.07  | 5.18  | 5.55  | 3.86 |
| Gm23322                | 7.68  | 7.13  | 6.43  | 7.84  | 3.86 |
| Mir511                 | 5.21  | 4.19  | 4.28  | 5.21  | 3.87 |
| Gm14604; RP23-260P9.1  | 6.74  | 5.98  | 5.32  | 6.53  | 3.92 |
| Gm22527                | 4.65  | 4.35  | 3.76  | 5.46  | 3.99 |
| Traj29                 | 7.98  | 7.13  | 6.76  | 7.91  | 4.01 |
| Gm25522                | 7.11  | 5.98  | 5.96  | 6.83  | 4.02 |
| Mir7053                | 10.78 | 9.81  | 9.57  | 10.62 | 4.03 |
|                        | 5.69  | 4.81  | 4.71  | 5.85  | 4.04 |
| LOC100861648           | 5.89  | 4.66  | 5.07  | 5.87  | 4.08 |
|                        | 4.97  | 3.58  | 3.78  | 4.43  | 4.1  |
|                        | 6.83  | 5.79  | 5.18  | 6.19  | 4.16 |
| Gm25581                | 7.61  | 6.14  | 6.24  | 6.82  | 4.17 |
|                        | 5.6   | 4.65  | 4.83  | 5.94  | 4.19 |
|                        | 6.65  | 5.97  | 5.45  | 6.87  | 4.29 |
| Gm26002                | 6.26  | 5.24  | 5.53  | 6.62  | 4.29 |
| Gm23221                | 7.19  | 6.17  | 6.18  | 7.27  | 4.31 |
| Gm22043                | 5.64  | 4.48  | 4.4   | 5.38  | 4.38 |
|                        | 5.06  | 4     | 4.05  | 5.13  | 4.42 |
|                        | 5.06  | 4     | 4.05  | 5.13  | 4.42 |
|                        | 5.06  | 4     | 4.05  | 5.13  | 4.42 |
|                        | 8.11  | 7.05  | 7.19  | 8.28  | 4.45 |
|                        | 5.08  | 3.72  | 3.79  | 4.58  | 4.46 |
| Gm25660                | 9.33  | 8.37  | 7.94  | 9.15  | 4.51 |
|                        | 6.2   | 5.35  | 5.29  | 6.63  | 4.52 |
|                        | 6.2   | 5.35  | 5.29  | 6.63  | 4.52 |
|                        | 6.2   | 5.35  | 5.29  | 6.63  | 4.52 |
|                        | 6.2   | 5.35  | 5.29  | 6.63  | 4.52 |

|          |       |       |       |       |       |
|----------|-------|-------|-------|-------|-------|
|          | 6.2   | 5.35  | 5.29  | 6.63  | 4.52  |
|          | 6.2   | 5.35  | 5.29  | 6.63  | 4.52  |
|          | 6.2   | 5.35  | 5.29  | 6.63  | 4.52  |
|          | 6.2   | 5.35  | 5.29  | 6.63  | 4.52  |
|          | 6.2   | 5.35  | 5.29  | 6.63  | 4.52  |
|          | 6.2   | 5.35  | 5.29  | 6.63  | 4.52  |
|          | 6.2   | 5.35  | 5.29  | 6.63  | 4.52  |
|          | 6.2   | 5.35  | 5.29  | 6.63  | 4.52  |
|          | 6.2   | 5.35  | 5.29  | 6.63  | 4.52  |
|          | 6.2   | 5.35  | 5.29  | 6.63  | 4.52  |
|          | 6.2   | 5.35  | 5.29  | 6.63  | 4.52  |
|          | 6.2   | 5.35  | 5.29  | 6.63  | 4.52  |
|          | 6.2   | 5.35  | 5.29  | 6.63  | 4.52  |
|          | 6.2   | 5.35  | 5.29  | 6.63  | 4.52  |
| Mir7047  | 7.55  | 6.08  | 6.36  | 7.08  | 4.53  |
| Gm24088  | 6.36  | 4.81  | 5.7   | 6.35  | 4.6   |
|          | 4.85  | 3.69  | 3.56  | 4.61  | 4.63  |
|          | 4.79  | 3.63  | 4.13  | 5.18  | 4.64  |
|          | 4.92  | 4.26  | 3.87  | 5.44  | 4.72  |
|          | 11.31 | 10.25 | 10.17 | 11.38 | 4.85  |
| Gm24032  | 7.15  | 6.14  | 6.01  | 7.3   | 4.91  |
| Mir6930  | 12.03 | 11.09 | 11.07 | 12.54 | 5.29  |
|          | 5.82  | 4.12  | 4.08  | 4.82  | 5.39  |
|          | 12.31 | 10.69 | 10.6  | 11.44 | 5.51  |
| Gm26121  | 6.24  | 4.76  | 4.74  | 5.74  | 5.57  |
| Gm27722  | 5.74  | 5.43  | 4.64  | 6.86  | 5.77  |
|          | 5.41  | 4.91  | 4.7   | 6.79  | 6.04  |
|          | 10.36 | 9.27  | 8.55  | 10.05 | 6.04  |
| Gm24878  | 6.19  | 4.58  | 4.69  | 5.73  | 6.26  |
| Gm15665  | 6.44  | 5.18  | 3.95  | 5.37  | 6.44  |
| Ighv1-63 | 6.25  | 6.39  | 4.71  | 7.7   | 7.26  |
| Gm17428  | 19.38 | 19.16 | 16.92 | 19.59 | 7.37  |
|          | 8.47  | 6.51  | 5.36  | 6.29  | 7.45  |
| Mir8095  | 7.09  | 5.51  | 5.22  | 6.56  | 7.61  |
| Gm10198  | 10.18 | 9.83  | 8.27  | 10.88 | 7.74  |
|          | 11.47 | 10.63 | 9.25  | 11.53 | 8.66  |
| Mir8115  | 9.96  | 9.05  | 7.51  | 9.72  | 8.68  |
|          | 12.94 | 12.94 | 10.37 | 13.52 | 8.94  |
| Snord82  | 7.59  | 6.79  | 5.13  | 7.61  | 9.71  |
| Gm10181  | 15.19 | 14.72 | 12.73 | 15.58 | 9.97  |
|          | 9.55  | 8.64  | 6.59  | 9.04  | 10.38 |
| Gm11172  | 12.52 | 11.52 | 10.66 | 13.08 | 10.7  |
|          | 6.76  | 5.18  | 5.36  | 7.44  | 12.66 |
| Gm17604  | 14.73 | 14.65 | 10.81 | 15.11 | 20.84 |

|         |       |       |       |       |        |
|---------|-------|-------|-------|-------|--------|
| Gm23098 | 7.36  | 3.84  | 3.3   | 4.17  | 20.99  |
|         | 3.3   | 3.25  | 2.69  | 7.06  | 21.26  |
|         | 3.3   | 3.25  | 2.69  | 7.06  | 21.26  |
|         | 3.3   | 3.25  | 2.69  | 7.06  | 21.26  |
|         | 3.3   | 3.25  | 2.69  | 7.06  | 21.26  |
|         | 3.3   | 3.25  | 2.69  | 7.06  | 21.26  |
|         | 3.3   | 3.25  | 2.69  | 7.06  | 21.26  |
|         | 16.07 | 15.69 | 12.44 | 16.82 | 27.01  |
|         | 16.07 | 15.69 | 12.44 | 16.82 | 27.01  |
|         | 16.07 | 15.69 | 12.44 | 16.82 | 27.01  |
|         | 16.07 | 15.69 | 12.44 | 16.82 | 27.01  |
|         | 16.07 | 15.69 | 12.44 | 16.82 | 27.01  |
|         | 7.33  | 6.23  | 5.75  | 9.72  | 33.66  |
|         | 8.38  | 5.93  | 4.72  | 9.47  | 148.27 |
